# Supplementary material for: GWAS of Suicide Attempt in Psychiatric Disorders and Association With Major Depression Polygenic Risk Scores
Source: Atypon-hosted journal article supplement (doi:10.1176/appi.ajp.2019.18080957), 2019-06-05
Supplement: appi.ajp.2019.18080957.ds001.pdf [file appi.ajp.2019.18080957.ds001.pdf]

 


Psychiatry Online
