# Supplementary material for: GWAS of Suicide Attempt in Psychiatric Disorders and Association With Major Depression Polygenic Risk Scores
Source: Atypon-hosted journal article supplement (doi:10.1176/appi.ajp.2019.18080957), 2019-06-05
Supplement: appi.ajp.2019.18080957.ds001.pdf [file appi.ajp.2019.18080957.ds001.pdf]

Data Supplement for Mullins et al., GWAS of Suicide Attempt in Psychiatric Disorders and Association With Major Depression Polygenic Risk Scores. Am J Psychiatry (doi: 10.1176/appi.ajp.2019.18080957).

## Contents

|                                                      |           |
|------------------------------------------------------|-----------|
| <b><i>Supplementary Note</i></b> .....               | <b>2</b>  |
| <b><i>Supplementary Tables and Figures</i></b> ..... | <b>9</b>  |
| <b><i>Acknowledgments</i></b> .....                  | <b>24</b> |
| <b><i>Consortium Authorship</i></b> .....            | <b>32</b> |

## **Supplementary Note**

### **Phenotype definition**

Items from structured clinical interviews provided information on self-harm, suicidal ideation, plans and suicide attempt for Psychiatric Genomics Consortium (PGC) cohorts (Supplementary Table 4). Lifetime suicide attempt (SA) was defined across cohorts as a deliberate act of self-harm with at least some intent to result in death. Individuals who did not endorse suicide attempt were included in the non-attempter group and individuals missing information on suicide attempt were excluded. Phenotypic analyses were performed to assess the consistency of the suicide attempt phenotype across the 46 discovery cohorts. First, the association between the psychiatric interview used and the prevalence of suicide attempt in the cohorts was tested, using a linear regression model including psychiatric disorder as a covariate. The only psychiatric interview which showed an association with the prevalence of suicide attempt was the Schedule for Affective Disorders and Schizophrenia (SADS), which was used by eight cohorts and correlated with a higher prevalence of suicide attempt ( $P = 0.038$ ). We note that the SADS interview has a specific item on suicide attempt and does not include self-harm or suicidal ideation (which are assessed using other items in the SADS) (Supplementary Table 4). The interview also specifies that evidence of intent to die is essential for suicide attempt and in the absence of intent “non-suicidal self-injurious behavior” is instead indicated. Therefore, we do not anticipate that the suicide attempter groups from cohorts assessed using the SADS may incorrectly include cases of suicidal ideation only. Furthermore, of the eight cohorts which used the SADS interview, five recruited psychiatric cases from inpatient hospital admissions and hence these cohorts may be more severe and have a higher prevalence of suicide attempt than other cohorts (Supplementary Tables 1-3).

Second, we assessed whether there was any association between prevalence of suicide attempt and interview items which are specific to suicide attempt only or those which assess a spectrum of suicidality (ranging from absence, to self-harm, ideation, plan and suicide attempt) in a single item

(Supplementary Table 4). In the latter, psychiatric cases were split into suicide attempters only versus other psychiatric cases according to the coding of the item. Individuals with missing data were excluded. Using a linear regression model, controlling for psychiatric disorder, there was no association between the prevalence of suicide attempt and the specificity of the item used. Since interviews assessing the spectrum of suicidality in a single item did not produce higher estimates of suicide attempt, this suggests that these do not report cases of suicidal ideation only as suicide attempters. In summary, these analyses suggest that the psychiatric interview used across cohorts does not result in heterogeneity in the definition of suicide attempt.

### **Polygenic risk scoring**

Polygenic risk scoring was used to investigate the genetic relationship between suicide attempt and the psychiatric disorders and to test for overlap in the genetic etiology of suicide attempt between major depressive disorder (MDD), bipolar disorder (BIP) and schizophrenia (SCZ). Table S5 summarises the polygenic scoring analyses conducted, showing the discovery and test datasets used to investigate these hypotheses. PRSice software was used to generate polygenic risk scores (PRS), according to standard protocol (1). Discovery GWAS results were pruned for linkage disequilibrium (LD) using the P value informed clumping method in PLINK (--clump-p1 1 --clump-p2 1 --clump-r2 0.1 --clump-kb 250). This preferentially retains SNPs with the strongest evidence of association and removes SNPs in LD ( $r^2 > 0.1$ ) that show weaker evidence of association within 250Kb windows, based on the LD structure in the test dataset. Subsets of SNPs were selected from the results at nine increasingly liberal P value thresholds ( $P < 0.0001$ ,  $P < 0.001$ ,  $P < 0.01$ ,  $P < 0.05$ ,  $P < 0.1$ ,  $P < 0.2$ ,  $P < 0.3$ ,  $P < 0.4$ ,  $P < 0.5$ ). In the test datasets, the SNP probabilities were converted to best-guess data with a genotype call probability cut-off of 0.8. Sets of alleles, weighted by their log odds ratios (OR) from the discovery GWAS, were summed into PRS for each individual in the test datasets using PLINK. PRS were tested for association with suicide attempter status in the test datasets using a logistic regression model, including five genetic principal components (PCs) and a covariate for each cohort in the test dataset.

The amount of variance explained by the PRS ( $R^2$ ) is presented on the liability scale, which accounts for the proportion of cases in the test dataset (2).

First, PRS for BIP, major depression and SCZ were used to investigate whether suicide attempters and non-attempters differ in genetic liability for the psychiatric disorder they are affected by. To ensure no overlap between the discovery and test datasets, PRS for psychiatric disorders were generated using PGC cohorts not included in the suicide attempt analyses. All cohorts have been described in previous publications on GWAS of psychiatric disorders conducted by the PGC (3-5). The discovery GWAS for BIP consisted of 11 PGC cohorts totaling 8,711 BIP cases and 15,283 controls, and for SCZ included 25,756 SCZ cases and 35,686 controls from 40 PGC cohorts. The discovery GWAS for major depression is a recent meta-analysis of PGC MDD cohorts and samples from deCODE, GERA, *i*PSYCH, Generation Scotland and UK Biobank (3). The phenotype analysed in this study included clinically defined MDD cases as well as self-reported MDD symptoms or treatment and thus is referred to as 'major depression' (3). Results of this meta-analysis were available in turn excluding each of the 16 PGC MDD cohorts in the suicide attempt study, which allowed us to generate independent PRS for each of the 16 cohorts while maximising the discovery GWAS sample size. These discovery GWAS had approximately 59,000 cases and 112,000 controls. The PRS for BIP, major depression and SCZ were tested for association with suicide attempter versus non-attempter status in the same disorder using logistic regression as described previously. Second, based on the results of these analyses, PRS for major depression were also tested for association with suicide attempt in BIP and SCZ.

Third, in order to investigate genetic overlap in suicide attempt across psychiatric disorders, the results of the three GWAS on suicide attempt (SA in MDD, SA in BIP and SA in SCZ) were used in turn as discovery studies and PRS for suicide attempt were tested for association with SA in the other disorders. The Bonferroni corrected significance threshold for the polygenic scoring analyses is 0.006, adjusting for eight independent tests (Supplementary Table S5).

## Replication studies

### UK Biobank

Genetic associations with suicide attempt were tested for replication in two independent samples of patients with mood disorders drawn from the UK Biobank and *i*PSYCH. The UK Biobank is a prospective cohort study of 501,726 individuals, recruited at 23 centres across the United Kingdom (6). Genotypic data were available for 488,380 individuals and were imputed to the HRC, UK10K and 1,000 Genomes Phase 3 reference panels using IMPUTE4 to identify  $\approx$  93M variants for 487,409 individuals (7). Variants for analysis were limited to those with minor allele frequency  $\geq$  0.01, imputation INFO-score  $\geq$  0.4, and which were either genotyped or imputed to the HRC reference panel, leaving a total of 7794483 SNPs for analysis. Using the genotyped SNPs, individuals were removed if: recommended by the UK Biobank core analysis team for unusual levels of missingness or heterozygosity; SNP genotype call rate  $<$  98%; related to another individual in the dataset (KING  $r <$  0.044, equivalent to removing up to third-degree relatives inclusive); phenotypic and genotypic gender information was discordant (X-chromosome homozygosity (FX)  $<$  0.9 for phenotypic males, FX  $>$  0.5 for phenotypic females). Removal of relatives was performed using a greedy algorithm, which minimises exclusions (for example, by excluding the child in a mother-father-child trio). All analyses were limited to individuals of White Western European ancestry, as defined by 4-means clustering on the first two genetic principal components provided by the UK Biobank (7). Principal component analysis was also performed on the European-only subset of the data using the software flashpca2 (8).

Extensive phenotypic data are available for UK Biobank participants from health records and questionnaires, including an online follow-up questionnaire focussing on mental health (Mental Health Questionnaire, MHQ). Participants were classified as having a mood disorder if they either self-reported a professional diagnosis of depression or bipolar disorder as part of the MHQ [UK Biobank field 20544] or if they met criteria for depression on MHQ questions derived from the Composite International Diagnostic Interview (CIDI). To meet these latter criteria, participants must have

reported ever feeling depressed [UK Biobank field 20446] or anhedonic [UK Biobank field 20441] for two weeks in a row, for at least most of the day [UK Biobank field 20436] almost every day [UK Biobank field 20439] with more than a little interference with daily activities [UK Biobank field 20440]. In addition, they must have reported experiencing at least five of the following symptoms in this period of depression or anhedonia: depression [UK Biobank field 20446], anhedonia [UK Biobank field 20441], tiredness [UK Biobank field 20449], weight change [UK Biobank field 20536], sleep change [UK Biobank field 20532], loss of concentration [UK Biobank field 20435], worthlessness [UK Biobank field 20450] and thoughts of death [UK Biobank field 20437]. The MHQ additionally contained screening questions for bipolar disorder (9). However, for the purpose of defining potential bipolar disorder, all individuals scoring positively on these screening questions were also required to meet the CIDI depression criteria defined above, and as such participants with potential bipolar disorder were a subset of those meeting criteria for depression. Individuals who self-reported a professional diagnosis of psychosis on the MHQ [UK Biobank field 20544] were excluded. Suicide attempters with mood disorders (n=2149) were defined as those who answered yes to the question “Have you ever harmed yourself with the intention to end your life?” [UK Biobank field 20483]. Non-attempters with mood disorders were defined as those who reported no self-harm on the MHQ (n=35912). A genome-wide association study was performed comparing suicide attempters versus non-attempters with mood disorders using BGenie v.1.2 (7), covarying for 6 PCs, and factors capturing site of recruitment and genotyping batch.

## ***i*PSYCH**

The *i*PSYCH study was approved by the regional Danish ethics committee and the Danish Data Protection Agency (10). DNA preparation, genotyping on the Illumina PsychChip array and quality control were performed as described previously (11, 12). Individuals with mood disorders were identified based on ICD-10 codes (F30-F39) from the Danish Psychiatric Central Research Register and the National Registry of Patients, both complete until December 31, 2016 (10). Suicide attempters with mood disorders (n=4943) were defined as those with diagnoses of suicide attempt (ICD-10: X60-

X84, equivalent to intentional self-harm), those with suicide attempt indicated as 'reason for contact', and with a main diagnosis of poisoning (ICD-10: T39, T42, T43, and T58) or those with a diagnosis in the ICD-10: F chapter as main diagnosis and report of poisoning by drugs or other substances (ICD-10: T36–T50, T52–T60) or injuries to hand, wrist, and forearm (ICD-10: S51, S55, S59, S61, S65, S69). Only contacts starting at age 10 years old or older were considered. Individuals who died by suicide according to the Cause of Death Register were also included in the suicide attempter group. Non-attempters were defined as mood disorder cases not fulfilling any of these criteria (n=15849).

### **Analysis of depressive symptoms and suicide attempt in schizophrenia**

Data on symptoms of illness in schizophrenia were available for eight of the PGC SCZ cohorts included in the GWAS on suicide attempt. Clinical symptoms were assessed using the OPCRIT (Operational Criteria for Psychotic Illness), PANSS (Positive and Negative Syndrome Scale), Lifetime Dimensions of Psychosis Scale (LDPS) or the Comprehensive Assessment of Symptoms and History (CASH) (13-16). As previously described, factor analyses were performed on these data to identify a quantitative depressive symptom dimension, harmonized across instruments and cohorts (17). Data were available for 1426 suicide attempters and 2428 non-attempters with schizophrenia. The association between standardized depressive symptom-based factor scores and suicide attempt was investigated using a logistic regression model, covarying for sex and cohort. Higher depressive symptom factor scores were significantly associated with suicide attempt (OR = 1.67, C.I. 1.56 -1.79,  $P = 2.7 \times 10^{-47}$ ).

### **References**

1. Euesden J, Lewis CM, O'Reilly PF. PRSice: Polygenic Risk Score software. *Bioinformatics*. 2015;31(9):1466-8.
2. Lee SH, Goddard ME, Wray NR, Visscher PM. A better coefficient of determination for genetic profile analysis. *Genet Epidemiol*. 2012;36(3):214-24.
3. Wray NR, Ripke S, Mattheisen M, Trzaskowski M, Byrne EM, Abdellaoui A, et al. Genome-wide association analyses identify 44 risk variants and refine the genetic architecture of major depression. *Nat Genet*. 2018;50(5):668-81.

4. Stahl E, Forstner A, McQuillin A, Ripke S, Bipolar Disorder Working Group of the PGC, Ophoff R, et al. Genomewide association study identifies 30 loci associated with bipolar disorder. *bioRxiv*. 2017.
5. Schizophrenia Working Group of the Psychiatric Genomics Consortium. Biological insights from 108 schizophrenia-associated genetic loci. *Nature*. 2014;511(7510):421-7.
6. Sudlow C, Gallacher J, Allen N, Beral V, Burton P, Danesh J, et al. UK biobank: an open access resource for identifying the causes of a wide range of complex diseases of middle and old age. *PLoS Med*. 2015;12(3):e1001779.
7. Bycroft C, Freeman C, Petkova D, Band G, Elliott LT, Sharp K, et al. Genome-wide genetic data on ~500,000 UK Biobank participants. *bioRxiv*. 2017.
8. Abraham G, Qiu Y, Inouye M. FlashPCA2: principal component analysis of Biobank-scale genotype datasets. *Bioinformatics*. 2017;33(17):2776-8.
9. Smith DJ, Nicholl BI, Cullen B, Martin D, Ul-Haq Z, Evans J, et al. Prevalence and characteristics of probable major depression and bipolar disorder within UK biobank: cross-sectional study of 172,751 participants. *PLoS One*. 2013;8(11):e75362.
10. Pedersen CB, Bybjerg-Grauholm J, Pedersen MG, Grove J, Agerbo E, Baekvad-Hansen M, et al. The iPSYCH2012 case-cohort sample: new directions for unravelling genetic and environmental architectures of severe mental disorders. *Mol Psychiatry*. 2018;23(1):6-14.
11. Borglum AD, Demontis D, Grove J, Pallesen J, Hollegaard MV, Pedersen CB, et al. Genome-wide study of association and interaction with maternal cytomegalovirus infection suggests new schizophrenia loci. *Mol Psychiatry*. 2014;19(3):325-33.
12. Hollegaard MV, Grove J, Grauholm J, Kreiner-Moller E, Bonnelykke K, Norgaard M, et al. Robustness of genome-wide scanning using archived dried blood spot samples as a DNA source. *BMC Genet*. 2011;12:58.
13. Levinson DF, Mowry BJ, Escamilla MA, Faraone SV. The Lifetime Dimensions of Psychosis Scale (LDPS): description and interrater reliability. *Schizophr Bull*. 2002;28(4):683-95.
14. Andreasen NC, Flaum M, Arndt S. The Comprehensive Assessment of Symptoms and History (CASH). An instrument for assessing diagnosis and psychopathology. *Arch Gen Psychiatry*. 1992;49(8):615-23.
15. Kay SR, Fiszbein A, Opler LA. The positive and negative syndrome scale (PANSS) for schizophrenia. *Schizophr Bull*. 1987;13(2):261-76.
16. McGuffin P, Farmer A, Harvey I. A polydiagnostic application of operational criteria in studies of psychotic illness. Development and reliability of the OPCRIT system. *Arch Gen Psychiatry*. 1991;48(8):764-70.
17. Ruderfer DM, Fanous AH, Ripke S, McQuillin A, Amdur RL, Schizophrenia Working Group of the Psychiatric Genomics C, et al. Polygenic dissection of diagnosis and clinical dimensions of bipolar disorder and schizophrenia. *Mol Psychiatry*. 2014;19(9):1017-24.



## Supplementary Tables and Figures

**Table S1: Description of 16 major depressive disorder cohorts**

| Cohort (References)    | PGC label      | Country     | Ascertainment and Evaluation of Cases                                       | Inclusion criteria (lifetime) of Cases                                                       | Exclusion criteria (lifetime) of Cases                                          |
|------------------------|----------------|-------------|-----------------------------------------------------------------------------|----------------------------------------------------------------------------------------------|---------------------------------------------------------------------------------|
| BOMA 1-3               | boma           | Germany     | Consecutive inpatients; SCID or SADS interview; medical records             | DSM-IV MDD; German ancestry; age $\geq$ 18                                                   | BIP, hypomania, NAP, MDD related to SUD                                         |
| CoFaMS 4               | cof3           | Australia   | Opportunistic; inpatient & outpatient; SCID or MINI                         | DSM-IV MDD                                                                                   | BIP, NAP, MDD related to SUD                                                    |
| PsyCoLaus 5            | col3           | Switzerland | Random population sample; DIGS                                              | DSM-IV MDD, age 35-66                                                                        | BIP, hypomania, NAP, MDD related to SUD                                         |
| GenRED1 6,7            | gens           | USA         | Opportunistic; DIGS3; medical records or informant (subset)                 | DSM-IV MDD (recurrent or episode $>$ 3 yrs) & onset $<$ 31 yrs; FHx MDD in sibling or parent | BIP, NAP, mod-severe ID; FHx BIP; if SUD, MDD onsets without $<$ 2y of sobriety |
| GenRED2 6              | grnd           | USA         | Opportunistic; DIGS; medical records or informant (subset)                  | DSM-IV MDD (recurrent or episode $>$ 3 yrs) & onset $<$ 31 yrs; FHx MDD in sibling or parent | BIP, NAP, mod-severe ID; FHx BIP; if SUD, MDD onsets without $<$ 2y of sobriety |
| GSK/MPIP 8             | gsk2           | Germany     | Inpatients; SCAN                                                            | DSM-IV MDD (recurrent, mod-severe)                                                           | BIP, NAP, SUD, mood-incongruent psychosis, OCD, PTSD, secondary MD              |
| MARS 9-11              | mml2 mmo4      | Germany     | Inpatients; CIDI                                                            | DSM-IV MDD                                                                                   | BIP, SUD, secondary MD, severe medical conditions                               |
| NESDA/NTR: NESDA 12,13 | nes1           | Netherlands | Psychiatric outpatients, primary care, & population; CIDI                   | DSM-IV MDD                                                                                   | BIP, NAP, SUD                                                                   |
| NESDA/NTR: NTR 12,13   | nes1           | Netherlands | Twin registry; longitudinal MDD sx; CIDI (subset)                           | DSM-IV MDD                                                                                   | Mania (if interviewed)                                                          |
| QIMR 14,15             | qi3c qi6c qi02 | Australia   | Australian Twin Registry (proband most severe, sx, or earlier onset); SSAGA | DSM-IV MDD                                                                                   | MDD related to SUD                                                              |
| RADIANT-UK 16          | rad3           | UK          | UK outpatients from DeNT, DeCC, GENDEP studies; SCAN                        | DSM-IV MDD (recurrent in DeCC & DeNT; MDD FHx in DeNT)                                       | BIP, NAP, MDD related to SUD; BIP FHx                                           |
| RADIANT-GER 16         | rage           | Germany     | German outpatients from DeNT, DeCC, GENDEP studies; SCAN                    | DSM-IV MDD (recurrent in DeCC & DeNT; MDD FHx in DeNT)                                       | BIP, NAP, MDD related to SUD; BIP FHx                                           |
| SHIP 0 17              | shp0           | Germany     | Study of Health in Pomerania; CIDI                                          | DSM-IV MDD                                                                                   | BIP, MDD related to SUD                                                         |
| STAR*D 18              | stm2           | USA         | Outpatients in clinical trial; clinical interviews                          | DSM-IV MDD                                                                                   | BIP, NAP                                                                        |

Abbreviations: SCID=Structured Clinical Interview for DSM-IV, SADS=Schedule for Affective Disorders and Schizophrenia, MDD = major depressive disorder, BIP = bipolar disorder, NAP=non-affective psychosis, SUD = substance use disorder, MINI = MINI International Neuropsychiatric Interview, DIGS=Diagnostic Interview for Genetic Studies, FHx = family history, ID = intellectual disability, SCAN = Schedules for Clinical Assessment in Neuropsychiatry, OCD = obsessive compulsive disorder, PTSD = post-traumatic stress disorder, CIDI = Composite International Diagnostic Interview, sx = symptoms

### References Number Citation

- 1 Rietschel M et al. Genome-wide association-, replication-, and neuroimaging study implicates HOMER1 in the etiology of major depression. *Biol Psychiatry* 68, 578-85 (2010).
- 2 Krawczak M et al. PopGen: population-based recruitment of patients and controls for the analysis of complex genotype-phenotype relationships. *Community Genet* 9, 55-61 (2006).
- 3 Wichmann HE, Gieger C, Illig T & Group MKS. KORA-gen--resource for population genetics, controls and a broad spectrum of disease phenotypes. *Gesundheitswesen* 67 Suppl 1, S26-30 (2005).
- 4 Air T, Weightman MJ & Baune BT. Symptom severity of depressive symptoms impacts on social cognition performance in current but not remitted major depressive disorder. *Front Psychol* 6, 1118 (2015).
- 5 Preisig M et al. The PsyCoLaus study: methodology and characteristics of the sample of a population-based survey on psychiatric disorders and their association with genetic and cardiovascular risk factors. *BMC Psychiatry* 9, 9 (2009).
- 6 Shi J et al. Genome-wide association study of recurrent early-onset major depressive disorder. *Mol Psychiatry* 16, 193-201 (2011).
- 7 Levinson DF et al. Genetics of recurrent early-onset depression (GenRED): design and preliminary clinical characteristics of a repository sample for genetic linkage studies. *Am J Med Genet B Neuropsychiatr Genet* 119, 118-30 (2003).
- 8 Muglia P et al. Genome-wide association study of recurrent major depressive disorder in two European case-control cohorts. *Mol Psychiatry* 15, 589-601 (2010).
- 9 Kohli MA et al. The neuronal transporter gene SLC6A15 confers risk to major depression. *Neuron* 70, 252-65 (2011).
- 10 Ising M et al. A genomewide association study points to multiple loci that predict antidepressant drug treatment outcome in depression. *Arch Gen Psychiatry* 66, 966-75 (2009).
- 11 Hennings JM et al. Clinical characteristics and treatment outcome in a representative sample of depressed inpatients - findings from the Munich Antidepressant Response Signature (MARS) project. *J Psychiatr Res* 43, 215-29 (2009).
- 12 Nivard MG et al. Stability in symptoms of anxiety and depression as a function of genotype and environment: a longitudinal twin study from ages 3 to 63 years. *Psychol Med* 45, 1039-49 (2015).
- 13 Penninx BW et al. The Netherlands Study of Depression and Anxiety (NESDA): rationale, objectives and methods. *Int J Methods Psychiatr Res* 17, 121-40 (2008).
- 14 Major Depressive Disorder Working Group of the PGC. A mega-analysis of genome-wide association studies for major depressive disorder. *Molecular Psychiatry* 18, 497-511 (2013).
- 15 Cuellar-Partida G et al. WNT10A exonic variant increases the risk of keratoconus by decreasing corneal thickness. *Hum Mol Genet* 24, 5060-8 (2015).
- 16 Lewis CM et al. Genome-wide association study of major recurrent depression in the U.K. population. *Am J Psychiatry* 167, 949-57 (2010).
- 17 Volzke H et al. Cohort profile: the study of health in Pomerania. *Int J Epidemiol* 40, 294-307 (2011).
- 18 Shyn SI et al. Novel loci for major depression identified by genome-wide association study of Sequenced Treatment Alternatives to Relieve Depression and meta-analysis of three studies. *Mol Psychiatry* 16, 202-15 (2011).

**Table S2: Description of 21 bipolar disorder cohorts**

| Cohort (References)                                          | PGC label | Country    | Ascertainment and Evaluation of Cases                                                                                                                         | Inclusion criteria (lifetime) of Cases   | Exclusion criteria (lifetime) of Cases                                                                                                                          |
|--------------------------------------------------------------|-----------|------------|---------------------------------------------------------------------------------------------------------------------------------------------------------------|------------------------------------------|-----------------------------------------------------------------------------------------------------------------------------------------------------------------|
| BOMA-Germany I1-4                                            | bonn      | Germany    | Consecutive admissions to in-patient units, SCID-I, SADS-L, medical records, FHx, OPCRIT                                                                      | DSM-IV BIP I or BIP II                   |                                                                                                                                                                 |
| Trinity College Dublin 5                                     | dub1      | Ireland    | Hospitals and Community psychiatric facilities, SCID, case note review                                                                                        | DSM-IV BIP I                             |                                                                                                                                                                 |
| FaST, TGEN1, TGEN2 6                                         | fat2      | USA        | Hospitals, ADE, MINI                                                                                                                                          | DSM-IV BIP I or BIP II                   |                                                                                                                                                                 |
| French PGC2 6                                                | fran      | France     | DIGS, FIGS, medical case notes, mood scales, self-rating questionnaires assessing dimensions                                                                  | DSM-IV BIP I or BIP II                   |                                                                                                                                                                 |
| BACCs 7                                                      | gsk1      | UK, Canada | Advertisements in hospitals, clinics, primary care physician offices, patient support groups, SCAN CATEGO algorithm                                           | DSM-IV or ICD-10 BIP I or BIP II         | Dx of intravenous drug dependency/use, mood incongruent psychotic sx, manic episodes only with alcohol/substance abuse/dependence/medical illnesses/medications |
| Mayo Clinic 8                                                | may1      | USA        | Mayo Clinic Bipolar Biobank, patients ascertained through routine clinical appointments, in-patients in mood disorder units and recruitment advertising, SCID | DSM-IV-TR BIP I/ BIP II/ schizoaffective |                                                                                                                                                                 |
| Pritzker Neuropsychiatric Disorders Research Consortium 7, 9 | mich      | USA        | NIMH Genetics Initiative Repository, DIGS, FIGS, medical record review                                                                                        | DSM-III or IV BIP I                      | Suspected major depression                                                                                                                                      |
| STEP1 5,7                                                    | stp1      | USA        | ADE, MINI                                                                                                                                                     | DSM-IV BIP I                             |                                                                                                                                                                 |
| STEP2                                                        | stp2      | USA        | Hospitals, ADE, MINI                                                                                                                                          | DSM-IV BIP I or BIP II                   |                                                                                                                                                                 |
| TOP7 10                                                      | top7      | Norway     | Out-patient and in-patient psychiatric units, SCID-I, case note review, follow up interview                                                                   | DSM-IV BIP I, BIP II, SAB, BIP-NOS       | IQ score < 70                                                                                                                                                   |
| TOP8 10                                                      | top8      | Norway     | Out-patient and in-patient psychiatric units, SCID-I, case note review, follow up interview                                                                   | DSM-IV BIP I, BIP II, SAB, BIP-NOS       | IQ score < 70                                                                                                                                                   |
| UCL 5, 11                                                    | ucl       | UK         | Clinical diagnosis according to UK National Health Service (NHS) psychiatrists at interview, SADS-L, OPCRIT                                                   | DSM-IV BIP I                             |                                                                                                                                                                 |
| UMEA                                                         | ume4      | Sweden     | MINI, DIGS, FIGS, SCAN                                                                                                                                        | DSM-IV-TR BIP                            |                                                                                                                                                                 |
| WTCCC 5, 7, 12                                               | wfcc      | UK         | Individuals in contact with mental health services, SCAN                                                                                                      | RDC BIP I, BIP II, SAB, BIP-NOS          |                                                                                                                                                                 |
| GAIN 7, 13                                                   | gain      | USA        | Multiplex families, sibling pair families or individuals, DIGS, FIGS, medical records                                                                         | DSM-III-R & IV BIP I or SAB              |                                                                                                                                                                 |
| BOMA-Germany II 14                                           | bmg2      | Germany    | Consecutive admissions to in-patient units, AMDP, medical records, family history, OPCRIT                                                                     | DSM-IV lifetime BIP                      |                                                                                                                                                                 |
| BOMA-Germany III 14                                          | bmg3      | Germany    | Recruited from psychiatric hospitals, AMDP, CID-5, SADS-L, SCID, medical records, family history, OPCRIT                                                      | DSM-IV lifetime BIP                      |                                                                                                                                                                 |
| BOMA-Poland 14                                               | bmpo      | Poland     | Recruited from Department of Psychiatry, SCID                                                                                                                 | DSM-IV lifetime BIP                      |                                                                                                                                                                 |
| BOMA-Spain 14                                                | bmsp      | Spain      | Recruited from hospital mental health departments, SADS-L, OPCRIT, medical records, FISC                                                                      | DSM-IV and RDC BIP                       |                                                                                                                                                                 |
| Nova Scotia                                                  | hal2      | Canada     | Recruited from specialty mood disorder clinics, SADS-L                                                                                                        | DSM-IV and RDC BIP                       |                                                                                                                                                                 |
| BOMA-Romania 15                                              | rom3      | Romania    | Consecutive admissions to psychiatric hospital, DIGS, FIGS, medical records, family reports                                                                   | DSM-IV BIP I                             |                                                                                                                                                                 |

Abbreviations: SCID = Structured Clinical Interview for DSM-IV, SADS-L = Schedule for Affective Disorders and Schizophrenia Lifetime Version, FHx = family history, OPCRIT = Operational Criteria Checklist, BIP = bipolar disorder, ADE = Affective Disorders Evaluation, MINI = MINI International Neuropsychiatric Interview, DIGS = Diagnostic Interview for Genetic Studies, FIGS = Family Interview for Genetic Studies, SCAN = Schedules for Clinical Assessment in Neuropsychiatry, Dx = diagnosis, sx = symptoms, SAB = Seasonal affective disorder, BIP-NOS = bipolar disorder not otherwise specified, AMDP = Association Methodology and Documentation in Psychiatry, CID-5 = Composite International Diagnostic Screener, FISC = Family Informant Schedule and Criteria, RDC = Research Diagnostic Criteria

| References | Number | Citation                                                                                                                                                                                             |
|------------|--------|------------------------------------------------------------------------------------------------------------------------------------------------------------------------------------------------------|
|            | 1      | Baum, A.E. et al. A genome-wide association study implicates diacylglycerol kinase eta (DGKH) and several other genes in the etiology of bipolar disorder. <i>Mol Psychiatry</i> 13, 197-207 (2008). |
|            | 2      | Schulze, T.G. et al. Two variants in Ankyrin 3 (ANK3) are independent genetic risk factors for bipolar disorder. <i>Mol Psychiatry</i> 14, 487-91 (2009).                                            |
|            | 3      | Baum, A.E. et al. Meta-analysis of two genome-wide association studies of bipolar disorder reveals important points of agreement. <i>Mol Psychiatry</i> 13, 466-7 (2008).                            |
|            | 4      | McMahon, F.J. et al. Meta-analysis of genome-wide association data identifies a risk locus for major mood disorders on 3p21.1. <i>Nat Genet</i> 42, 128-31 (2010).                                   |
|            | 5      | Ferreira, M.A. et al. Collaborative genome-wide association analysis supports a role for ANK3 and CACNA1C in bipolar disorder. <i>Nat Genet</i> 40, 1056-8 (2008).                                   |
|            | 6      | Sklar, P. et al. Large-scale genome-wide association analysis of bipolar disorder identifies a new susceptibility locus near DD24. <i>Nat Genet</i> 43, 977-983 (2011).                              |
|            | 7      | Scott, L.J. et al. Genome-wide association and meta-analysis of bipolar disorder in individuals of European ancestry. <i>Proc Natl Acad Sci U S A</i> 106, 7501-6 (2009).                            |
|            | 8      | Frye, M.A. et al. Development of a bipolar disorder biobank: differential phenotyping for subsequent biomarker analyses. <i>Int J Bipolar Disord</i> 3, 14 (2015).                                   |
|            | 9      | Smith, E.N. et al. Genome-wide association study of bipolar disorder in European American and African American individuals. <i>Mol Psychiatry</i> 14, 755-63 (2009).                                 |
|            | 10     | Djurovic, S. et al. A genome-wide association study of bipolar disorder in Norwegian individuals, followed by replication in Icelandic sample. <i>J Affect Disord</i> 126, 312-316 (2010).           |
|            | 11     | Sklar, P. et al. Whole-genome association study of bipolar disorder. <i>Mol Psychiatry</i> 13, 558-69 (2008).                                                                                        |
|            | 12     | WTCCC. Genome-wide association study of 14,000 cases of seven common diseases and 3,000 shared controls. <i>Nature</i> 447, 661-78 (2007).                                                           |
|            | 13     | Smith, E.N. et al. Genome-wide association study of bipolar disorder in European American and African American individuals. <i>Mol Psychiatry</i> 14, 755-63 (2009).                                 |
|            | 14     | Mühlisen, T.W. et al. Genome-wide association study reveals two new risk loci for bipolar disorder. <i>Nat Commun</i> 11, 5:3339 (2014).                                                             |
|            | 15     | Cichon, S. et al. Genome-wide association study identifies genetic variation in neurocan as a susceptibility factor for bipolar disorder. <i>Am J Hum Genet</i> 88: 372-81 (2011).                   |

Table S3: Description of 9 schizophrenia cohorts

| Cohort (References)                   | PGC label | Country        | Ascertainment and Evaluation of Cases                                                     | Inclusion criteria (lifetime) of Cases    | Exclusion criteria (lifetime) of Cases                                                                          |
|---------------------------------------|-----------|----------------|-------------------------------------------------------------------------------------------|-------------------------------------------|-----------------------------------------------------------------------------------------------------------------|
| Bonn/ Mannheim 1                      | boco      | Germany        | Consecutive hospital admissions, SCID, SADS-L, OPCRIT, medical records, FHx               | DSM-IV SCZ                                |                                                                                                                 |
| Bulgaria 2                            | butr      | Bulgaria       | Family trios where proband had SCZ/ SA, SCAN                                              | DSM-IV SCZ / SA                           | Mental retardation                                                                                              |
| Denmark 1                             | denm      | Denmark        | Psychiatric departments and twin pair studies, OPCRIT                                     | ICD-10 SCZ                                | Mania/bipolar illness                                                                                           |
| Molecular Genetics of Schizophrenia 3 | mgs2      | USA, Australia | Clinical settings and community residences, DIGS 2.0, FIGS 2.0, Medical records           | DSM-IV SCZ / SA                           |                                                                                                                 |
| Munich 1                              | munc      | Germany        | Cases diagnosed with SCZ from the Munich area, SCID interview                             | DSM-IV SCZ                                | Head injury/ neurological diseases                                                                              |
| Portugal 4                            | port      | Portugal       | Probands from families segregating SCZ, DIGS, SIS, SANS, SAPS, OPCRIT                     | DSM-IV SCZ                                | Bipolar disorder                                                                                                |
| Thematic Organized Psychosis Research | top8      | Norway         | Out-patient and in-patient psychiatric units, SCID-I interview                            | DSM-IV SCZ/ SA/ schizophreniform disorder | IQ score < 70                                                                                                   |
| UCLA 1                                | ucla      | Netherlands    | Inpatients and outpatients recruited through psychiatric hospitals and institutions, CASH | DSM-IV SCZ                                | Short-term drug-induced psychoses, psychoses with learning disability/ head injury, other symptomatic psychoses |
| University College London 4           | uclo      | UK             | SCZ diagnosis recorded in medical case-history, SADS-L, RDC                               | ICD-10 SCZ                                | SA, bipolar disorder, schizomania                                                                               |

Abbreviations: SCID = Structured Clinical Interview for DSM-IV, SADS = Schedule for Affective Disorders and Schizophrenia, OPCRIT = Operational Criteria Checklist, FHx = family history, SCZ = schizophrenia, SA = schizoaffective disorder, SCAN = Schedules for Clinical Assessment in Neuropsychiatry, DIGS = Diagnostic Interview for Genetic Studies, FIGS = Family Interview for Genetic Studies, SIS = Kendler's Structured Interview for Schizotypy, SANS = Schedule for the Assessment of Negative Symptoms, SAPS = Schedule for the Assessment of Positive Symptoms, CASH = Comprehensive Assessment of Symptoms and History, RDC = Research Diagnostic Criteria

| References | Number | Citation                                                                                                                                                                                                      |
|------------|--------|---------------------------------------------------------------------------------------------------------------------------------------------------------------------------------------------------------------|
|            | 1      | Stefansson, H. <i>et al.</i> Common variants conferring risk of schizophrenia. <i>Nature</i> 460, 744-7 (2009).                                                                                               |
|            | 2      | Kirov G. <i>et al.</i> De novo CNV analysis implicates specific abnormalities of postsynaptic signalling complexes in the pathogenesis of schizophrenia. <i>Molecular Psychiatry</i> 17, 142-153 (2012).      |
|            | 3      | Shi, J. <i>et al.</i> Common variants on chromosome 6p22.1 are associated with schizophrenia. <i>Nature</i> 460, 753-7 (2009).                                                                                |
|            | 4      | International Schizophrenia Consortium. Rare chromosomal deletions and duplications increase risk of schizophrenia. <i>Nature</i> 455, 237-41 (2008).                                                         |
|            | 5      | Athanasou, L. <i>et al.</i> Gene variants associated with schizophrenia in a Norwegian genome-wide study are replicated in a large European cohort. <i>Journal of Psychiatric Research</i> 44, 748-53 (2010). |

**Table S4. Items on suicide from psychiatric interviews**

| Psychiatric Interview                                             | Section/ Question                                                | Information Collected                                                                                                                                                                                                                                                            |
|-------------------------------------------------------------------|------------------------------------------------------------------|----------------------------------------------------------------------------------------------------------------------------------------------------------------------------------------------------------------------------------------------------------------------------------|
| SCAN (Schedules for Clinical Assessment in Neuropsychiatry)       | 6.011 Suicide attempt and self-harm during episode of depression | 0=absent, 1=deliberately considered suicide or self-injury but made no attempt, 2= injured self or made an attempt but no serious harm results, 3 = as 2 but with serious self-harm, 4 = made an attempt at suicide designed to result in death                                  |
| SCID (Structured Clinical Interview for DSM-IV)                   | Sections on Depression, Mania, Mixed states                      | Recurrent thoughts of death (not just fear of dying), recurrent suicidal ideation without a specific plan, or a suicide attempt or a specific plan for committing suicide                                                                                                        |
| SADS (Schedule for Affective Disorders and Schizophrenia)         | Section O Suicidal Behavior                                      | Ever made a suicide attempt, describe the most serious attempt, most serious attempt is rated by the interviewer in terms of intent and lethality                                                                                                                                |
| DIGS (Diagnostic Interview for Genetic Studies)                   | Section O Suicidal Behavior                                      | Ever made a suicide attempt, describe the most serious attempt, medical treatment or hospitalisation required, whether the patient wanted to die or thought they would die, most serious attempt is rated by the interviewer in terms of intent and lethality                    |
| OPCRIT (Operational Criteria Checklist)                           | Past psychiatric history                                         | Ever made suicide attempt                                                                                                                                                                                                                                                        |
| MINI (MINI International Neuropsychiatric Interview)              | Section C Suicidality                                            | Lifetime suicide attempt, in the past month thoughts about suicide, suicide plan, suicide attempt, hoped to survive or expected to die                                                                                                                                           |
| CIDI (Composite International Diagnostic Interview)               | Section on Major Depression                                      | During worst two weeks in the last 12 months - thought about committing suicide, suicide plan, suicide attempt                                                                                                                                                                   |
| SSAGA (Semi-Structured Assessment for the Genetics of Alcoholism) | Section I Depression, Section N Suicidal Behavior                | Thoughts of death or suicide, suicide plan, suicide attempt, describe the most serious attempt, method, medical treatment, hospitalisation, whether the patient wanted to die or thought they would die, interviewer rates both the lethality and intent from unclear to extreme |
| FIGS (Family Interview for Genetic Studies)                       | During depression                                                | Did the family member talk about death or suicide, try suicide                                                                                                                                                                                                                   |
| CASH (Comprehensive Assessment of Symptoms and History)           | Major Depressive Syndrome                                        | Thoughts about death and suicide, plus possible wishes to be dead, suicide plans, suicide attempts, rated from mild to severe                                                                                                                                                    |

**Table S5: Summary of polygenic risk scoring analyses with arrows showing direction from discovery to test dataset**

| <b>Test for genetic overlap between psychiatric disorders and suicide attempt in the same disorder</b> |   |                                       |
|--------------------------------------------------------------------------------------------------------|---|---------------------------------------|
| PGC BIP 1                                                                                              | → | Suicide attempt vs non-attempt in BIP |
| PGC Major Depression 2                                                                                 | → | Suicide attempt vs non-attempt in MDD |
| PGC SCZ 3                                                                                              | → | Suicide attempt vs non-attempt in SCZ |
| <b>Test for genetic overlap between major depression and suicide attempt in other disorders</b>        |   |                                       |
| PGC Major Depression 2                                                                                 | → | Suicide attempt vs non-attempt in BIP |
| PGC Major Depression 2                                                                                 | → | Suicide attempt vs non-attempt in SCZ |
| <b>Test for genetic overlap in suicide attempt across psychiatric disorders</b>                        |   |                                       |
| Suicide attempt vs non-attempt in BIP                                                                  | ↔ | Suicide attempt vs non-attempt in MDD |
| Suicide attempt vs non-attempt in BIP                                                                  | ↔ | Suicide attempt vs non-attempt in SCZ |
| Suicide attempt vs non-attempt in SCZ                                                                  | ↔ | Suicide attempt vs non-attempt in MDD |

PGC, Psychiatric Genomics Consortium; BIP, bipolar disorder; MDD, major depressive disorder, SCZ, schizophrenia. 1. Stahl et al. Genomewide association study identifies 30 loci associated with bipolar disorder. *bioRxiv*, 2017. 2. Wray et al. Genome-wide association analyses identify 44 risk variants and refine the genetic architecture of major depression. *Nat Genet.* 2018;50(5):668-81. 3. Schizophrenia Working Group of the Psychiatric Genomics Consortium. Biological insights from 108 schizophrenia-associated genetic loci. *Nature.* 2014;511(7510):421-7.

**Table S6: Summary of suicide attempt in major depressive disorder cohorts \***

| Cohort       | N Suicide attempters | N Non-attempters |
|--------------|----------------------|------------------|
| CoFaMS       | 27                   | 74               |
| PsyCoLaus    | 65                   | 442              |
| GenRED2      | 168                  | 653              |
| GSK MPIP     | 115                  | 763              |
| MARS 650     | 137                  | 407              |
| MARS OMNIex  | 38                   | 187              |
| NTR/NESDA    | 229                  | 1146             |
| QIMR I317    | 61                   | 521              |
| QIMR I610    | 32                   | 263              |
| QIMR COEX    | 48                   | 299              |
| RADIANT-UK   | 150                  | 1424             |
| RADIANT-Ger  | 35                   | 276              |
| STAR*D       | 126                  | 807              |
| BOMA         | 170                  | 361              |
| SHIP 0       | 18                   | 348              |
| GenRED1      | 203                  | 815              |
| <b>Total</b> | <b>1622</b>          | <b>8786</b>      |

\*Individuals missing information on suicide attempt were excluded.

**Table S7: Summary of suicide attempt in bipolar disorder cohorts\***

| Cohort                                                  | N Suicide attempters | N Non-attempters |
|---------------------------------------------------------|----------------------|------------------|
| BOMA-Germany I                                          | 241                  | 365              |
| Trinity College Dublin                                  | 26                   | 26               |
| FaST, TGEN1, TGEN2                                      | 120                  | 124              |
| French PGC2                                             | 185                  | 254              |
| BACCs                                                   | 77                   | 505              |
| Mayo Clinic                                             | 307                  | 610              |
| Pritzker Neuropsychiatric Disorders Research Consortium | 161                  | 310              |
| STEP2                                                   | 170                  | 363              |
| STEP1                                                   | 392                  | 453              |
| TOP7                                                    | 116                  | 207              |
| TOP8                                                    | 48                   | 94               |
| UCL                                                     | 182                  | 74               |
| UMEA                                                    | 74                   | 124              |
| WTCCC                                                   | 423                  | 673              |
| GAIN                                                    | 233                  | 277              |
| BOMA-Germany II                                         | 62                   | 119              |
| BOMA-Germany III                                        | 132                  | 234              |
| Boma Poland                                             | 150                  | 251              |
| Boma Spain                                              | 22                   | 66               |
| Nova Scotia Canada                                      | 78                   | 223              |
| BOMA Romania                                            | 65                   | 148              |
| <b>Total</b>                                            | <b>3264</b>          | <b>5500</b>      |

\*Individuals missing information on suicide attempt were excluded.

**Table S8: Summary of suicide attempt in schizophrenia cohorts\***

| Cohorts                                     | N Suicide attempters | N Non-attempters |
|---------------------------------------------|----------------------|------------------|
| Bonn/ Mannheim                              | 287                  | 310              |
| Bulgaria                                    | 103                  | 208              |
| Denmark                                     | 28                   | 98               |
| Molecular Genetics of Schizophrenia         | 754                  | 1202             |
| Munich                                      | 156                  | 263              |
| Portugal                                    | 80                   | 243              |
| Thematic Organized Psychosis Research Study | 100                  | 214              |
| UCLA                                        | 86                   | 304              |
| University College London                   | 89                   | 104              |
| <b>Total</b>                                | <b>1683</b>          | <b>2946</b>      |

\*Individuals missing information on suicide attempt were excluded.

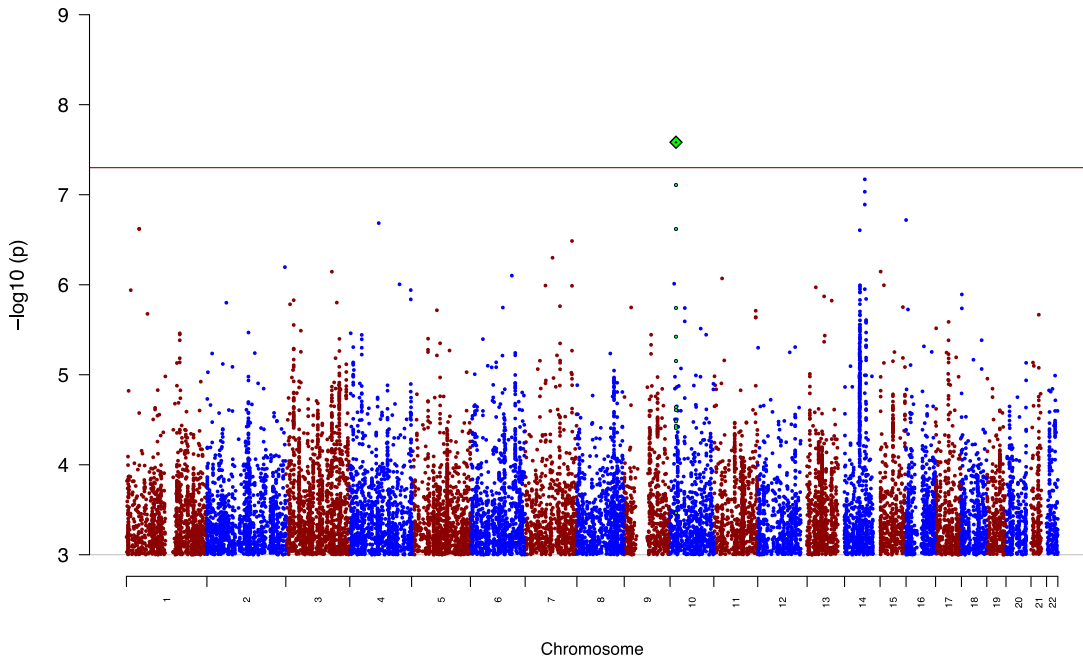

**Figure S1: Manhattan plot from GWAS of suicide attempt in major depressive disorder**

**Table S9: Top 20 results from GWAS of suicide attempt in major depressive disorder showing the most significant SNP from each genomic region**

| Variant          | CHR | BP        | A1/A2 | A1 freq attempters | A1 freq non-attempters | P value         | OR (C.I.)       | Direction in each cohort |
|------------------|-----|-----------|-------|--------------------|------------------------|-----------------|-----------------|--------------------------|
| rs45593736       | 10  | 18954937  | A/G   | 0.02               | 0.01                   | <b>2.61E-08</b> | 2.38(1.75-3.23) | +++?+++++?+-?+           |
| rs111625585      | 14  | 82804332  | T/C   | 0.08               | 0.06                   | 6.75E-08        | 1.57(1.33-1.84) | +++++-----+-----         |
| rs116428372      | 16  | 589359    | A/G   | 0.07               | 0.06                   | 1.91E-07        | 1.74(1.41-2.14) | +++++-----+-----         |
| rs77033326       | 4   | 89777618  | A/G   | 0.03               | 0.02                   | 2.07E-07        | 2.24(1.65-3.03) | +-----+-----+-----       |
| rs183414028      | 1   | 40442026  | T/C   | 0.98               | 0.99                   | 2.39E-07        | 0.39(0.27-0.56) | -----+-----              |
| rs113330417      | 14  | 67249421  | A/G   | 0.96               | 0.98                   | 2.48E-07        | 0.57(0.46-0.71) | -----+-----              |
| rs111367251      | 7   | 144968289 | C/G   | 0.98               | 0.99                   | 3.26E-07        | 0.45(0.33-0.61) | -?+-----+-----           |
| rs62460873       | 7   | 84977966  | T/C   | 0.98               | 0.99                   | 5.01E-07        | 0.37(0.25-0.54) | ?-???-?-----+-----       |
| rs186736781      | 2   | 240473090 | T/C   | 0.03               | 0.02                   | 6.37E-07        | 2.27(1.64-3.13) | +?+?+-----+-----         |
| chr15_24344805_D | 15  | 24344805  | D/I3  | 0.37               | 0.41                   | 7.14E-07        | 0.79(0.73-0.87) | -----+-----+-----        |
| rs111326206      | 3   | 142438431 | T/C   | 0.95               | 0.97                   | 7.16E-07        | 0.62(0.51-0.75) | +-----+?+-----           |
| chr6_128178230_I | 6   | 128178230 | I2/D  | 0.08               | 0.06                   | 7.92E-07        | 1.58(1.32-1.90) | -----+-----              |
| rs184924771      | 11  | 25885205  | A/C   | 0.98               | 0.99                   | 8.51E-07        | 0.39(0.27-0.57) | -?+?+-----+-----         |
| rs113386487      | 10  | 13358583  | A/T   | 0.97               | 0.98                   | 9.73E-07        | 0.47(0.35-0.64) | -?+?+-----+-----         |
| rs13137453       | 4   | 153907879 | A/G   | 0.97               | 0.98                   | 9.88E-07        | 0.46(0.34-0.63) | -?+?+-----+-----         |
| rs9972552        | 15  | 34396913  | A/C   | 0.03               | 0.02                   | 1.01E-06        | 2.18(1.59-2.98) | +-----+-----+-----       |
| rs191852465      | 7   | 63164142  | T/C   | 0.96               | 0.97                   | 1.02E-06        | 0.46(0.34-0.63) | +-----+-----+-----       |
| chr13_46256859_D | 13  | 46256859  | D/I6  | 0.02               | 0.01                   | 1.07E-06        | 2.27(1.63-3.16) | -----+?+-----+-----      |
| rs145440507      | 4   | 188400537 | A/T   | 0.98               | 0.99                   | 1.15E-06        | 0.37(0.25-0.55) | -?+?+-----+-----         |
| rs76347430       | 1   | 14395819  | A/G   | 0.97               | 0.98                   | 1.15E-06        | 0.50(0.38-0.66) | ?-?+-----+-----          |

CHR, chromosome; BP, basepair position; freq, frequency; OR, odds ratio; CI, confidence interval

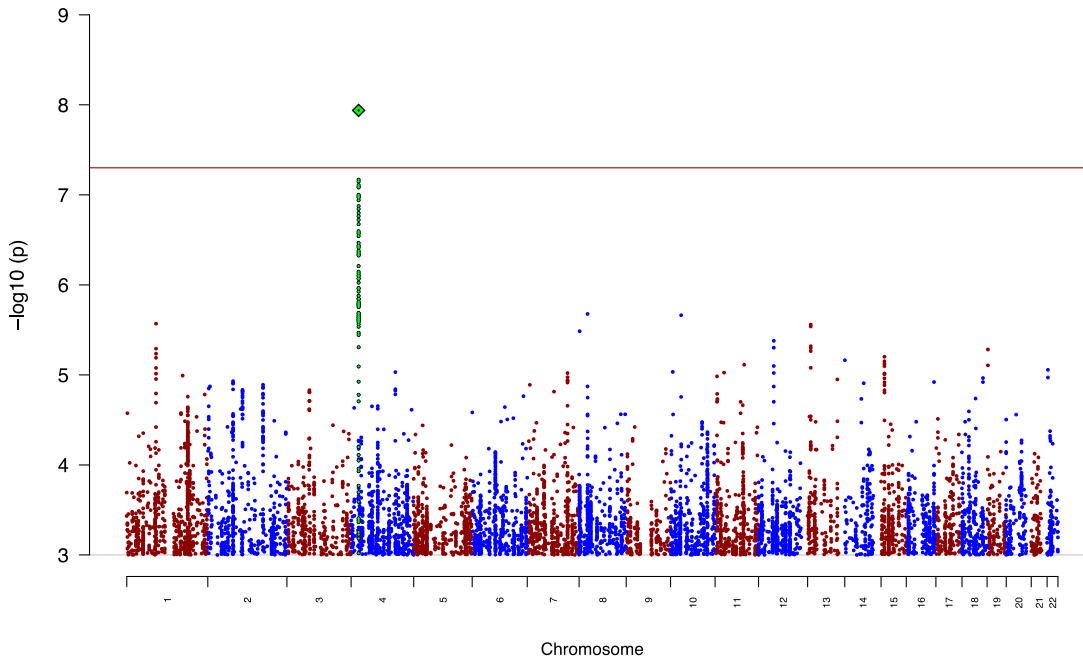

Figure S2: Manhattan plot from GWAS of suicide attempt in bipolar disorder

Table S10: Top 20 results from GWAS of suicide attempt in bipolar disorder showing the most significant SNP from each genomic region

| Variant          | CHR | BP        | A1/A2 | A1 freq attempters | A1 freq non-attempters | P value         | OR (C.I.)       | Direction in each cohort |
|------------------|-----|-----------|-------|--------------------|------------------------|-----------------|-----------------|--------------------------|
| chr4_23273116_D  | 4   | 23273116  | D/I10 | 0.20               | 0.17                   | <b>1.15E-08</b> | 1.29(1.18-1.40) | +++++++-----             |
| rs1052873        | 8   | 27667793  | T/C   | 0.19               | 0.22                   | 2.10E-06        | 0.83(0.76-0.89) | -----                    |
| rs118167891      | 10  | 32946009  | T/C   | 0.02               | 0.02                   | 2.17E-06        | 1.93(1.47-2.53) | +++++?+---               |
| rs6428588        | 1   | 90825206  | T/C   | 0.30               | 0.34                   | 2.69E-06        | 0.85(0.79-0.91) | -----                    |
| rs7982251        | 13  | 28909835  | T/C   | 0.85               | 0.87                   | 2.76E-06        | 0.79(0.72-0.87) | -----+---                |
| rs67658161       | 8   | 3286733   | A/C   | 0.48               | 0.44                   | 3.27E-06        | 1.16(1.09-1.24) | +++++-----               |
| rs7979008        | 12  | 47479528  | A/C   | 0.31               | 0.34                   | 4.18E-06        | 0.85(0.79-0.91) | -----+---                |
| rs55893662       | 19  | 2955759   | T/C   | 0.11               | 0.10                   | 5.22E-06        | 1.46(1.24-1.73) | +++++-----               |
| rs5016373        | 15  | 34314041  | T/C   | 0.61               | 0.65                   | 6.28E-06        | 0.86(0.80-0.92) | -----+---                |
| rs190572487      | 14  | 19675351  | T/C   | 0.75               | 0.73                   | 6.86E-06        | 1.35(1.18-1.54) | +++++-----               |
| rs3847511        | 11  | 91454034  | T/G   | 0.08               | 0.06                   | 7.70E-06        | 1.36(1.19-1.55) | +++++-----               |
| rs165774         | 22  | 19952561  | A/G   | 0.33               | 0.30                   | 8.78E-06        | 1.18(1.10-1.27) | +++++-----               |
| chr10_7228436_I  | 10  | 7228436   | I2/D  | 0.14               | 0.12                   | 9.25E-06        | 1.31(1.16-1.47) | -----                    |
| rs12639760       | 4   | 135958271 | A/T   | 0.22               | 0.19                   | 9.31E-06        | 1.21(1.11-1.31) | +++++-----               |
| rs141199126      | 11  | 29761274  | T/C   | 0.02               | 0.01                   | 9.43E-06        | 2.05(1.49-2.83) | +++++?+?+---             |
| chr7_123745464_I | 7   | 123745464 | I2/D  | 0.08               | 0.07                   | 9.54E-06        | 1.32(1.17-1.49) | -----                    |
| chr1_172543621_I | 1   | 172543621 | I2/D  | 0.03               | 0.04                   | 1.02E-05        | 0.60(0.47-0.75) | +++++-----               |
| rs12799429       | 11  | 8097070   | T/C   | 0.54               | 0.56                   | 1.04E-05        | 0.86(0.80-0.92) | -----+---                |
| rs17077064       | 18  | 64976306  | T/C   | 0.83               | 0.80                   | 1.08E-05        | 1.21(1.11-1.31) | +++++-----               |
| rs117018753      | 13  | 110581806 | T/C   | 0.07               | 0.06                   | 1.12E-05        | 1.37(1.19-1.58) | +++++-----               |

CHR, chromosome; BP, basepair position; freq, frequency; OR, odds ratio; CI, confidence interval



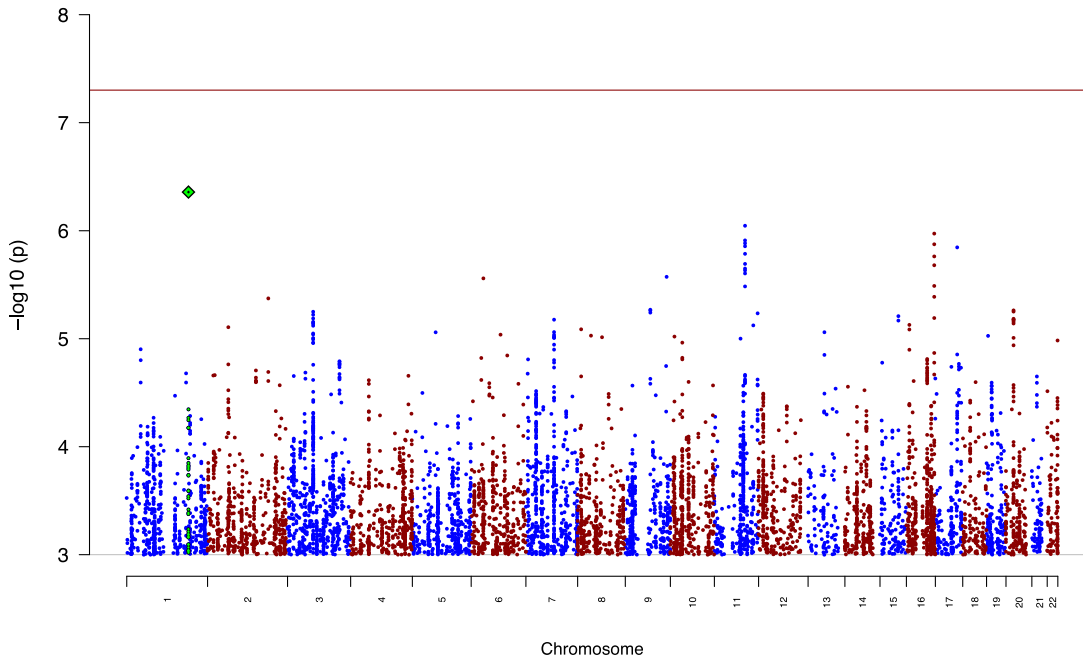

**Figure S3: Manhattan plot from GWAS of suicide attempt in schizophrenia**

**Table S11: Top 20 results from GWAS of suicide attempt in schizophrenia showing the most significant SNP from each genomic region**

| Variant           | CHR | BP        | A1/A2 | A1 freq<br>attempters | A1 freq non-<br>attempters | P value  | OR (C.I.)       | Direction in each cohort |
|-------------------|-----|-----------|-------|-----------------------|----------------------------|----------|-----------------|--------------------------|
| rs482039          | 1   | 190777567 | T/C   | 0.03                  | 0.02                       | 4.39E-07 | 2.37(1.70-3.31) | +++++                    |
| rs3858375         | 11  | 95077167  | T/C   | 0.07                  | 0.05                       | 8.99E-07 | 1.60(1.33-1.94) | +++++                    |
| rs4843180         | 16  | 86753070  | T/C   | 0.44                  | 0.39                       | 1.06E-06 | 1.25(1.14-1.36) | +++++                    |
| rs180697792       | 17  | 67294430  | A/G   | 0.23                  | 0.20                       | 1.43E-06 | 1.34(1.19-1.50) | +++++                    |
| rs72756712        | 9   | 128902906 | A/G   | 0.93                  | 0.95                       | 2.67E-06 | 0.60(0.49-0.74) | -----                    |
| rs191312301       | 6   | 38975727  | A/C   | 0.86                  | 0.89                       | 2.76E-06 | 0.71(0.62-0.82) | -----                    |
| chr2_188481671_D  | 2   | 188481671 | D/I3  | 0.34                  | 0.38                       | 4.23E-06 | 0.79(0.71-0.87) | -----                    |
| rs73650494        | 9   | 78831443  | T/C   | 0.96                  | 0.98                       | 5.39E-06 | 0.56(0.43-0.72) | -----                    |
| rs6114731         | 20  | 24427180  | A/G   | 0.04                  | 0.03                       | 5.46E-06 | 1.78(1.39-2.27) | +++++                    |
| rs75305337        | 3   | 84333133  | A/C   | 0.12                  | 0.09                       | 5.63E-06 | 1.39(1.20-1.60) | +++++                    |
| chr11_133764404_I | 11  | 133764404 | I5/D  | 0.79                  | 0.75                       | 5.82E-06 | 1.29(1.15-1.43) | -----                    |
| rs57729539        | 15  | 78524199  | A/G   | 0.80                  | 0.83                       | 6.18E-06 | 0.76(0.68-0.86) | -----                    |
| rs875777          | 7   | 86745380  | T/C   | 0.16                  | 0.20                       | 6.66E-06 | 0.76(0.67-0.86) | -----                    |
| rs6497871         | 16  | 10364163  | A/G   | 0.64                  | 0.60                       | 7.44E-06 | 1.24(1.13-1.37) | +++++                    |
| rs151336980       | 11  | 120470737 | T/C   | 0.04                  | 0.03                       | 7.52E-06 | 1.78(1.38-2.29) | +++++                    |
| rs4494728         | 2   | 65589513  | T/C   | 0.50                  | 0.55                       | 7.82E-06 | 0.82(0.75-0.89) | -----                    |
| rs2739958         | 8   | 12232534  | T/C   | 0.58                  | 0.60                       | 8.18E-06 | 0.68(0.57-0.80) | -----                    |
| rs73215273        | 13  | 72403250  | A/C   | 0.88                  | 0.90                       | 8.71E-06 | 0.66(0.54-0.79) | -----                    |
| rs11739808        | 5   | 72745041  | A/G   | 0.03                  | 0.02                       | 8.72E-06 | 2.30(1.59-3.31) | +++++                    |
| rs13198361        | 6   | 91673413  | T/C   | 0.11                  | 0.14                       | 9.17E-06 | 0.65(0.54-0.79) | -----                    |

CHR, chromosome; BP, basepair position; freq, frequency; OR, odds ratio; CI, confidence interval

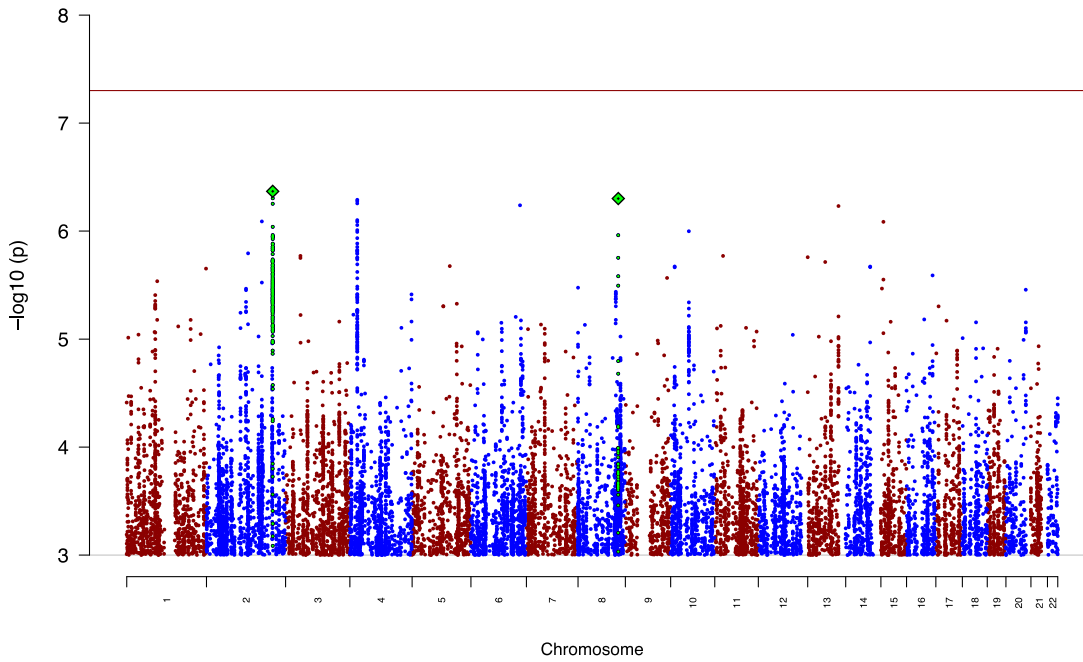

**Figure S4: Manhattan plot from meta-analysis of suicide attempt in major depressive disorder, bipolar disorder and schizophrenia**

**Table S12: Top 20 results from meta-analysis of suicide attempt in MDD, BIP and SCZ showing the most significant SNP from each genomic region**

| Variant          | CHR | BP        | A1/A2 | A1 freq attempters | A1 freq non-attempters | P value  | OR (C.I.)       | Direction in each cohort |
|------------------|-----|-----------|-------|--------------------|------------------------|----------|-----------------|--------------------------|
| rs149268645      | 2   | 203833018 | A/G   | 0.14               | 0.15                   | 4.28E-07 | 0.85(0.80-0.90) | ---                      |
| rs4870888        | 8   | 125108977 | T/C   | 0.52               | 0.54                   | 5.00E-07 | 0.89(0.86-0.93) | ---                      |
| chr4_23273116_D  | 4   | 23273116  | D/I   | 0.19               | 0.18                   | 5.13E-07 | 1.16(1.09-1.23) | +++                      |
| rs141252918      | 6   | 151828058 | A/G   | 0.02               | 0.01                   | 5.76E-07 | 1.73(1.39-2.14) | +++                      |
| rs9577511        | 13  | 113991823 | A/G   | 0.86               | 0.87                   | 5.86E-07 | 0.83(0.77-0.89) | ---                      |
| rs62173322       | 2   | 170611029 | A/G   | 0.86               | 0.87                   | 8.13E-07 | 0.84(0.78-0.90) | ---                      |
| rs76371172       | 15  | 31814455  | T/G   | 0.98               | 0.98                   | 8.20E-07 | 0.61(0.50-0.74) | ---                      |
| rs11004733       | 10  | 56849344  | T/C   | 0.04               | 0.04                   | 1.00E-06 | 1.34(1.19-1.50) | +++                      |
| rs138689899      | 2   | 128288162 | T/C   | 0.02               | 0.02                   | 1.61E-06 | 1.53(1.29-1.82) | ++-                      |
| rs142055939      | 3   | 45995554  | T/C   | 0.02               | 0.02                   | 1.69E-06 | 1.48(1.26-1.75) | +++                      |
| rs35107435       | 11  | 27249330  | A/T   | 0.16               | 0.15                   | 1.70E-06 | 1.17(1.10-1.24) | +++                      |
| rs113988902      | 13  | 19525105  | T/C   | 0.05               | 0.04                   | 1.74E-06 | 1.52(1.28-1.80) | ?++                      |
| chr13_73243177_I | 13  | 73243177  | I/D   | 0.04               | 0.03                   | 1.93E-06 | 1.59(1.32-1.93) | ?--                      |
| rs186672572      | 5   | 116878032 | T/C   | 0.02               | 0.01                   | 2.11E-06 | 1.64(1.33-2.00) | +++                      |
| rs113386487      | 10  | 13358583  | A/T   | 0.98               | 0.98                   | 2.12E-06 | 0.67(0.56-0.79) | ---                      |
| rs73348245       | 14  | 96158072  | A/G   | 0.06               | 0.06                   | 2.13E-06 | 1.27(1.15-1.40) | +++                      |
| rs6426297        | 1   | 246538381 | T/C   | 0.02               | 0.01                   | 2.22E-06 | 1.65(1.34-2.04) | +++                      |
| rs73577700       | 16  | 80280761  | A/T   | 0.83               | 0.85                   | 2.57E-06 | 0.87(0.82-0.92) | ---                      |
| rs72756712       | 9   | 128902906 | A/G   | 0.94               | 0.95                   | 2.71E-06 | 0.78(0.70-0.86) | ---                      |
| rs75633108       | 1   | 96735185  | T/C   | 0.02               | 0.02                   | 2.91E-06 | 1.59(1.31-1.93) | +++                      |

MDD, major depressive disorder; BIP, bipolar disorder; SCZ, schizophrenia; CHR, chromosome; BP, basepair position; OR, odds ratio; CI, confidence interval

**Table S13: Top 20 results from meta-analysis of suicide attempt in mood disorders showing the most significant SNP from each genomic region**

| Variant          | CHR | BP        | A1/A2 | A1 freq<br>attempters | A1 freq<br>non-attempters | P value         | OR (C.I.)       | Direction in each cohort |
|------------------|-----|-----------|-------|-----------------------|---------------------------|-----------------|-----------------|--------------------------|
| rs138689899      | 2   | 128288162 | T/C   | 0.02                  | 0.01                      | <b>2.50E-08</b> | 1.75(1.44-2.14) | ++                       |
| rs28591567       | 4   | 23253912  | A/G   | 0.78                  | 0.80                      | <b>3.11E-08</b> | 0.84(0.79-0.89) | --                       |
| chr6_151835609_D | 6   | 151835609 | I/D   | 0.94                  | 0.95                      | 3.66E-07        | 0.74(0.66-0.83) | ++                       |
| chr13_61834504_D | 13  | 61834504  | I/D   | 0.91                  | 0.92                      | 5.77E-07        | 0.78(0.71-0.86) | ++                       |
| rs186672572      | 5   | 116878032 | T/C   | 0.02                  | 0.01                      | 7.19E-07        | 1.78(1.42-2.24) | ++                       |
| rs112944737      | 8   | 134677667 | T/C   | 0.91                  | 0.92                      | 1.11E-06        | 0.80(0.73-0.87) | --                       |
| rs9577511        | 13  | 113991823 | A/G   | 0.86                  | 0.87                      | 1.35E-06        | 0.81(0.75-0.88) | --                       |
| rs150795632      | 6   | 37439376  | A/G   | 0.98                  | 0.98                      | 1.69E-06        | 0.59(0.48-0.73) | --                       |
| rs113051785      | 11  | 20167807  | C/G   | 0.02                  | 0.01                      | 1.70E-06        | 1.75(1.39-2.20) | ++                       |
| rs1355048        | 1   | 90830490  | T/C   | 0.37                  | 0.40                      | 1.91E-06        | 0.88(0.84-0.93) | --                       |
| rs115833694      | 4   | 99918226  | C/G   | 0.98                  | 0.98                      | 1.99E-06        | 0.63(0.52-0.76) | --                       |
| rs17764923       | 6   | 159820779 | A/G   | 0.16                  | 0.14                      | 2.04E-06        | 1.19(1.11-1.27) | ++                       |
| rs117020391      | 12  | 107099751 | T/C   | 0.98                  | 0.98                      | 2.09E-06        | 0.63(0.52-0.76) | --                       |
| rs72832403       | 2   | 115551269 | A/G   | 0.92                  | 0.93                      | 2.16E-06        | 0.79(0.72-0.87) | --                       |
| rs150320200      | 4   | 23450330  | A/G   | 0.97                  | 0.98                      | 2.19E-06        | 0.66(0.55-0.78) | --                       |
| rs114598476      | 1   | 224438315 | A/G   | 0.96                  | 0.97                      | 2.30E-06        | 0.67(0.57-0.79) | --                       |
| rs76400344       | 22  | 26697120  | A/C   | 0.03                  | 0.02                      | 3.01E-06        | 1.52(1.28-1.82) | ++                       |
| chr2_124851208_D | 2   | 124851208 | I/D   | 0.96                  | 0.96                      | 3.48E-06        | 0.72(0.62-0.82) | ++                       |
| rs143457262      | 7   | 82072544  | A/G   | 0.03                  | 0.03                      | 4.16E-06        | 1.51(1.26-1.79) | ++                       |
| rs3829881        | 1   | 117531813 | T/C   | 0.49                  | 0.47                      | 4.45E-06        | 1.12(1.07-1.18) | ++                       |

CHR, chromosome; BP, basepair position; freq, frequency; OR, odds ratio; CI, confidence interval

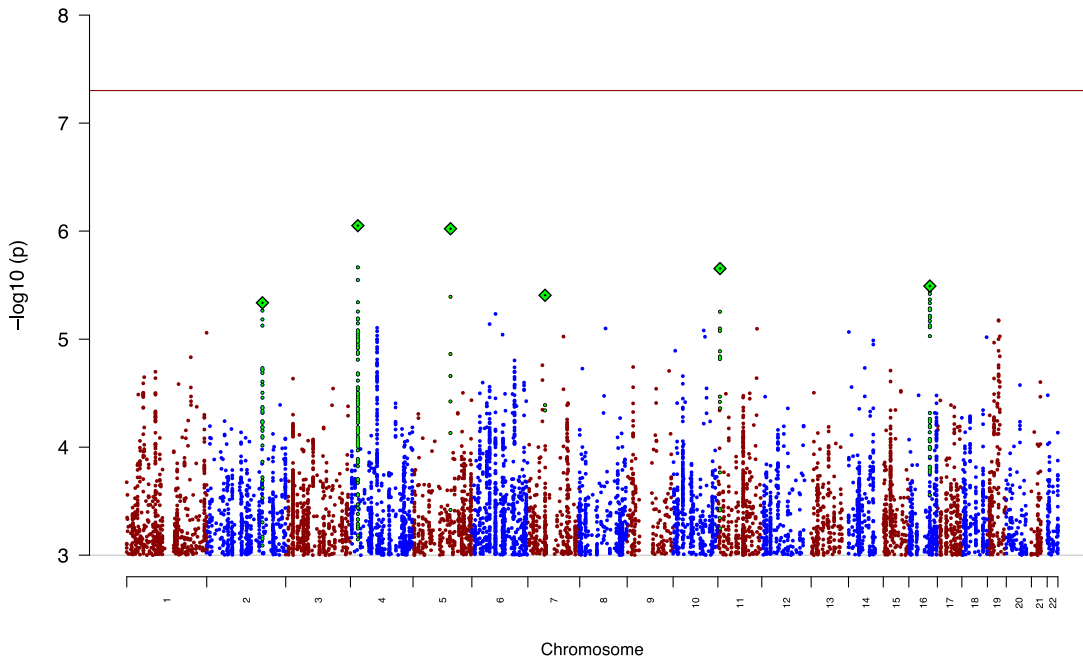

**Figure S5: Manhattan plot from meta-analysis of suicide attempt in bipolar disorder and schizophrenia**

**Table S14: Top 20 results from meta-analysis of suicide attempt in BIP and SCZ showing the most significant SNP from each genomic region**

| Variant         | CHR | BP        | A1/A2 | A1 freq<br>attempters | A1 freq<br>non-attempters | P value  | OR (C.I.)       | Direction in each cohort |
|-----------------|-----|-----------|-------|-----------------------|---------------------------|----------|-----------------|--------------------------|
| chr4_23273116_D | 4   | 23273116  | D/I   | 0.19                  | 0.17                      | 8.90E-07 | 1.19(1.11-1.27) | ++                       |
| rs26318         | 5   | 115687905 | T/C   | 0.98                  | 0.99                      | 9.50E-07 | 0.52(0.40-0.67) | --                       |
| rs118102650     | 11  | 9099847   | A/G   | 0.02                  | 0.01                      | 2.22E-06 | 1.79(1.41-2.28) | ++                       |
| rs12925656      | 16  | 65107920  | T/C   | 0.88                  | 0.90                      | 3.22E-06 | 0.82(0.76-0.89) | --                       |
| rs73122740      | 7   | 53695512  | T/G   | 0.92                  | 0.91                      | 3.93E-06 | 1.26(1.14-1.39) | ++                       |
| rs2353181       | 2   | 170305256 | T/C   | 0.95                  | 0.94                      | 4.61E-06 | 1.33(1.17-1.49) | ++                       |
| rs75237141      | 6   | 72966596  | A/G   | 0.90                  | 0.92                      | 5.84E-06 | 0.80(0.73-0.88) | --                       |
| rs56342621      | 19  | 35071781  | C/G   | 0.98                  | 0.99                      | 6.67E-06 | 0.61(0.49-0.75) | --                       |
| rs9475195       | 6   | 55061018  | T/C   | 0.58                  | 0.61                      | 7.25E-06 | 0.89(0.84-0.93) | --                       |
| chr4_82106147_I | 4   | 82106147  | I/D   | 0.07                  | 0.06                      | 7.85E-06 | 1.29(1.15-1.44) | --                       |
| chr8_80591790_D | 8   | 80591790  | I/D   | 0.61                  | 0.63                      | 7.95E-06 | 0.88(0.83-0.93) | ++                       |
| rs10892827      | 11  | 122210990 | T/G   | 0.90                  | 0.92                      | 8.01E-06 | 0.80(0.73-0.88) | --                       |
| rs189924441     | 10  | 94182243  | A/G   | 0.97                  | 0.97                      | 8.30E-06 | 0.67(0.56-0.80) | --                       |
| rs8022689       | 14  | 21608986  | A/G   | 0.38                  | 0.35                      | 8.58E-06 | 1.14(1.07-1.20) | ++                       |
| rs3007305       | 1   | 246862572 | C/G   | 0.66                  | 0.68                      | 8.72E-06 | 0.88(0.83-0.93) | --                       |
| rs72924216      | 6   | 94570858  | A/G   | 0.95                  | 0.96                      | 9.08E-06 | 0.72(0.63-0.83) | --                       |
| rs66666015      | 19  | 38717143  | T/C   | 0.76                  | 0.74                      | 9.42E-06 | 1.16(1.09-1.24) | ++                       |
| rs38758         | 7   | 109943767 | A/C   | 0.47                  | 0.44                      | 9.46E-06 | 1.12(1.07-1.18) | ++                       |
| rs117559494     | 10  | 98008526  | A/G   | 0.03                  | 0.03                      | 9.50E-06 | 1.53(1.27-1.85) | ++                       |
| rs117637007     | 18  | 75827605  | T/C   | 0.11                  | 0.13                      | 9.58E-06 | 0.80(0.72-0.88) | --                       |

CHR, chromosome; BP, basepair position; freq, frequency; OR, odds ratio; CI, confidence interval

**Table S15: Genome-wide significant loci for suicide attempt tested in independent replication cohorts**

| Cohort     | Variant      | CHR | A1/A2 | P value | OR (C.I.)        |
|------------|--------------|-----|-------|---------|------------------|
| UK Biobank | rs45593736   | 10  | A/G   | 0.985   | 1.00 (0.83-1.21) |
| UK Biobank | rs138689899  | 2   | T/C   | 0.677   | 0.96 (0.79-1.16) |
| UK Biobank | rs4626184^   | 4   | C/A   | 0.663   | 1.04 (0.86-1.26) |
| iPSYCH     | rs117607218* | 10  | C/T   | 0.776   | 0.97 (0.79-1.18) |
| iPSYCH     | rs138689899  | 2   | T/C   | 0.228   | 0.87 (0.69-1.09) |
| iPSYCH     | rs28591567   | 4   | G/A   | 0.521   | 1.02 (0.96-1.07) |

^rs28591567 was not present in the UK Biobank dataset, so the SNP in highest LD ( $R^2 = 0.88$ ) was chosen.

\*rs45593736 was not present in the iPSYCH dataset, so the SNP in highest LD ( $R^2 = 0.60$ ) was chosen.

CHR, chromosome; OR, odds ratio; CI, confidence interval

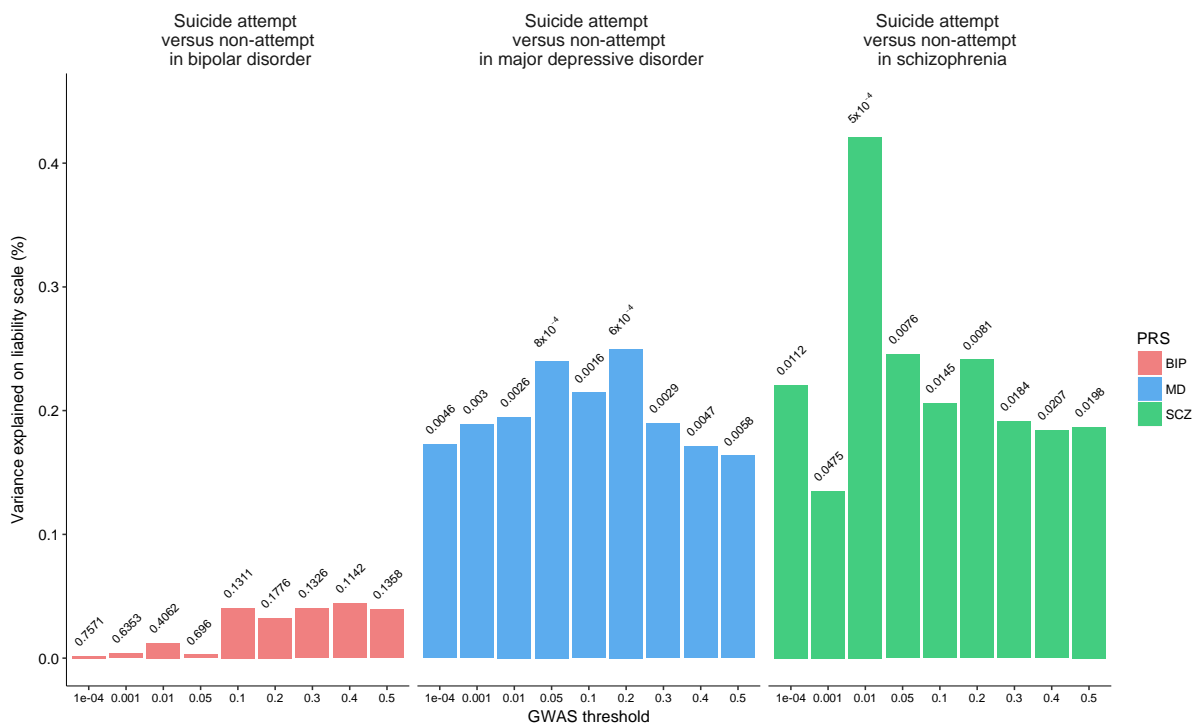

**Figure S6: Polygenic risk scores for bipolar disorder, major depression and schizophrenia tested for association with suicide attempt in the same disorder.**

PRS-polygenic risk score, BIP-bipolar disorder, MD-major depression, SCZ-schizophrenia. P values of association between polygenic scores and suicide attempt are shown above each bar.

A. Suicide attempt versus non-attempt in major depressive disorder

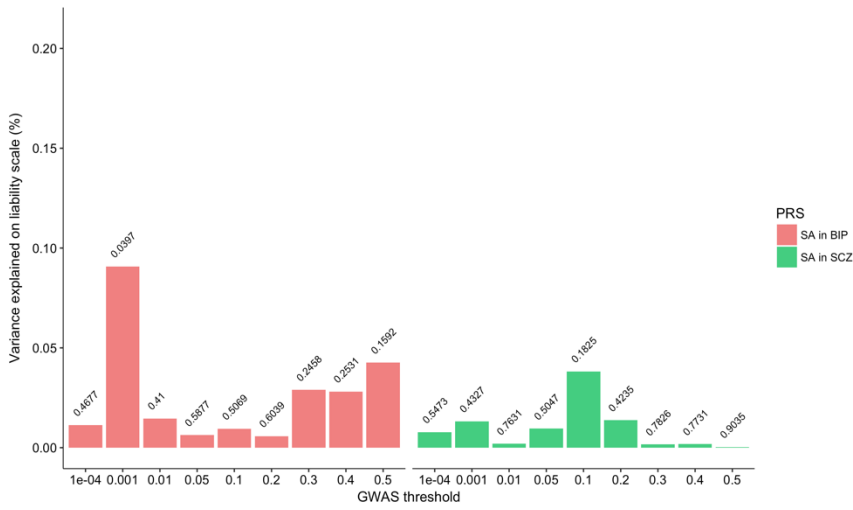

B. Suicide attempt versus non-attempt in bipolar disorder

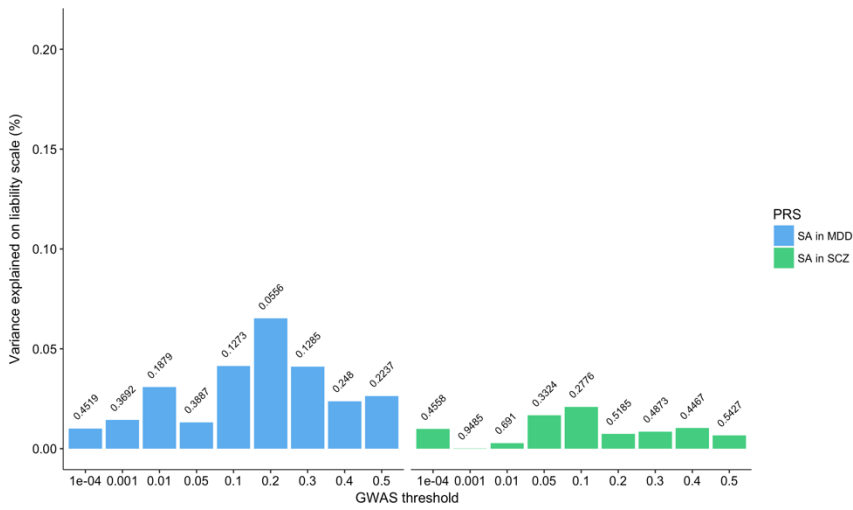

C. Suicide attempt versus non-attempt in schizophrenia

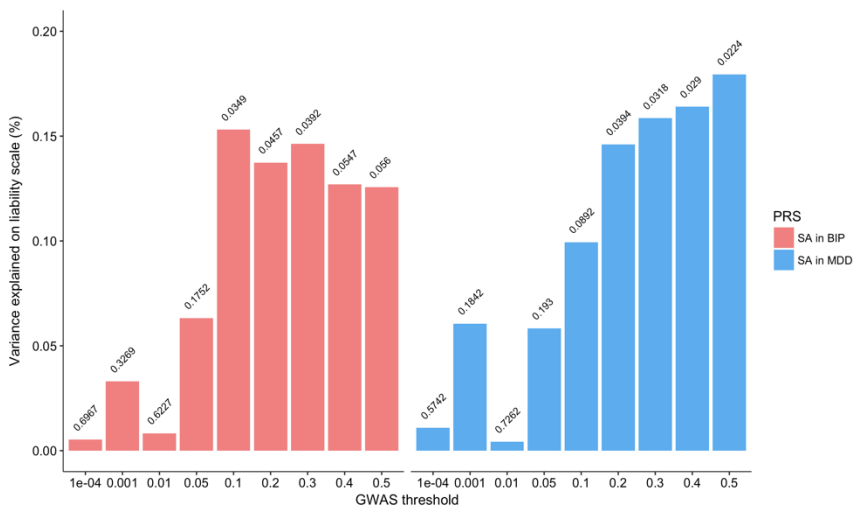

**Figure S7: Polygenic risk scores for suicide attempt tested for association with suicide attempt in A - major depressive disorder, B - bipolar disorder and C - schizophrenia.** PRS-polygenic risk score, SA-suicide attempt, MDD-major depressive disorder, BIP-bipolar disorder, SCZ-schizophrenia. P values of association between polygenic scores and suicide attempt are shown above each bar.

## Acknowledgments

We are deeply indebted to the investigators who comprise the PGC, and to the subjects who have shared their life experiences with PGC investigators. The PGC has received major funding from the US National Institute of Mental Health and the US National Institute of Drug Abuse (U01 MH109528 and U01 MH1095320). Statistical analyses were carried out on the Genetic Cluster Computer (<http://www.geneticcluster.org>) hosted by SURFsara and financially supported by the Netherlands Scientific Organization (NWO 480-05-003 PI: Posthuma) along with a supplement from the Dutch Brain Foundation and the VU University Amsterdam.

Some data used in this study were obtained from dbGaP. Funding support for the Genome-Wide Association of Schizophrenia Study was provided by the National Institute of Mental Health (R01 MH67257, R01 MH59588, R01 MH59571, R01 MH59565, R01 MH59587, R01 MH60870, R01 MH59566, R01 MH59586, R01 MH61675, R01 MH60879, R01 MH81800, U01 MH46276, U01 MH46289 U01 MH46318, U01 MH79469, and U01 MH79470) and the genotyping of samples was provided through the Genetic Association Information Network (GAIN). The datasets used for the analyses described in this manuscript were obtained from the database of Genotypes and Phenotypes (dbGaP) found at <http://www.ncbi.nlm.nih.gov/gap> through dbGaP accession number phs000021.v3.p2. Samples and associated phenotype data for the Genome-Wide Association of Schizophrenia Study were provided by the Molecular Genetics of Schizophrenia Collaboration (PI: Pablo V. Gejman, Evanston Northwestern Healthcare (ENH) and Northwestern University, Evanston, IL, USA).” Funding support for the Whole Genome Association Study of Bipolar Disorder was provided by the National Institute of Mental Health (NIMH) and the genotyping of samples was provided through the Genetic Association Information Network (GAIN). The datasets used for the analyses described in this manuscript were obtained from the database of Genotypes and Phenotypes (dbGaP) found at <http://www.ncbi.nlm.nih.gov/gap> through dbGaP accession number phs000017.v3.p1. Samples and associated phenotype data for the Collaborative Genomic Study of Bipolar Disorder were provided by the The NIMH Genetics Initiative for Bipolar Disorder. Data and biomaterials were collected in four projects that participated in NIMH Bipolar Disorder Genetics Initiative. From 1991-98, the Principal Investigators and Co-Investigators were: Indiana University, Indianapolis, IN, U01 MH46282, John Nurnberger, M.D., Ph.D., Marvin Miller, M.D., and Elizabeth Bowman, M.D.; Washington University, St. Louis, MO, U01 MH46280, Theodore Reich, M.D., Allison Goate, Ph.D., and John Rice, Ph.D.; Johns Hopkins University, Baltimore, MD U01 MH46274, J. Raymond DePaulo, Jr., M.D., Sylvia Simpson, M.D., MPH, and Colin Stine, Ph.D.; NIMH Intramural Research Program, Clinical Neurogenetics Branch, Bethesda, MD, Elliot Gershon, M.D., Diane Kazuba, B.A., and Elizabeth Maxwell, M.S.W. Data and biomaterials were collected as part of ten projects that participated in the NIMH Bipolar Disorder Genetics Initiative. From 1999-03, the Principal Investigators and Co-Investigators were: Indiana University, Indianapolis, IN, R01 MH59545, John Nurnberger, M.D., Ph.D., Marvin J. Miller, M.D., Elizabeth S. Bowman, M.D., N. Leela Rau, M.D., P. Ryan Moe, M.D., Nalini Samavedy, M.D., Rif El-Mallakh, M.D. (at University of Louisville), Hussein Manji, M.D. (at Wayne State University), Debra A. Glitz, M.D. (at Wayne State University), Eric T. Meyer, M.S., Carrie Smiley, R.N., Tatiana Foroud, Ph.D., Leah Flury, M.S., Danielle M. Dick, Ph.D., Howard Edenberg, Ph.D.; Washington University, St. Louis, MO, R01 MH059534, John Rice, Ph.D, Theodore Reich, M.D., Allison Goate, Ph.D., Laura Bierut, M.D. ; Johns Hopkins University, Baltimore, MD, R01 MH59533, Melvin McInnis M.D. , J. Raymond DePaulo, Jr., M.D., Dean F. MacKinnon, M.D., Francis M. Mondimore, M.D., James B. Potash, M.D., Peter P. Zandi, Ph.D, Dimitrios Avramopoulos, and Jennifer Payne; University of Pennsylvania, PA, R01 MH59553, Wade Berrettini M.D.,Ph.D. ; University of California at Irvine, CA, R01 MH60068, William Byerley M.D., and Mark Vawter M.D. ; University of Iowa, IA, R01 MH059548, William Coryell M.D. , and Raymond Crowe M.D. ; University of Chicago, IL, R01 MH59535, Elliot Gershon, M.D., Judith Badner Ph.D. , Francis McMahon M.D. , Chunyu Liu Ph.D., Alan Sanders M.D., Maria Caserta, Steven Dinwiddie M.D., Tu Nguyen, Donna Harakal; University of California at San Diego, CA, R01 MH59567, John Kelsoe, M.D., Rebecca McKinney, B.A.; Rush University, IL, R01 MH059556, William Scheftner M.D. , Howard M. Kravitz, D.O., M.P.H., Diana Marta, B.S., Annette Vaughn-Brown, MSN, RN, and Laurie Bederow, MA; NIMH Intramural Research Program, Bethesda, MD, 1Z01MH002810-01, Francis J. McMahon, M.D., Layla Kassem, PsyD, Sevilla Detera-Wadleigh, Ph.D, Lisa Austin,Ph.D, Dennis L. Murphy, M.D.



## Psychiatric Genomics Consortium Major Depressive Disorder Cohorts

GSK MUNICH: We thank all participants in the GSK-Munich study. We thank numerous people at GSK and Max-Planck Institute, BKH Augsburg and Klinikum Ingolstadt in Germany who contributed to this project. JANSSEN: Funded by Janssen Research & Development, LLC. We are grateful to the study volunteers for participating in the research studies and to the clinicians and support staff for enabling patient recruitment and blood sample collection. We thank the staff in the former Neuroscience Biomarkers of Janssen Research & Development for laboratory and operational support (e.g., biobanking, processing, plating, and sample de-identification), and to the staff at Illumina for genotyping Janssen DNA samples. MARS: This work was funded by the Max Planck Society, by the Max Planck Excellence Foundation, and by a grant from the German Federal Ministry for Education and Research (BMBF) in the National Genome Research Network framework (NGFN2 and NGFN-Plus, FKZ 01GS0481), and by the BMBF Program FKZ 01ES0811. We acknowledge all study participants. We thank numerous people at Max-Planck Institute, and all study sites in Germany and Switzerland who contributed to this project. Controls were from the Dortmund Health Study which was supported by the German Migraine & Headache Society, and by unrestricted grants to the University of Münster from Almirall, Astra Zeneca, Berlin Chemie, Boehringer, Boots Health Care, Glaxo-Smith-Kline, Janssen Cilag, McNeil Pharma, MSD Sharp & Dohme, and Pfizer. Blood collection was funded by the Institute of Epidemiology and Social Medicine, University of Münster. Genotyping was supported by the German Ministry of Research and Education (BMBF grant 01ER0816). PsyCoLaus: PsyCoLaus/CoLaus received additional support from research grants from GlaxoSmithKline and the Faculty of Biology and Medicine of Lausanne. QIMR: We thank the twins and their families for their willing participation in our studies. RADIANT: This report represents independent research funded by the National Institute for Health Research (NIHR) Biomedical Research Centre at South London and Maudsley NHS Foundation Trust, and King's College London. The views expressed are those of the authors and not necessarily those of the NHS, the NIHR, or the Department of Health. SHIP-LEGEND/TREND: SHIP is part of the Community Medicine Research net of the University of Greifswald which is funded by the Federal Ministry of Education and Research (grants 01ZZ9603, 01ZZ0103, and 01ZZ0403), the Ministry of Cultural Affairs, and the Social Ministry of the Federal State of Mecklenburg-West Pomerania. Genotyping in SHIP was funded by Siemens Healthineers and the Federal State of Mecklenburg-West Pomerania. Genotyping in SHIP-TREND-0 was supported by the Federal Ministry of Education and Research (grant 03ZIK012). STAR\*D: The authors appreciate the efforts of the STAR\*D investigator team for acquiring, compiling, and sharing the STAR\*D clinical data set. QIMR: We thank the twins and their families for their willing participation in our studies. MR received support from the Australian National Health and Medical Research Council (NHMRC) Centre for Research Excellence on Suicide Prevention (CRESP) [GNT1042580].

The following table lists the funding that supported the primary studies analyzed.

| Study             | Lead investigator                | Award number                                                             | Funder                                                 | Country     |
|-------------------|----------------------------------|--------------------------------------------------------------------------|--------------------------------------------------------|-------------|
| PGC               | PF Sullivan                      | U01 MH109528                                                             | NIMH                                                   | USA         |
| PGC               | A Agrawal                        | U01 MH109532                                                             | NIDA                                                   | USA         |
| PGC               | D Posthuma                       | 480-05-003                                                               | Netherlands Scientific Organization                    | Netherlands |
| PGC               | D Posthuma                       | –                                                                        | Dutch Brain Foundation and the VU University Amsterdam | Netherlands |
| PsyColaus         | M Preisig                        | 3200B0–105993, 3200B0-118308, 33CSO-122661, 33CS30-139468, 33CS30-148401 | Swiss National Science Foundation                      | Switzerland |
| QIMR              | NG Martin                        | 941177, 971232, 3399450 and 443011                                       | National Health and Medical Research Council           | Australia   |
| QIMR              | AC Heath                         | AA07535, AA07728, and AA10249                                            | NIAAA                                                  | USA         |
| RADIANT           | C Lewis, G Breen                 | G0701420                                                                 | MRC                                                    | UK          |
| RADIANT           | G Breen                          | G0901245                                                                 | MRC                                                    | UK          |
| RADIANT           | G Breen                          | U01 MH109528                                                             | NIMH                                                   | UK          |
| BoMa              | M Rietschel                      | RI 908/11-1                                                              | Deutsche Forschungsgemeinschaft                        | Germany     |
| BoMa              | MM Nöthen                        | NO246/10-1                                                               | Deutsche Forschungsgemeinschaft                        | Germany     |
| BoMa              | MM Nöthen                        | Excellence Cluster ImmunoSensation                                       | Deutsche Forschungsgemeinschaft                        | Germany     |
| BoMa              | MM Nöthen, M Rietschel, S Cichon | 01ZX1314A/01ZX1614A, 01ZX1314G/01ZX1614G,                                | BMBF Integument                                        | Germany     |
| BoMa              | MM Nöthen, M Rietschel, S Cichon | 01GS08144, 01GS08147                                                     | BMBF NGFNplus MoodS                                    | Germany     |
| CoFaMS - Adelaide | BT Baune                         | APP1060524                                                               | NHMRC                                                  | Australia   |
| NESDA             | BWJH Penninx                     | ZonMW Geestkracht grant                                                  | N.W.O.                                                 | Netherlands |
| NTR               | DI Boomsma                       | 480-15-001/674                                                           | N.W.O.                                                 | Netherlands |
| SHIP-LEGEND/TREND | HJ Grabe                         | DFG: GR 1912/5-1                                                         | German Research Foundation                             | Germany     |
| STAR*D            | SP Hamilton                      | R01 MH-072802                                                            | NIMH                                                   | USA         |

#### Psychiatric Genomics Consortium Bipolar Disorder Cohorts

**BACCS:** This work was supported in part by the NIHR Maudsley Biomedical Research Centre ('BRC') hosted at King's College London and South London and Maudsley NHS Foundation Trust, and funded by the National Institute for Health Research under its Biomedical Research Centres funding initiative. The views expressed are those of the authors and not necessarily those of the BRC, the NHS, the NIHR or the Department of Health or King's College London. We gratefully acknowledge capital equipment funding from the Maudsley Charity (Grant Reference 980) and Guy's and St Thomas's Charity (Grant Reference STR130505).

**BOMA-Germany I, BOMA-Germany II, BOMA-Germany III, PsyCourse:** This work was supported by the German Ministry for Education and Research (BMBF) through the Integrated Network IntegraMent (Integrated Understanding of Causes and Mechanisms in Mental Disorders), under the auspices of the e:Med program (grant 01ZX1314A/01ZX1614A to MMN and SC, grant 01ZX1314G/01ZX1614G to MR, grant 01ZX1314K to TGS). This work was supported by the German Ministry for Education and Research (BMBF) grants NGFNplus MoodS (Systematic Investigation of the Molecular Causes of Major Mood Disorders and Schizophrenia; grant 01GS08144 to MMN and SC, grant 01GS08147 to MR). This work was also supported by the Deutsche Forschungsgemeinschaft (DFG), grant NO246/10-1 to MMN (FOR 2107), grant RI 908/11-1 to MR (FOR 2107), grant WI 3429/3-1 to SHW, grants SCHU 1603/4-1, SCHU 1603/5-1 (KFO 241) and SCHU 1603/7-1 (PsyCourse) to TGS. This work was supported by the Swiss National Science Foundation (SNSF, grant 156791 to SC). MMN is supported through the Excellence Cluster ImmunoSensation. TGS is supported by an unrestricted grant from the Dr. Lisa-Oehler Foundation. MH was supported by the Deutsche Forschungsgemeinschaft.

France: This research was supported by Foundation FondaMental, Créteil, France and by the Investissements d’Avenir Programs managed by the ANR under references ANR-11-IDEX-0004-02 and ANR-10-COHO-10-01.  
Halifax: Halifax data were obtained with support from the Canadian Institutes of Health Research.

Michigan (NIMH/Pritzker Neuropsychiatric Disorders Research Consortium): We thank the participants who donated their time and DNA to make this study possible. We thank members of the NIMH Human Genetics Initiative and the University of Michigan Prechter Bipolar DNA Repository for generously providing phenotype data and DNA samples. Many of the authors are members of the Pritzker Neuropsychiatric Disorders Research Consortium which is supported by the Pritzker Neuropsychiatric Disorders Research Fund L.L.C. A shared intellectual property agreement exists between this philanthropic fund and the University of Michigan, Stanford University, the Weill Medical College of Cornell University, HudsonAlpha Institute of Biotechnology, the Universities of California at Davis, and at Irvine, to encourage the development of appropriate findings for research and clinical applications.

TOP: TE was funded by The South-East Norway Regional Health Authority (#2015-078) and a research grant from Mrs. Throne-Holst.

The following table lists the funding that supported the primary studies analyzed.

| <b>Study</b>                        | <b>Lead investigator</b> | <b>Country, Funder, Award number</b>                                                                                                                                                                                                                                                                   |
|-------------------------------------|--------------------------|--------------------------------------------------------------------------------------------------------------------------------------------------------------------------------------------------------------------------------------------------------------------------------------------------------|
| PGC                                 | P Sullivan               | USA, NIMH MH109528                                                                                                                                                                                                                                                                                     |
| PGC                                 | D Posthuma               | Netherlands, Scientific Organization Netherlands, 480-05-003                                                                                                                                                                                                                                           |
| PGC                                 | D Posthuma               | Dutch Brain Foundation and the VU University Amsterdam Netherlands                                                                                                                                                                                                                                     |
| BiGS, Uchicago                      | ES Gershon               | R01 MH103368                                                                                                                                                                                                                                                                                           |
| BiGS, GAIN                          | FJ McMahon               | US, NIMH, R01 MH061613, ZIA MH002843                                                                                                                                                                                                                                                                   |
| BiGS, UCSD                          | J Kelsoe                 | US, NIMH, MH078151, MH081804, MH59567                                                                                                                                                                                                                                                                  |
| BiGS, University of Pittsburgh      | V Nimgaonkar             | US, NIMH MH63480                                                                                                                                                                                                                                                                                       |
| BACCS                               | G Breen                  | GB, JRIC, HG, CL were supported in part by the NIHR Maudsley Biomedical Research Centre ('BRC') hosted at King's College London and South London and Maudsley NHS Foundation Trust, and funded by the National Institute for Health Research under its Biomedical Research Centres funding initiative. |
| BOMA-Romania                        | M Grigoriou-Serbanescu   | Romania, UEFISCDI, Grant no. 89/2012                                                                                                                                                                                                                                                                   |
| BOMA-Germany I, II, III             | S Cichon                 | Germany, BMBF Integument, 01ZX1314A/01ZX1614A                                                                                                                                                                                                                                                          |
| BOMA-Germany I, II, III             | S Cichon                 | Germany, BMBF NGFNplus MoodS, 01GS08144                                                                                                                                                                                                                                                                |
| BOMA-Germany I, II, III             | S Cichon                 | Switzerland, SNSF, 156791                                                                                                                                                                                                                                                                              |
| BOMA-Germany I, II, III             | MM Nöthen                | Germany, BMBF Integument, 01ZX1314A/01ZX1614A                                                                                                                                                                                                                                                          |
| BOMA-Germany I, II, III             | MM Nöthen                | Germany, BMBF NGFNplus MoodS, 01GS08144                                                                                                                                                                                                                                                                |
| BOMA-Germany I, II, III             | MM Nöthen                | Germany, Deutsche Forschungsgemeinschaft, Excellence Cluster ImmunoSensation                                                                                                                                                                                                                           |
| BOMA-Germany I, II, III             | MM Nöthen                | Germany, Deutsche Forschungsgemeinschaft, NO246/10-1                                                                                                                                                                                                                                                   |
| BOMA-Germany I, II, III             | SH Witt                  | Germany, Deutsche Forschungsgemeinschaft, WI 3429/3-1                                                                                                                                                                                                                                                  |
| BOMA-Germany I, II, III, BOMA-Spain | M Rietschel              | Germany, BMBF Integument, 01ZX1314G/01ZX1614G                                                                                                                                                                                                                                                          |
| BOMA-Germany I, II, III, BOMA-Spain | M Rietschel              | Germany, BMBF NGFNplus MoodS, 01GS08147                                                                                                                                                                                                                                                                |

|                                          |                      |                                                                                                                                                                                                                                                                                                                                                                                                                                |
|------------------------------------------|----------------------|--------------------------------------------------------------------------------------------------------------------------------------------------------------------------------------------------------------------------------------------------------------------------------------------------------------------------------------------------------------------------------------------------------------------------------|
| BOMA-Germany I, II, III, BOMA-Spain      | M Rietschel          | Germany, Deutsche Forschungsgemeinschaft, RI 908/11-1                                                                                                                                                                                                                                                                                                                                                                          |
| BOMA-Germany I, II, III, PsyCourse, BiGS | TG Schulze           | Germany, BMBF Integument, 01ZX1314K                                                                                                                                                                                                                                                                                                                                                                                            |
| BOMA-Germany I, II, III, PsyCourse, BiGS | TG Schulze           | Germany, DFG, SCHU 1603/4-1, SCHU 1603/5-1, SCHU 1603/7-1                                                                                                                                                                                                                                                                                                                                                                      |
| BOMA-Germany I, II, III, PsyCourse, BiGS | TG Schulze           | Germany, Dr. Lisa-Oehler Foundation (Kassel, Germany)                                                                                                                                                                                                                                                                                                                                                                          |
| Fran                                     | M Leboyer            | France, Inserm, ANR                                                                                                                                                                                                                                                                                                                                                                                                            |
| Halifax                                  | M Alda               | CIHR grant #64410                                                                                                                                                                                                                                                                                                                                                                                                              |
| Norway                                   | I Agartz             | Sweden, Swedish Research Council                                                                                                                                                                                                                                                                                                                                                                                               |
| Norway                                   | OA Andreassen        | Norway, Research Council of Norway (#217776, #223273, #248778, #249711), KG Jebsen Stiftelsen, The South-East Norway Regional Health Authority (#2012-132, #2012-131, #2017-004)                                                                                                                                                                                                                                               |
| Norway                                   | T Elvsåshagen        | Norway, The South-East Norway Regional Health Authority (#2015-078) and a research grant from Mrs. Throne-Holst.                                                                                                                                                                                                                                                                                                               |
| Norway                                   | I Melle              | Norway, Research Council of Norway (#421716, #223273), KG Jebsen Stiftelsen, The South-East Norway Regional Health Authority (#2011085, #2013088, #2014102)                                                                                                                                                                                                                                                                    |
| Norway                                   | KJ Oedegaard         | Norway, the Western Norway Regional Health Authority                                                                                                                                                                                                                                                                                                                                                                           |
| Norway                                   | OB Smeland           | Norway, The South-East Norway Regional Health Authority (#2016-064, #2017-004)                                                                                                                                                                                                                                                                                                                                                 |
| UCL                                      | A McQuillin          | Medical Research Council (MRC) - G1000708                                                                                                                                                                                                                                                                                                                                                                                      |
| WTCCC                                    | N Craddock; AH Young | Wellcome Trust. For the 1958 Birth Cohort, venous blood collection was funded by the UK Medical Research Council. AHY was funded by NIMH (USA); CIHR (Canada); NARSAD (USA); Stanley Medical Research Institute (USA); MRC (UK); Wellcome Trust (UK); Royal College of Physicians (Edin); BMA (UK); UBC-VGH Foundation (Canada); WEDC (Canada); CCS Depression Research Fund (Canada); MSFHR (Canada); NIHR (UK); Janssen (UK) |

## Psychiatric Genomics Consortium Schizophrenia cohorts

Portugal: CNP and MTP are or have been supported by grants from the NIMH (MH085548, MH085542, MH071681, MH061884, MH58693, and MH52618) and the NCR (RR026075). CNP, MTP, and AHF are or have been supported by grants from the Department of Veterans Affairs Merit Review Program

Bulgarian Trio sample: Work in Cardiff was supported by MRC Centre (G0800509) and MRC Programme (G0801418) Grants, the European Community's Seventh Framework Programme (HEALTH-F2-2010-241909 (Project EU-GEI)), the European Union Seventh Framework Programme (FP7/2007-2013) under grant agreement n° 279227, a fellowship to JW from the MRC/Welsh Assembly Government and the Margaret Temple Award from the British Medical Association. The recruitment of families in Bulgaria was funded by the Janssen Research Foundation, Beerse, Belgium. We are grateful to the study volunteers for participating in the Janssen research studies and to the clinicians and support staff for enabling patient recruitment and blood sample collection. Informed consent was obtained from all participants or their parents or guardians. We thank the staff in the Neuroscience Biomarkers Genomic Lab led by Reyna Favis at Janssen for sample processing and the staff at Illumina for genotyping Janssen DNA samples. We also thank Anthony Santos, Nicole Bottrel, Monique-Andree Franc, William Cafferty of Janssen Research & Development) for operational support.

Dutch sample: High-Density Genome-Wide Association Study Of Schizophrenia In Large Dutch Sample (R01 MH078075 NIH/National Institute Of Mental Health PI: Roel A. Ophoff).

Denmark: The Danish Aarhus study was supported by grants from The Lundbeck Foundation, The Danish Strategic Research Council, Aarhus University, and The Stanley Research Foundation.

TOP: The TOP Study was supported by the Research Council of Norway (#213837, # 217776, # 223273), South-East Norway Health Authority (# 2013-123) and K.G. Jepsen Foundation.

Bonn/Mannheim: The Bonn/Mannheim sample was genotyped within a study that was supported by the German Federal Ministry of Education and Research (BMBF) through the Integrated Genome Research Network (IG) MoodS (Systematic Investigation of the Molecular Causes of Major Mood Disorders and Schizophrenia; grant 01GS08144 to M.M.N. and S.C., grant 01GS08147 to M.R.), under the auspices of the National Genome Research Network plus (NGFNplus), and through the Integrated Network IntegraMent (Integrated Understanding of Causes and Mechanisms in Mental Disorders), under the auspices of the e:Med Programme (GSK control sample; Müller-Myhsok). This work has been funded by the Bavarian Ministry of Commerce and by the Federal Ministry of Education and Research in the framework of the National Genome Research Network, Förderkennzeichen 01GS0481 and the Bavarian Ministry of Commerce. M.M.N. is a member of the DFG-funded Excellence-Cluster ImmunoSensation. M.M.N. also received support from the Alfried Krupp von Bohlen und Halbach-Stiftung.

Molecular Genetics of Schizophrenia: The collection was established as part of the Wellcome Trust Case- Control Consortium. We thank the study participants, and the research staff at the study sites. This study was supported by NIMH grant R01MH062276 (to DF Levinson, C Laurent, M Owen and D Wildenauer), grant R01MH068922 (to PV Gejman), grant R01MH068921 (to AE Pulver) and grant R01MH068881 (to B Riley). The authors are grateful to the many family members who participated in the studies that recruited these samples, to the many clinicians who assisted in their recruitment. In addition to the support acknowledged for the Multicenter Genetics Studies of Schizophrenia and Molecular Genetics of Schizophrenia studies, Dr. DF Levinson received additional support from the Walter E. Nichols, M.D., Professorship in the School of Medicine, the Eleanor Nichols Endowment, the Walter F. & Rachael L. Nichols Endowment and the William and Mary McIvor Endowment, Stanford University. This study was supported by NIH R01 grants (MH67257 to N.G.B., MH59588 to B.J.M., MH59571 to P.V.G., MH59565 to R.F., MH59587 to F.A., MH60870 to W.F.B., MH59566 to D.W.B., MH59586 to J.M.S., MH61675 to D.F.L., MH60879 to C.R.C., and MH81800 to P.V.G.), NIH U01 grants (MH46276 to C.R.C., MH46289 to C. Kaufmann, MH46318 to M.T. Tsuang, MH79469 to P.V.G., and MH79470 to D.F.L.), the Genetic Association Information Network (GAIN), and by The Paul Michael Donovan Charitable Foundation. Genotyping was carried out by the Center for Genotyping and Analysis at the Broad Institute of Harvard and MIT (S. Gabriel and D. B. Mirel), which is supported by grant U54 RR020278 from the National Center for Research Resources.

## Replication cohorts

### UK Biobank

This research has been conducted using the UK Biobank Resource (<http://www.ukbiobank.ac.uk/>), as an approved extension to application 16577 (Dr Breen). High performance computing facilities used were funded with capital equipment grants from the GSTT Charity (TR130505) and Maudsley Charity (980).

### iPSYCH

The iPSYCH team acknowledges funding from the Lundbeck Foundation (grants R102-A9118 and R155-2014-1724), the Stanley Medical Research Institute, the European Research Council (project 294838), the Novo Nordisk Foundation for supporting the Danish National Biobank resource, and Aarhus and Copenhagen Universities and University Hospitals, including support to the iSEQ Center, the GenomeDK HPC facility, and the CIRRAU Center.

## Consortium Authorship

### Major Depressive Disorder Working Group of the Psychiatric Genomics Consortium

Naomi R Wray\* 1, 2  
Stephan Ripke\* 3, 4, 5  
Manuel Mattheisen\* 6, 7, 8, 9  
Maciej Trzaskowski\* 1  
Enda M Byrne 1  
Abdel Abdellaoui 10  
Mark J Adams 11  
Esben Agerbo 9, 12, 13  
Tracy M Air 14  
Till F M Andlauer 15, 16  
Silviu-Alin Bacanu 17  
Marie Bækvad-Hansen 9, 18  
Aartjan T F Beekman 19  
Tim B Bigdeli 17, 20  
Elisabeth B Binder 15, 21  
Douglas H R Blackwood 11  
Julien Bryois 22  
Henriette N Buttenschøn 8, 9, 23  
Jonas Bybjerg-Grauholm 9, 18  
Na Cai 24, 25  
Enrique Castelao 26  
Jane Hvarregaard Christensen 7, 8, 9  
Toni-Kim Clarke 11  
Jonathan R I Coleman 27  
Lucía Colodro-Conde 28  
Baptiste Couvy-Duchesne 2, 29  
Nick Craddock 30  
Gregory E Crawford 31, 32  
Gail Davies 33  
Ian J Deary 33  
Franziska Degenhardt 34, 35  
Eske M Derks 28  
Nese Direk 36, 37  
Conor V Dolan 10  
Erin C Dunn 38, 39, 40  
Thalia C Eley 27  
Valentina Escott-Price 41  
Farnush Farhadi Hassan Kiadeh 42  
Hilary K Finucane 43, 44  
Jerome C Foo 45  
Andreas J Forstner 34, 35, 46, 47  
Josef Frank 45  
Hélène A Gaspar 27  
Michael Gill 48  
Fernando S Goes 49  
Scott D Gordon 28  
Jakob Grove 7, 8, 9, 50  
Lynsey S Hall 11, 51  
Christine Søholm Hansen 9, 18  
Thomas F Hansen 52, 53, 54  
Stefan Herms 34, 35, 47  
Ian B Hickie 55  
Per Hoffmann 34, 35, 47  
Georg Homuth 56  
Carsten Horn 57  
Jouke-Jan Hottenga 10  
David M Hougaard 9, 18  
David M Howard 11  
Marcus Ising 58  
Rick Jansen 19  
Ian Jones 59  
Lisa A Jones 60  
Eric Jorgenson 61  
James A Knowles 62  
Isaac S Kohane 63, 64, 65  
Julia Kraft 4  
Warren W. Kretschmar 66  
Jesper Krogh 67  
Zoltán Kutalik 68, 69  
Yihan Li 66  
Penelope A Lind 28  
Donald J MacIntyre 70, 71  
Dean F MacKinnon 49  
Robert M Maier 2  
Wolfgang Maier 72  
Jonathan Marchini 73  
Hamdi Mbarek 10  
Patrick McGrath 74  
Peter McGuffin 27  
Sarah E Medland 28  
Divya Mehta 2, 75  
Christel M Middeldorp 10, 76, 77  
Evelin Mihailov 78  
Yuri Milaneschi 19  
Lili Milani 78  
Francis M Mondimore 49  
Grant W Montgomery 1  
Sara Mostafavi 79, 80  
Niamh Mullins 27  
Matthias Nauck 81, 82  
Bernard Ng 80  
Michel G Nivard 10  
Dale R Nyholt 83  
Paul F O'Reilly 27  
Hogni Oskarsson 84  
Michael J Owen 59  
Jodie N Painter 28  
Carsten Bøcker Pedersen 9, 12, 13  
Marianne Giørtz Pedersen 9, 12, 13  
Roseann E. Peterson 17, 85  
Erik Pettersson 22  
Wouter J Peyrot 19  
Giorgio Pistis 26  
Danielle Posthuma 86, 87  
Jorge A Quiroz 88  
Per Qvist 7, 8, 9  
John P Rice 89  
Brien P. Riley 17  
Margarita Rivera 27, 90  
Saira Saeed Mirza 36  
Robert Schoevers 91  
Eva C Schulte 92, 93  
Ling Shen 61  
Jianxin Shi 94  
Stanley I Shyn 95  
Engilbert Sigurdsson 96  
Grant C B Sinnamon 97  
Johannes H Smit 19  
Daniel J Smith 98  
Hreinn Stefansson 99  
Stacy Steinberg 99  
Fabian Streit 45  
Jana Strohmaier 45  
Katherine E Tansey 100  
Henning Teismann 101  
Alexander Teumer 102  
Wesley Thompson 9, 53, 103, 104  
Pippa A Thomson 105  
Thorgeir E Thorgeirsson 99  
Matthew Traylor 106  
Jens Treutlein 45  
Vassily Trubetskoy 4  
André G Uitterlinden 107  
Daniel Umbricht 108  
Sandra Van der Auwera 109  
Albert M van Hemert 110  
Alexander Viktorin 22  
Peter M Visscher 1, 2  
Yunpeng Wang 9, 53, 104  
Bradley T. Webb 111  
Shantel Marie Weinsheimer 9, 53  
Jürgen Wellmann 101  
Gonneke Willemsen 10  
Stephanie H Witt 45  
Yang Wu 1  
Hualin S Xi 112  
Jian Yang 2, 113  
Futao Zhang 1  
Volker Arolt 114  
Bernhard T Baune 115  
Klaus Berger 101  
Dorret I Boomsma 10  
Sven Cichon 34, 47, 116, 117



Udo Dannlowski 114  
EJC de Geus 10, 118  
J Raymond DePaulo 49  
Enrico Domenici 119  
Katharina Domschke 120  
Tõnu Esko 5, 78  
Hans J Grabe 109  
Steven P Hamilton 121  
Caroline Hayward 122  
Andrew C Heath 89  
Kenneth S Kendler 17  
Stefan Kloiber 58, 123, 124  
Glyn Lewis 125  
Qingqin S Li 126  
Susanne Lucae 58  
Pamela AF Madden 89  
Patrik K Magnusson 22  
Nicholas G Martin 28  
Andrew M McIntosh 11, 33  
Andres Metspalu 78, 127  
Ole Mors 9, 128  
Preben Bo Mortensen 8, 9, 12, 13  
Bertram Müller-Myhsok 15, 16,  
129  
Merete Nordentoft 9, 130  
Markus M Nöthen 34, 35  
Michael C O'Donovan 59  
Sara A Paciga 131  
Nancy L Pedersen 22  
Brenda WJH Penninx 19  
Roy H Perlis 38, 132  
David J Porteous 105  
James B Potash 133  
Martin Preisig 26  
Marcella Rietschel 45  
Catherine Schaefer 61  
Thomas G Schulze 45, 93, 134,  
135, 136  
Jordan W Smoller 38, 39, 40  
Kari Stefansson 99, 137  
Henning Tiemeier 36, 138, 139  
Rudolf Uher 140  
Henry Völzke 102  
Myrna M Weissman 74, 141  
Thomas Werge 9, 53, 142  
Cathryn M Lewis 27, 143  
Douglas F Levinson 144  
Gerome Breen 27, 145  
Anders D Børglum 7, 8, 9  
Patrick F Sullivan 22, 146, 147

- 1, Institute for Molecular Bioscience, The University of Queensland, Brisbane, QLD, AU
- 2, Queensland Brain Institute, The University of Queensland, Brisbane, QLD, AU
- 3, Analytic and Translational Genetics Unit, Massachusetts General Hospital, Boston, MA, US
- 4, Department of Psychiatry and Psychotherapy, Universitätsmedizin Berlin Campus Charité Mitte, Berlin, DE
- 5, Medical and Population Genetics, Broad Institute, Cambridge, MA, US
- 6, Centre for Psychiatry Research, Department of Clinical Neuroscience, Karolinska Institutet, Stockholm, SE
- 7, Department of Biomedicine, Aarhus University, Aarhus, DK
- 8, iSEQ, Centre for Integrative Sequencing, Aarhus University, Aarhus, DK
- 9, iPSYCH, The Lundbeck Foundation Initiative for Integrative Psychiatric Research, DK
- 10, Dept of Biological Psychology & EMGO+ Institute for Health and Care Research, Vrije Universiteit Amsterdam, Amsterdam, NL
- 11, Division of Psychiatry, University of Edinburgh, Edinburgh, GB
- 12, Centre for Integrated Register-based Research, Aarhus University, Aarhus, DK
- 13, National Centre for Register-Based Research, Aarhus University, Aarhus, DK
- 14, Discipline of Psychiatry, University of Adelaide, Adelaide, SA, AU
- 15, Department of Translational Research in Psychiatry, Max Planck Institute of Psychiatry, Munich, DE
- 16, Munich Cluster for Systems Neurology (SyNergy), Munich, DE
- 17, Department of Psychiatry, Virginia Commonwealth University, Richmond, VA, US
- 18, Center for Neonatal Screening, Department for Congenital Disorders, Statens Serum Institut, Copenhagen, DK
- 19, Department of Psychiatry, Vrije Universiteit Medical Center and GGZ inGeest, Amsterdam, NL
- 20, Virginia Institute for Psychiatric and Behavior Genetics, Richmond, VA, US
- 21, Department of Psychiatry and Behavioral Sciences, Emory University School of Medicine, Atlanta, GA, US
- 22, Department of Medical Epidemiology and Biostatistics, Karolinska Institutet, Stockholm, SE
- 23, Department of Clinical Medicine, Translational Neuropsychiatry Unit, Aarhus University, Aarhus, DK
- 24, Human Genetics, Wellcome Trust Sanger Institute, Cambridge, GB
- 25, Statistical genomics and systems genetics, European Bioinformatics Institute (EMBL-EBI), Cambridge, GB
- 26, Department of Psychiatry, University Hospital of Lausanne, Prilly, Vaud, CH
- 27, Social Genetic and Developmental Psychiatry Centre, King's College London, London, GB
- 28, Genetics and Computational Biology, QIMR Berghofer Medical Research Institute, Brisbane, QLD, AU
- 29, Centre for Advanced Imaging, The University of Queensland, Brisbane, QLD, AU
- 30, Psychological Medicine, Cardiff University, Cardiff, GB
- 31, Center for Genomic and Computational Biology, Duke University, Durham, NC, US
- 32, Department of Pediatrics, Division of Medical Genetics, Duke University, Durham, NC, US
- 33, Centre for Cognitive Ageing and Cognitive Epidemiology, University of Edinburgh, Edinburgh, GB
- 34, Institute of Human Genetics, University of Bonn, Bonn, DE
- 35, Life&Brain Center, Department of Genomics, University of Bonn, Bonn, DE
- 36, Epidemiology, Erasmus MC, Rotterdam, Zuid-Holland, NL
- 37, Psychiatry, Dokuz Eylul University School Of Medicine, Izmir, TR
- 38, Department of Psychiatry, Massachusetts General Hospital, Boston, MA, US
- 39, Psychiatric and Neurodevelopmental Genetics Unit (PNGU), Massachusetts General Hospital, Boston, MA, US
- 40, Stanley Center for Psychiatric Research, Broad Institute, Cambridge, MA, US
- 41, Neuroscience and Mental Health, Cardiff University, Cardiff, GB
- 42, Bioinformatics, University of British Columbia, Vancouver, BC, CA
- 43, Department of Epidemiology, Harvard T.H. Chan School of Public Health, Boston, MA, US
- 44, Department of Mathematics, Massachusetts Institute of Technology, Cambridge, MA, US
- 45, Department of Genetic Epidemiology in Psychiatry, Central Institute of Mental Health, Medical Faculty Mannheim, Heidelberg University, Mannheim, Baden-Württemberg, DE
- 46, Department of Psychiatry (UPK), University of Basel, Basel, CH
- 47, Human Genomics Research Group, Department of Biomedicine, University of Basel, Basel, CH
- 48, Department of Psychiatry, Trinity College Dublin, Dublin, IE
- 49, Psychiatry & Behavioral Sciences, Johns Hopkins University, Baltimore, MD, US
- 50, Bioinformatics Research Centre, Aarhus University, Aarhus, DK
- 51, Institute of Genetic Medicine, Newcastle University, Newcastle upon Tyne, GB
- 52, Danish Headache Centre, Department of Neurology, Rigshospitalet, Glostrup, DK

53, Institute of Biological Psychiatry, Mental Health Center Sct. Hans, Mental Health Services Capital Region of Denmark, Copenhagen, DK  
54, iPSYCH, The Lundbeck Foundation Initiative for Psychiatric Research, Copenhagen, DK  
55, Brain and Mind Centre, University of Sydney, Sydney, NSW, AU  
56, Interfaculty Institute for Genetics and Functional Genomics, Department of Functional Genomics, University Medicine and Ernst Moritz Arndt University Greifswald, Greifswald, Mecklenburg-Vorpommern, DE  
57, Roche Pharmaceutical Research and Early Development, Pharmaceutical Sciences, Roche Innovation Center Basel, F. Hoffmann-La Roche Ltd, Basel, CH  
58, Max Planck Institute of Psychiatry, Munich, DE  
59, MRC Centre for Neuropsychiatric Genetics and Genomics, Cardiff University, Cardiff, GB  
60, Department of Psychological Medicine, University of Worcester, Worcester, GB  
61, Division of Research, Kaiser Permanente Northern California, Oakland, CA, US  
62, Psychiatry & The Behavioral Sciences, University of Southern California, Los Angeles, CA, US  
63, Department of Biomedical Informatics, Harvard Medical School, Boston, MA, US  
64, Department of Medicine, Brigham and Women's Hospital, Boston, MA, US  
65, Informatics Program, Boston Children's Hospital, Boston, MA, US  
66, Wellcome Trust Centre for Human Genetics, University of Oxford, Oxford, GB  
67, Department of Endocrinology at Herlev University Hospital, University of Copenhagen, Copenhagen, DK  
68, Institute of Social and Preventive Medicine (IUMSP), University Hospital of Lausanne, Lausanne, VD, CH  
69, Swiss Institute of Bioinformatics, Lausanne, VD, CH  
70, Division of Psychiatry, Centre for Clinical Brain Sciences, University of Edinburgh, Edinburgh, GB  
71, Mental Health, NHS 24, Glasgow, GB  
72, Department of Psychiatry and Psychotherapy, University of Bonn, Bonn, DE  
73, Statistics, University of Oxford, Oxford, GB  
74, Psychiatry, Columbia University College of Physicians and Surgeons, New York, NY, US  
75, School of Psychology and Counseling, Queensland University of Technology, Brisbane, QLD, AU  
76, Child and Youth Mental Health Service, Children's Health Queensland Hospital and Health Service, South Brisbane, QLD, AU  
77, Child Health Research Centre, University of Queensland, Brisbane, QLD, AU  
78, Estonian Genome Center, University of Tartu, Tartu, EE  
79, Medical Genetics, University of British Columbia, Vancouver, BC, CA  
80, Statistics, University of British Columbia, Vancouver, BC, CA  
81, DZHK (German Centre for Cardiovascular Research), Partner Site Greifswald, University Medicine, University Medicine Greifswald, Greifswald, Mecklenburg-Vorpommern, DE  
82, Institute of Clinical Chemistry and Laboratory Medicine, University Medicine Greifswald, Greifswald, Mecklenburg-Vorpommern, DE  
83, Institute of Health and Biomedical Innovation, Queensland University of Technology, Brisbane, QLD, AU  
84, Humus, Reykjavik, IS  
85, Virginia Institute for Psychiatric & Behavioral Genetics, Virginia Commonwealth University, Richmond, VA, US  
86, Clinical Genetics, Vrije Universiteit Medical Center, Amsterdam, NL  
87, Complex Trait Genetics, Vrije Universiteit Amsterdam, Amsterdam, NL  
88, Solid Biosciences, Boston, MA, US  
89, Department of Psychiatry, Washington University in Saint Louis School of Medicine, Saint Louis, MO, US  
90, Department of Biochemistry and Molecular Biology II, Institute of Neurosciences, Center for Biomedical Research, University of Granada, Granada, ES  
91, Department of Psychiatry, University of Groningen, University Medical Center Groningen, Groningen, NL  
92, Department of Psychiatry and Psychotherapy, Medical Center of the University of Munich, Campus Innenstadt, Munich, DE  
93, Institute of Psychiatric Phenomics and Genomics (IPPG), Medical Center of the University of Munich, Campus Innenstadt, Munich, DE  
94, Division of Cancer Epidemiology and Genetics, National Cancer Institute, Bethesda, MD, US  
95, Behavioral Health Services, Kaiser Permanente Washington, Seattle, WA, US  
96, Faculty of Medicine, Department of Psychiatry, University of Iceland, Reykjavik, IS  
97, School of Medicine and Dentistry, James Cook University, Townsville, QLD, AU  
98, Institute of Health and Wellbeing, University of Glasgow, Glasgow, GB  
99, deCODE Genetics / Amgen, Reykjavik, IS

100, College of Biomedical and Life Sciences, Cardiff University, Cardiff, GB  
101, Institute of Epidemiology and Social Medicine, University of Münster, Münster, Nordrhein-Westfalen, DE  
102, Institute for Community Medicine, University Medicine Greifswald, Greifswald, Mecklenburg-Vorpommern, DE  
103, Department of Psychiatry, University of California, San Diego, San Diego, CA, US  
104, KG Jebsen Centre for Psychosis Research, Norway Division of Mental Health and Addiction, Oslo University Hospital, Oslo, NO  
105, Medical Genetics Section, CGEM, IGMM, University of Edinburgh, Edinburgh, GB  
106, Clinical Neurosciences, University of Cambridge, Cambridge, GB  
107, Internal Medicine, Erasmus MC, Rotterdam, Zuid-Holland, NL  
108, Roche Pharmaceutical Research and Early Development, Neuroscience, Ophthalmology and Rare Diseases Discovery & Translational Medicine Area, Roche Innovation Center Basel, F. Hoffmann-La Roche Ltd, Basel, CH  
109, Department of Psychiatry and Psychotherapy, University Medicine Greifswald, Greifswald, Mecklenburg-Vorpommern, DE  
110, Department of Psychiatry, Leiden University Medical Center, Leiden, NL  
111, Virginia Institute for Psychiatric & Behavioral Genetics, Virginia Commonwealth University, Richmond, VA, US  
112, Computational Sciences Center of Emphasis, Pfizer Global Research and Development, Cambridge, MA, US  
113, Institute for Molecular Bioscience; Queensland Brain Institute, The University of Queensland, Brisbane, QLD, AU  
114, Department of Psychiatry, University of Münster, Münster, Nordrhein-Westfalen, DE  
115, Department of Psychiatry, Melbourne Medical School, University of Melbourne, Melbourne, AU  
116, Institute of Medical Genetics and Pathology, University Hospital Basel, University of Basel, Basel, CH  
117, Institute of Neuroscience and Medicine (INM-1), Research Center Juelich, Juelich, DE  
118, Amsterdam Public Health Institute, Vrije Universiteit Medical Center, Amsterdam, NL  
119, Centre for Integrative Biology, Università degli Studi di Trento, Trento, Trentino-Alto Adige, IT  
120, Department of Psychiatry and Psychotherapy, Medical Center, University of Freiburg, Faculty of Medicine, University of Freiburg, Freiburg, DE  
121, Psychiatry, Kaiser Permanente Northern California, San Francisco, CA, US  
122, Medical Research Council Human Genetics Unit, Institute of Genetics and Molecular Medicine, University of Edinburgh, Edinburgh, GB  
123, Department of Psychiatry, University of Toronto, Toronto, ON, CA  
124, Centre for Addiction and Mental Health, Toronto, ON, CA  
125, Division of Psychiatry, University College London, London, GB  
126, Neuroscience Therapeutic Area, Janssen Research and Development, LLC, Titusville, NJ, US  
127, Institute of Molecular and Cell Biology, University of Tartu, Tartu, EE  
128, Psychosis Research Unit, Aarhus University Hospital, Risskov, Aarhus, DK  
129, University of Liverpool, Liverpool, GB  
130, Mental Health Center Copenhagen, Copenhagen University Hospital, Copenhagen, DK  
131, Human Genetics and Computational Biomedicine, Pfizer Global Research and Development, Groton, CT, US  
132, Psychiatry, Harvard Medical School, Boston, MA, US  
133, Psychiatry, University of Iowa, Iowa City, IA, US  
134, Department of Psychiatry and Behavioral Sciences, Johns Hopkins University, Baltimore, MD, US  
135, Department of Psychiatry and Psychotherapy, University Medical Center Göttingen, Goettingen, Niedersachsen, DE  
136, Human Genetics Branch, NIMH Division of Intramural Research Programs, Bethesda, MD, US  
137, Faculty of Medicine, University of Iceland, Reykjavik, IS  
138, Child and Adolescent Psychiatry, Erasmus MC, Rotterdam, Zuid-Holland, NL  
139, Psychiatry, Erasmus MC, Rotterdam, Zuid-Holland, NL  
140, Psychiatry, Dalhousie University, Halifax, NS, CA  
141, Division of Epidemiology, New York State Psychiatric Institute, New York, NY, US  
142, Department of Clinical Medicine, University of Copenhagen, Copenhagen, DK  
143, Department of Medical & Molecular Genetics, King's College London, London, GB  
144, Psychiatry & Behavioral Sciences, Stanford University, Stanford, CA, US  
145, NIHR Maudsley Biomedical Research Centre, King's College London, London, GB

146, Genetics, University of North Carolina at Chapel Hill, Chapel Hill, NC, US

147, Psychiatry, University of North Carolina at Chapel Hill, Chapel Hill, NC, US

### **Bipolar Disorder Working Group of the Psychiatric Genomics Consortium**

Eli A Stahl 1, 2, 3, Gerome Breen 4, 5, Andreas J Forstner 6, 7, 8, 9, Andrew McQuillin 10, Stephan Ripke 11, 12, 13, Vassily Trubetsky 12, Manuel Mattheisen 14, 15, 16, 17, 18, Yunpeng Wang 19, 20, Jonathan R I Coleman 4, 5, H el ena A Gaspar 4, Christiaan A de Leeuw 21, Stacy Steinberg 22, Jennifer M Whitehead Pavlides 23, Maciej Trzaskowski 24, Tune H Pers 3, 25, Peter A Holmans 26, Liam Abbott 27, Esben Agerbo 18, 28, 29, Huda Akil 30, Diego Albani 31, Ney Alliey-Rodriguez 32, Thomas D Als 14, 15, 18, Adebayo Anjorin 33, Verneri Antilla 27, Swapnil Awasthi 12, Judith A Badner 34, Marie B ekvad-Hansen 18, 35, Jack D Barchas 36, Nicholas Bass 10, Michael Bauer 37, Sarah E Bergen 38, Carsten B ecker Pedersen 18, 28, 29, Erlend B oen 39, Marco Boks 40, James Boocock 41, Monika Budde 42, William Bunney 43, Margit Burmeister 44, Jonas Bybjerg-Grauholm 18, 35, William Byerley 45, Miquel Casas 46, 47, 48, 49, Felecia Cerrito 27, Pablo Cervantes 50, Alexander W Charney 2, Danfeng Chen 27, Claire Churchhouse 13, 27, Toni-Kim Clarke 51, William Coryell 52, David W Craig 53, Cristiana Cruceanu 54, David Curtis 55, 56, Piotr M Czerski 57, Anders M Dale 58, 59, 60, 61, Simone de Jong 4, 5, Franziska Degenhardt 8, 9, Jurgen Del-Favero 62, J Raymond DePaulo 63, Srdjan Djurovic 64, 65, Amanda L Dobbyn 1, 2, Ashley Dumont 27, Torbj orn Elvs ashagen 66, 67, Valentina Escott-Price 26, Chun Chieh Fan 61, Sascha B Fischer 6, Matthew Flickinger 68, Tatiana M Foroud 69, Liz Forty 26, Josef Frank 70, Christine Fraser 26, Nelson B Freimer 71, Louise Fris en 72, 73, 74, Katrin Gade 42, 75, Julie Garnham 76, Claudia Giambartolomei 41, Marianne Gi rtz Pedersen 18, 28, 29, Scott D Gordon 77, Katherine Gordon-Smith 78, Elaine K Green 79, Melissa J Green 80, Tiffany A Greenwood 60, Jakob Grove 14, 15, 18, 81, Weihua Guan 82, Jos e Guzman Parra 83, Marian L Hamshere 26, Martin Hautzinger 84, Urs Heilbronner 42, Stefan Herms 6, 8, 9, Maria Hipolito 85, Per Hoffmann 6, 8, 9, 86, Dominic Holland 58, 87, Laura Huckins 1, 2, St ephane Jamain 88, 89, Anders Jur eus 38, Radhika Kandaswamy 4, Robert Karlsson 38, James L Kennedy 90, 91, 92, 93, Sarah Kittel-Schneider 94, Sarah V Knott 78, James A Knowles 95, 96, Manolis Kogevinas 97, Anna C Koller 8, 9, Ralph Kupka 98, 99, 100, Catharina Lavebratt 72, Jacob Lawrence 101, William B Lawson 85, Markus Leber 102, Phil H Lee 11, 13, 103, Shawn E Levy 104, Jun Z Li 105, Chunyu Liu 106, Susanne Lucae 107, Anna Maaser 8, 9, Donald J MacIntyre 108, 109, Pamela B Mahon 63, 110, Wolfgang Maier 111, Lina Martinsson 73, Steve McCarroll 11, 112, Peter McGuffin 4, Melvin G McInnis 113, James D McKay 114, Helena Medeiros 96, Sarah E Medland 77, Fan Meng 30, 113, Lili Milani 115, Grant W Montgomery 24, Derek W Morris 116, 117, Thomas W M uhleisen 6, 118, Niamh Mullins 1, 4, Hoang Nguyen 1, 2, Caroline M Nievergelt 60, 119, Annelie Nordin Adolfsson 120, Evaristus A Nwulia 85, Claire O'Donovan 76, Loes M Olde Loohuis 71, Anil P S Ori 71, Lilijana Oruc 121, Urban  sby 122, Roy H Perlis 123, 124, Amy Perry 78, Andrea Pfennig 37, James B Potash 63, Shaun M Purcell 2, 110, Eline J Regeer 125, Andreas Reif 94, C eline S Reinbold 6, John P Rice 126, Fabio Rivas 83, Margarita Rivera 4, 127, Panos Roussos 1, 2, 128, Douglas M Ruderfer 129, Cristina S anchez-Mora 46, 47, 49, Alan F Schatzberg 130, William A Scheftner 131, Nicholas J Schork 132, Cynthia Shannon Weickert 80, 133, Tatyana Shekhtman 60, Paul D Shilling 60, Engilbert Sigurdsson 134, Claire Slaney 76, Olav B Smeland 58, 135, 136, Janet L Sobell 137, Christine S oholm Hansen 18, 35, Anne T Spijker 138, David St Clair 139, Michael Steffens 140, John S Strauss 92, 141, Fabian Streit 70, Jana Strohmaier 70, Szabolcs Szelinger 142, Robert C Thompson 113, Thorgeir E Thorgeirsson 22, Jens Treutlein 70, Helmut Vedder 143, Weiqing Wang 1, 2, Stanley J Watson 113, Thomas W Weickert 80, 133, Stephanie H Witt 70, Simon Xi 144, Wei Xu 145, 146, Allan H Young 147, Peter Zandi 148, Peng Zhang 149, Sebastian Zollner 113, Rolf Adolfsson 120, Ingrid Agartz 16, 39, 150, Martin Alda 76, 151, Lena Backlund 73, Bernhard T Baune 152, Frank Bellivier 153, 154, 155, 156, Wade H Berrettini 157, Joanna M Biernacka 158, Douglas H R Blackwood 51, Michael Boehnke 68, Anders D B orglum 14, 15, 18, Aiden Corvin 117, Nicholas Craddock 26, Mark J Daly 13, 27, Udo Dannlowski 159, T onu Esko 3, 112, 115, 160, Bruno Etain 153, 155, 156, 161, Mark Frye 162, Janice M Fullerton 133, 163, Elliot S Gershon 32, 164, Michael Gill 117, Fernando Goes 165, Maria Grigoriu-Serbanescu 166, Joanna Hauser 57, David M Hougaard 18, 35, Christina M Hultman 38, Ian Jones 26, Lisa A Jones 78, Ren e S Kahn 2, 40, George Kirov 26, Mikael Land en 38, 167, Marion Leboyer 89, 153, 168, Cathryn M Lewis 4, 169, Qingqin S Li 170, Jolanta Lissowska 171, Nicholas G Martin 77, 172, Fermin Mayoral 83, Susan L McElroy 173, Andrew M McIntosh 51, 174, Francis J McMahon 175, Ingrid Melle 176, 177, Andres Metspalu 115, 178, Philip B Mitchell 80, Gunnar Morken 179, 180, Ole Mors 18, 181, Preben Bo Mortensen 14, 18, 28, 29, Bertram M uller-Myhsok 54, 182, 183, Richard M Myers 104, Benjamin M Neale 3, 11, 13, 13, 27, Vishwajit Nimgaonkar 184, Merete Nordentoft 18, 185, Markus M N othen

8, 9, Michael C O'Donovan 26, Ketil J Oedegaard 186, 187, Michael J Owen 26, Sara A Paciga 188, Carlos Pato 96, 189, Michele T Pato 96, Danielle Posthuma 190, 191, Josep Antoni Ramos-Quiroga 46, 47, 48, 49, Marta Ribasés 46, 47, 49, Marcella Rietschel 70, Guy A Rouleau 192, 193, Martin Schalling 72, Peter R Schofield 133, 163, Thomas G Schulze 42, 63, 70, 75, 175, Alessandro Serretti 194, Jordan W Smoller 11, 195, 196, Hreinn Stefansson 22, Kari Stefansson 22, 197, Eystein Stordal 198, 199, Patrick F Sullivan 38, 200, 201, Gustavo Turecki 202, Arne E Vaaler 203, Eduard Vieta 204, John B Vincent 141, Thomas Werge 18, 205, 206, John I Nurnberger 207, Naomi R Wray 23, 24, Arianna Di Florio 26, 201, Howard J Edenberg 208, Sven Cichon 6, 8, 86, 118, Roel A Ophoff 209, 210, Laura J Scott 68, Ole A Andreassen 135, 136, John Kelsoe 60, Pamela Sklar 1, 2, 128

- 1, Department of Genetics and Genomic Sciences, Icahn School of Medicine at Mount Sinai, New York, NY, US
- 2, Department of Psychiatry, Icahn School of Medicine at Mount Sinai, New York, NY, US
- 3, Medical and Population Genetics, Broad Institute, Cambridge, MA, US
- 4, MRC Social, Genetic and Developmental Psychiatry Centre, King's College London, London, GB
- 5, NIHR BRC for Mental Health, King's College London, London, GB
- 6, Department of Biomedicine, University of Basel, Basel, CH
- 7, Department of Psychiatry (UPK), University of Basel, Basel, CH
- 8, Institute of Human Genetics, University of Bonn, Bonn, DE
- 9, Life&Brain Center, Department of Genomics, University of Bonn, Bonn, DE
- 10, Division of Psychiatry, University College London, London, GB
- 11, Stanley Center for Psychiatric Research, Broad Institute, Cambridge, MA, US
- 12, Department of Psychiatry and Psychotherapy, Charité - Universitätsmedizin, Berlin, DE
- 13, Analytic and Translational Genetics Unit, Massachusetts General Hospital, Boston, MA, US
- 14, iSEQ, Center for Integrative Sequencing, Aarhus University, Aarhus, DK
- 15, Department of Biomedicine - Human Genetics, Aarhus University, Aarhus, DK
- 16, Department of Clinical Neuroscience, Centre for Psychiatry Research, Karolinska Institutet, Stockholm, SE
- 17, Department of Psychiatry, Psychosomatics and Psychotherapy, Center of Mental Health, University Hospital Würzburg, Würzburg, DE
- 18, iPSYCH, The Lundbeck Foundation Initiative for Integrative Psychiatric Research, DK
- 19, Institute of Biological Psychiatry, Mental Health Centre Sct. Hans, Copenhagen, DK
- 20, Institute of Clinical Medicine, University of Oslo, Oslo, NO
- 21, Department of Complex Trait Genetics, Center for Neurogenomics and Cognitive Research Neuroscience, Vrije Universiteit Amsterdam, Amsterdam, NL
- 22, deCODE Genetics / Amgen, Reykjavik, IS
- 23, Queensland Brain Institute, The University of Queensland, Brisbane, QLD, AU
- 24, Institute for Molecular Bioscience, The University of Queensland, Brisbane, QLD, AU
- 25, Division of Endocrinology and Center for Basic and Translational Obesity Research, Boston Children's Hospital, Boston, MA, US
- 26, Medical Research Council Centre for Neuropsychiatric Genetics and Genomics, Division of Psychological Medicine and Clinical Neurosciences, Cardiff University, Cardiff, GB
- 27, Stanley Center for Psychiatric Research, Broad Institute, Boston, MA, US
- 28, National Centre for Register-Based Research, Aarhus University, Aarhus, DK
- 29, Centre for Integrated Register-based Research, Aarhus University, Aarhus, DK
- 30, Molecular & Behavioral Neuroscience Institute, University of Michigan, Ann Arbor, MI, US
- 31, NEUROSCIENCE, Istituto Di Ricerche Farmacologiche Mario Negri, Milano, IT
- 32, Department of Psychiatry and Behavioral Neuroscience, University of Chicago, Chicago, IL, US
- 33, Psychiatry, Berkshire Healthcare NHS Foundation Trust, Bracknell, GB
- 34, Psychiatry, Rush University Medical Center, Chicago, IL, US
- 35, Center for Neonatal Screening, Department for Congenital Disorders, Statens Serum Institut, Copenhagen, DK
- 36, Department of Psychiatry, Weill Cornell Medical College, New York, NY, US
- 37, Department of Psychiatry and Psychotherapy, University Hospital Carl Gustav Carus, Technische Universität Dresden, Dresden, DE
- 38, Department of Medical Epidemiology and Biostatistics, Karolinska Institutet, Stockholm, SE
- 39, Department of Psychiatric Research, Diakonhjemmet Hospital, Oslo, NO
- 40, Psychiatry, UMC Utrecht Hersencentrum Rudolf Magnus, Utrecht, NL
- 41, Human Genetics, University of California Los Angeles, Los Angeles, CA, US

42, Institute of Psychiatric Phenomics and Genomics (IPPG), Medical Center of the University of Munich, Munich, DE

43, Department of Psychiatry and Human Behavior, University of California, Irvine, Irvine, CA, US

44, Molecular & Behavioral Neuroscience Institute and Department of Computational Medicine & Bioinformatics, University of Michigan, Ann Arbor, MI, US

45, Psychiatry, University of California San Francisco, San Francisco, CA, US

46, Instituto de Salud Carlos III, Biomedical Network Research Centre on Mental Health (CIBERSAM), Madrid, ES

47, Department of Psychiatry, Hospital Universitari Vall d'Hebron, Barcelona, ES

48, Department of Psychiatry and Forensic Medicine, Universitat Autònoma de Barcelona, Barcelona, ES

49, Psychiatric Genetics Unit, Group of Psychiatry Mental Health and Addictions, Vall d'Hebron Research Institut (VHIR), Universitat Autònoma de Barcelona, Barcelona, ES

50, Department of Psychiatry, Mood Disorders Program, McGill University Health Center, Montreal, QC, CA

51, Division of Psychiatry, University of Edinburgh, Edinburgh, GB

52, University of Iowa Hospitals and Clinics, Iowa City, IA, US

53, Translational Genomics, USC, Phoenix, AZ, US

54, Department of Translational Research in Psychiatry, Max Planck Institute of Psychiatry, Munich, DE

55, Centre for Psychiatry, Queen Mary University of London, London, GB

56, UCL Genetics Institute, University College London, London, GB

57, Department of Psychiatry, Laboratory of Psychiatric Genetics, Poznan University of Medical Sciences, Poznan, PL

58, Department of Neurosciences, University of California San Diego, La Jolla, CA, US

59, Department of Radiology, University of California San Diego, La Jolla, CA, US

60, Department of Psychiatry, University of California San Diego, La Jolla, CA, US

61, Department of Cognitive Science, University of California San Diego, La Jolla, CA, US

62, Applied Molecular Genomics Unit, VIB Department of Molecular Genetics, University of Antwerp, Antwerp, Belgium

63, Department of Psychiatry and Behavioral Sciences, Johns Hopkins University School of Medicine, Baltimore, MD, US

64, Department of Medical Genetics, Oslo University Hospital Ullevål, Oslo, NO

65, NORMENT, KG Jebsen Centre for Psychosis Research, Department of Clinical Science, University of Bergen, Bergen, NO

66, Department of Neurology, Oslo University Hospital, Oslo, NO

67, NORMENT, KG Jebsen Centre for Psychosis Research, Oslo University Hospital, Oslo, NO

68, Center for Statistical Genetics and Department of Biostatistics, University of Michigan, Ann Arbor, MI, US

69, Department of Medical & Molecular Genetics, Indiana University, Indianapolis, IN, US

70, Department of Genetic Epidemiology in Psychiatry, Central Institute of Mental Health, Medical Faculty Mannheim, Heidelberg University, Mannheim, DE

71, Center for Neurobehavioral Genetics, University of California Los Angeles, Los Angeles, CA, US

72, Department of Molecular Medicine and Surgery, Karolinska Institutet and Center for Molecular Medicine, Karolinska University Hospital, Stockholm, SE

73, Department of Clinical Neuroscience, Karolinska Institutet and Center for Molecular Medicine, Karolinska University Hospital, Stockholm, SE

74, Child and Adolescent Psychiatry Research Center, Stockholm, SE

75, Department of Psychiatry and Psychotherapy, University Medical Center Göttingen, Göttingen, DE

76, Department of Psychiatry, Dalhousie University, Halifax, NS, CA

77, Genetics and Computational Biology, QIMR Berghofer Medical Research Institute, Brisbane, QLD, AU

78, Department of Psychological Medicine, University of Worcester, Worcester, GB

79, School of Biomedical and Healthcare Sciences, Plymouth University Peninsula Schools of Medicine and Dentistry, Plymouth, GB

80, School of Psychiatry, University of New South Wales, Sydney, NSW, AU

81, Bioinformatics Research Centre, Aarhus University, Aarhus, DK

82, Biostatistics, University of Minnesota System, Minneapolis, MN, US

83, Mental Health Department, University Regional Hospital. Biomedicine Institute (IBIMA), Málaga, ES

84, Department of Psychology, Eberhard Karls Universität Tübingen, Tübingen, DE

85, Department of Psychiatry and Behavioral Sciences, Howard University Hospital, Washington, DC, US

86, Institute of Medical Genetics and Pathology, University Hospital Basel, Basel, CH

87, Center for Multimodal Imaging and Genetics, University of California San Diego, La Jolla, CA, US  
88, Psychiatrie Translationnelle, Inserm U955, Créteil, FR  
89, Faculté de Médecine, Université Paris Est, Créteil, FR  
90, Campbell Family Mental Health Research Institute, Centre for Addiction and Mental Health, Toronto, ON, CA  
91, Neurogenetics Section, Centre for Addiction and Mental Health, Toronto, ON, CA  
92, Department of Psychiatry, University of Toronto, Toronto, ON, CA  
93, Institute of Medical Sciences, University of Toronto, Toronto, ON, CA  
94, Department of Psychiatry, Psychosomatic Medicine and Psychotherapy, University Hospital Frankfurt, Frankfurt am Main, DE  
95, Cell Biology, SUNY Downstate Medical Center College of Medicine, Brooklyn, NY, US  
96, Institute for Genomic Health, SUNY Downstate Medical Center College of Medicine, Brooklyn, NY, US  
97, Center for Research in Environmental Epidemiology (CREAL), Barcelona, ES  
98, Psychiatry, Altrecht, Utrecht, NL  
99, Psychiatry, GGZ inGeest, Amsterdam, NL  
100, Psychiatry, VU medisch centrum, Amsterdam, NL  
101, Psychiatry, North East London NHS Foundation Trust, Ilford, GB  
102, Clinic for Psychiatry and Psychotherapy, University Hospital Cologne, Cologne, DE  
103, Psychiatric and Neurodevelopmental Genetics Unit, Massachusetts General Hospital, Boston, MA, US  
104, HudsonAlpha Institute for Biotechnology, Huntsville, AL, US  
105, Department of Human Genetics, University of Michigan, Ann Arbor, MI, US  
106, Psychiatry, University of Illinois at Chicago College of Medicine, Chicago, IL, US  
107, Max Planck Institute of Psychiatry, Munich, DE  
108, Mental Health, NHS 24, Glasgow, GB  
109, Division of Psychiatry, Centre for Clinical Brain Sciences, University of Edinburgh, Edinburgh, GB  
110, Psychiatry, Brigham and Women's Hospital, Boston, MA, US  
111, Department of Psychiatry and Psychotherapy, University of Bonn, Bonn, DE  
112, Department of Genetics, Harvard Medical School, Boston, MA, US  
113, Department of Psychiatry, University of Michigan, Ann Arbor, MI, US  
114, Genetic Cancer Susceptibility Group, International Agency for Research on Cancer, Lyon, FR  
115, Estonian Genome Center, University of Tartu, Tartu, EE  
116, Discipline of Biochemistry, Neuroimaging and Cognitive Genomics (NICOG) Centre, National University of Ireland, Galway, Galway, IE  
117, Neuropsychiatric Genetics Research Group, Dept of Psychiatry and Trinity Translational Medicine Institute, Trinity College Dublin, Dublin, IE  
118, Institute of Neuroscience and Medicine (INM-1), Research Centre Jülich, Jülich, DE  
119, Research/Psychiatry, Veterans Affairs San Diego Healthcare System, San Diego, CA, US  
120, Department of Clinical Sciences, Psychiatry, Umeå University Medical Faculty, Umeå, SE  
121, Department of Clinical Psychiatry, Psychiatry Clinic, Clinical Center University of Sarajevo, Sarajevo, BA  
122, Department of Neurobiology, Care sciences, and Society, Karolinska Institutet and Center for Molecular Medicine, Karolinska University Hospital, Stockholm, SE  
123, Psychiatry, Harvard Medical School, Boston, MA, US  
124, Division of Clinical Research, Massachusetts General Hospital, Boston, MA, US  
125, Outpatient Clinic for Bipolar Disorder, Altrecht, Utrecht, NL  
126, Department of Psychiatry, Washington University in Saint Louis, Saint Louis, MO, US  
127, Department of Biochemistry and Molecular Biology II, Institute of Neurosciences, Center for Biomedical Research, University of Granada, Granada, ES  
128, Department of Neuroscience, Icahn School of Medicine at Mount Sinai, New York, NY, US  
129, Medicine, Psychiatry, Biomedical Informatics, Vanderbilt University Medical Center, Nashville, TN, US  
130, Psychiatry and Behavioral Sciences, Stanford University School of Medicine, Stanford, CA, US  
131, Rush University Medical Center, Chicago, IL, US  
132, Scripps Translational Science Institute, La Jolla, CA, US  
133, Neuroscience Research Australia, Sydney, NSW, AU  
134, Faculty of Medicine, Department of Psychiatry, School of Health Sciences, University of Iceland, Reykjavik, IS  
135, Div Mental Health and Addiction, Oslo University Hospital, Oslo, NO  
136, NORMENT, University of Oslo, Oslo, NO



137, Psychiatry and the Behavioral Sciences, University of Southern California, Los Angeles, CA, US  
138, Mood Disorders, PsyQ, Rotterdam, NL  
139, Institute for Medical Sciences, University of Aberdeen, Aberdeen, UK  
140, Research Division, Federal Institute for Drugs and Medical Devices (BfArM), Bonn, DE  
141, Centre for Addiction and Mental Health, Toronto, ON, CA  
142, Neurogenomics, TGen, Los Angeles, AZ, US  
143, Psychiatry, Psychiatrisches Zentrum Nordbaden, Wiesloch, DE  
144, Computational Sciences Center of Emphasis, Pfizer Global Research and Development, Cambridge, MA, US  
145, Department of Biostatistics, Princess Margaret Cancer Centre, Toronto, ON, CA  
146, Dalla Lana School of Public Health, University of Toronto, Toronto, ON, CA  
147, Psychological Medicine, Institute of Psychiatry, Psychology & Neuroscience, King's College London, London, GB  
148, Department of Mental Health, Johns Hopkins University Bloomberg School of Public Health, Baltimore, MD, US  
149, Institute of Genetic Medicine, Johns Hopkins University School of Medicine, Baltimore, MD, US  
150, NORMENT, KG Jebsen Centre for Psychosis Research, Division of Mental Health and Addiction, Institute of Clinical Medicine and Diakonhjemmet Hospital, University of Oslo, Oslo, NO  
151, National Institute of Mental Health, Klecany, CZ  
152, Discipline of Psychiatry, University of Adelaide, Adelaide, SA, AU  
153, Department of Psychiatry and Addiction Medicine, Assistance Publique - Hôpitaux de Paris, Paris, FR  
154, Paris Bipolar and TRD Expert Centres, FondaMental Foundation, Paris, FR  
155, UMR-S1144 Team 1 : Biomarkers of relapse and therapeutic response in addiction and mood disorders, INSERM, Paris, FR  
156, Psychiatry, Université Paris Diderot, Paris, FR  
157, Psychiatry, University of Pennsylvania, Philadelphia, PA, US  
158, Health Sciences Research, Mayo Clinic, Rochester, MN, US  
159, Department of Psychiatry, University of Münster, Münster, DE  
160, Division of Endocrinology, Children's Hospital Boston, Boston, MA, US  
161, Centre for Affective Disorders, Institute of Psychiatry, Psychology and Neuroscience, London, GB  
162, Department of Psychiatry & Psychology, Mayo Clinic, Rochester, MN, US  
163, School of Medical Sciences, University of New South Wales, Sydney, NSW, AU  
164, Department of Human Genetics, University of Chicago, Chicago, IL, US  
165, Department of Psychiatry and Behavioral Sciences, Johns Hopkins University School of Medicine, Baltimore, MD, US  
166, Biometric Psychiatric Genetics Research Unit, Alexandru Obregia Clinical Psychiatric Hospital, Bucharest, RO  
167, Institute of Neuroscience and Physiology, University of Gothenburg, Gothenburg, SE  
168, INSERM, Paris, FR  
169, Department of Medical & Molecular Genetics, King's College London, London, GB  
170, Neuroscience Therapeutic Area, Janssen Research and Development, LLC, Titusville, NJ, US  
171, Cancer Epidemiology and Prevention, M. Skłodowska-Curie Cancer Center and Institute of Oncology, Warsaw, PL  
172, School of Psychology, The University of Queensland, Brisbane, QLD, AU  
173, Research Institute, Lindner Center of HOPE, Mason, OH, US  
174, Centre for Cognitive Ageing and Cognitive Epidemiology, University of Edinburgh, Edinburgh, GB  
175, Human Genetics Branch, Intramural Research Program, National Institute of Mental Health, Bethesda, MD, US  
176, Division of Mental Health and Addiction, Oslo University Hospital, Oslo, NO  
177, Division of Mental Health and Addiction, University of Oslo, Institute of Clinical Medicine, Oslo, NO  
178, Institute of Molecular and Cell Biology, University of Tartu, Tartu, EE  
179, Mental Health, Faculty of Medicine and Health Sciences, Norwegian University of Science and Technology - NTNU, Trondheim, NO  
180, Psychiatry, St Olavs University Hospital, Trondheim, NO  
181, Psychosis Research Unit, Aarhus University Hospital, Risskov, DK  
182, Munich Cluster for Systems Neurology (SyNergy), Munich, DE  
183, University of Liverpool, Liverpool, GB

184, Psychiatry and Human Genetics, University of Pittsburgh, Pittsburgh, PA, US  
185, Mental Health Services in the Capital Region of Denmark, Mental Health Center Copenhagen, University of Copenhagen, Copenhagen, DK  
186, Division of Psychiatry, Haukeland Universitetssjukehus, Bergen, NO  
187, Faculty of Medicine and Dentistry, University of Bergen, Bergen, NO  
188, Human Genetics and Computational Biomedicine, Pfizer Global Research and Development, Groton, CT, US  
189, College of Medicine Institute for Genomic Health, SUNY Downstate Medical Center College of Medicine, Brooklyn, NY, US  
190, Department of Complex Trait Genetics, Center for Neurogenomics and Cognitive Research, Amsterdam Neuroscience, Vrije Universiteit Amsterdam, Amsterdam, NL  
191, Department of Clinical Genetics, Amsterdam Neuroscience, Vrije Universiteit Medical Center, Amsterdam, NL  
192, Department of Neurology and Neurosurgery, McGill University, Faculty of Medicine, Montreal, QC, CA  
193, Montreal Neurological Institute and Hospital, Montreal, QC, CA  
194, Department of Biomedical and NeuroMotor Sciences, University of Bologna, Bologna, IT  
195, Department of Psychiatry, Massachusetts General Hospital, Boston, MA, US  
196, Psychiatric and Neurodevelopmental Genetics Unit (PNGU), Massachusetts General Hospital, Boston, MA, US  
197, Faculty of Medicine, University of Iceland, Reykjavik, IS  
198, Department of Psychiatry, Hospital Namsos, Namsos, NO  
199, Department of Neuroscience, Norges Teknisk Naturvitenskapelige Universitet Fakultet for naturvitenskap og teknologi, Trondheim, NO  
200, Department of Genetics, University of North Carolina at Chapel Hill, Chapel Hill, NC, US  
201, Department of Psychiatry, University of North Carolina at Chapel Hill, Chapel Hill, NC, US  
202, Department of Psychiatry, McGill University, Montreal, QC, CA  
203, Dept of Psychiatry, Sankt Olavs Hospital Universitetssykehuset i Trondheim, Trondheim, NO  
204, Clinical Institute of Neuroscience, Hospital Clinic, University of Barcelona, IDIBAPS, CIBERSAM, Barcelona, SP  
205, Institute of Biological Psychiatry, MHC Sct. Hans, Mental Health Services Copenhagen, Roskilde, DK  
206, Department of Clinical Medicine, University of Copenhagen, Copenhagen, DK  
207, Psychiatry, Indiana University School of Medicine, Indianapolis, IN, US  
208, Biochemistry and Molecular Biology, Indiana University School of Medicine, Indianapolis, IN, US  
209, Jane and Terry Semel Institute for Neuroscience and Human Behavior, Los Angeles, CA, US  
210, UMC Utrecht Hersencentrum Rudolf Magnus, Utrecht, NL

### **Schizophrenia Working Group of the Psychiatric Genomics Consortium**

Stephan Ripke<sup>1,2</sup>, Benjamin M. Neale<sup>1,2,3,4</sup>, Aiden Corvin<sup>5</sup>, James T. R. Walters<sup>6</sup>, Kai-How Farh<sup>1</sup>, Peter A. Holmans<sup>6,7</sup>, Phil Lee<sup>1,2,4</sup>, Brendan Bulik-Sullivan<sup>1,2</sup>, David A. Collier<sup>8,9</sup>, Hailiang Huang<sup>1,3</sup>, Tune H. Pers<sup>3,10,11</sup>, Ingrid Agartz<sup>12,13,14</sup>, Esben Agerbo<sup>15,16,17</sup>, Margot Albus<sup>18</sup>, Madeline Alexander<sup>19</sup>, Farooq Amin<sup>20,21</sup>, Silviu A. Bacanu<sup>22</sup>, Martin Begemann<sup>23</sup>, Richard A. Belliveau Jr<sup>2</sup>, Judit Bene<sup>24,25</sup>, Sarah E. Bergen<sup>2,26</sup>, Elizabeth Bevilacqua<sup>2</sup>, Tim B. Bigdeli<sup>22</sup>, Donald W. Black<sup>27</sup>, Richard Bruggeman<sup>28</sup>, Nancy G. Buccola<sup>29</sup>, Randy L. Buckner<sup>30,31,32</sup>, William Byerley<sup>33</sup>, Wiepke Cahn<sup>34</sup>, Guiqing Cai<sup>35,36</sup>, Dominique Champion<sup>37</sup>, Rita M. Cantor<sup>38</sup>, Vaughan J. Carr<sup>39,40</sup>, Noa Carrera<sup>6</sup>, Stanley V. Catts<sup>39,41</sup>, Kimberly D. Chambert<sup>2</sup>, Raymond C. K. Chan<sup>42</sup>, Ronald Y. L. Chen<sup>43</sup>, Eric Y. H. Chen<sup>43,44</sup>, Wei Cheng<sup>45</sup>, Eric F. C. Cheung<sup>46</sup>, Siow Ann Chong<sup>47</sup>, C. Robert Cloninger<sup>48</sup>, David Cohen<sup>49</sup>, Nadine Cohen<sup>50</sup>, Paul Cormican<sup>5</sup>, Nick Craddock<sup>6,7</sup>, James J. Crowley<sup>51</sup>, David Curtis<sup>52,53</sup>, Michael Davidson<sup>54</sup>, Kenneth L. Davis<sup>36</sup>, Franziska Degenhardt<sup>55,56</sup>, Jurgen Del Favero<sup>57</sup>, Ditte Demontis<sup>17,58,59</sup>, Dimitris Dikeos<sup>60</sup>, Timothy Dinan<sup>61</sup>, Srdjan

Djurovic<sup>14,62</sup>, Gary Donohoe<sup>5,63</sup>, Elodie Drapeau<sup>36</sup>, Jubao Duan<sup>64,65</sup>, Frank Dudbridge<sup>66</sup>, Naser Durmishi<sup>67</sup>, Peter Eichhammer<sup>68</sup>, Johan Eriksson<sup>69,70,71</sup>, Valentina Escott-Price<sup>6</sup>, Laurent Essioux<sup>72</sup>, Ayman H. Fanous<sup>73,74,75,76</sup>, Martilias S. Farrell<sup>51</sup>, Josef Frank<sup>77</sup>, Lude Franke<sup>78</sup>, Robert Freedman<sup>79</sup>, Nelson B. Freimer<sup>80</sup>, Marion Friedl<sup>81</sup>, Joseph I. Friedman<sup>36</sup>, Menachem Fromer<sup>1,2,4,82</sup>, Giulio Genovese<sup>2</sup>, Lyudmila Georgieva<sup>6</sup>, Ina Giegling<sup>81,83</sup>, Paola Giusti-Rodríguez<sup>51</sup>, Stephanie Godard<sup>84</sup>, Jacqueline I. Goldstein<sup>1,3</sup>, Vera Golimbet<sup>85</sup>, Srihari Gopal<sup>86</sup>, Jacob Gratten<sup>87</sup>, Lieuwe de Haan<sup>88</sup>, Christian Hammer<sup>23</sup>, Marian L. Hamshere<sup>6</sup>, Mark Hansen<sup>89</sup>, Thomas Hansen<sup>17,90</sup>, Vahram Haroutunian<sup>36,91,92</sup>, Annette M. Hartmann<sup>81</sup>, Frans A. Henskens<sup>39,93,94</sup>, Stefan Herms<sup>55,56,95</sup>, Joel N. Hirschhorn<sup>3,11,96</sup>, Per Hoffmann<sup>55,56,95</sup>, Andrea Hofman<sup>55,56</sup>, Mads V. Hollegaard<sup>97</sup>, David M. Hougaard<sup>97</sup>, Masashi Ikeda<sup>98</sup>, Inge Joa<sup>99</sup>, Antonio Julia<sup>100</sup>, René S. Kahn<sup>34</sup>, Luba Kalaydjieva<sup>101,102</sup>, Sena Karachanak-Yankova<sup>103</sup>, Juha Karjalainen<sup>78</sup>, David Kavanagh<sup>6</sup>, Matthew C. Keller<sup>104</sup>, James L. Kennedy<sup>105,106,107</sup>, Andrey Khrunin<sup>108</sup>, Yunjung Kim<sup>51</sup>, Janis Klovinis<sup>109</sup>, James A. Knowles<sup>110</sup>, Bettina Konte<sup>81</sup>, Vaidutis Kucinskas<sup>111</sup>, Zita Ausrele Kucinskiene<sup>111</sup>, Hana Kuzelova-Ptackova<sup>112</sup>, Anna K. Kähler<sup>26</sup>, Claudine Laurent<sup>19,113</sup>, Jimmy Lee Chee Keong<sup>47,114</sup>, S. Hong Lee<sup>87</sup>, Sophie E. Legge<sup>6</sup>, Bernard Lerer<sup>115</sup>, Miaoxin Li<sup>43,44,116</sup>, Tao Li<sup>117</sup>, Kung-Yee Liang<sup>118</sup>, Jeffrey Lieberman<sup>119</sup>, Svetlana Limborska<sup>108</sup>, Carmel M. Loughland<sup>39,120</sup>, Jan Lubinski<sup>121</sup>, Jouko Lonngqvist<sup>122</sup>, Milan Macek Jr<sup>112</sup>, Patrik K. E. Magnusson<sup>26</sup>, Brion S. Maher<sup>123</sup>, Wolfgang Maier<sup>124</sup>, Jacques Mallet<sup>125</sup>, Sara Marsal<sup>100</sup>, Manuel Mattheisen<sup>17,58,59,126</sup>, Morten Mattingsdal<sup>14,127</sup>, Robert W. McCarley<sup>128,129</sup>, Colm McDonald<sup>130</sup>, Andrew M. McIntosh<sup>131,132</sup>, Sandra Meier<sup>77</sup>, Carin J. Meijer<sup>88</sup>, Bela Melegh<sup>24,25</sup>, Ingrid Melle<sup>14,133</sup>, Raquelle I. Meshulam-Gately<sup>128,134</sup>, Andres Metspalu<sup>135</sup>, Patricia T. Michie<sup>39,136</sup>, Lili Milani<sup>135</sup>, Vihra Milanova<sup>137</sup>, Younes Mokrab<sup>8</sup>, Derek W. Morris<sup>5,63</sup>, Ole Mors<sup>17,58,138</sup>, Kieran C. Murphy<sup>139</sup>, Robin M. Murray<sup>140</sup>, Inez Myin-Germeys<sup>141</sup>, Bertram Muller-Myhsok<sup>142,143,144</sup>, Mari Nelis<sup>135</sup>, Igor Nenadic<sup>145</sup>, Deborah A. Nertney<sup>146</sup>, Gerald Nestadt<sup>147</sup>, Kristin K. Nicodemus<sup>148</sup>, Liene Nikitina-Zake<sup>109</sup>, Laura Nisenbaum<sup>149</sup>, Annelie Nordin<sup>150</sup>, Eadbhard O'Callaghan<sup>151</sup>, Colm O'Dushlaine<sup>2</sup>, F. Anthony O'Neill<sup>152</sup>, Sang-Yun Oh<sup>153</sup>, Ann Olincy<sup>79</sup>, Line Olsen<sup>17,90</sup>, Jim Van Os<sup>141,154</sup>, Psychosis Endophenotypes International Consortium<sup>155</sup>, Christos Pantelis<sup>39,156</sup>, George N. Papadimitriou<sup>60</sup>, Sergi Papiol<sup>23</sup>, Elena Parkhomenko<sup>36</sup>, Michele T. Pato<sup>110</sup>, Tiina Paunio<sup>157,158</sup>, Milica Pejovic-Milovancevic<sup>159</sup>, Diana O. Perkins<sup>160</sup>, Olli Pietiläinen<sup>158,161</sup>, Jonathan Pimm<sup>53</sup>, Andrew J. Pocklington<sup>6</sup>, John Powell<sup>140</sup>, Alkes Price<sup>3,162</sup>, Ann E. Pulver<sup>147</sup>, Shaun M. Purcell<sup>82</sup>, Digby Quested<sup>163</sup>, Henrik B. Rasmussen<sup>17,90</sup>, Abraham Reichenberg<sup>36</sup>, Mark A. Reimers<sup>164</sup>, Alexander L. Richards<sup>6</sup>, Joshua L. Roffman<sup>30,32</sup>, Panos Roussos<sup>82,165</sup>, Douglas M. Ruderfer<sup>6,82</sup>, Veikko Salomaa<sup>71</sup>, Alan R. Sanders<sup>64,65</sup>, Ulrich Schall<sup>39,120</sup>, Christian R. Schubert<sup>166</sup>, Thomas G. Schulze<sup>77,167</sup>, Sibylle G. Schwab<sup>168</sup>, Edward M. Scolnick<sup>2</sup>, Rodney J. Scott<sup>39,169,170</sup>, Larry J. Seidman<sup>128,134</sup>, Jianxin Shi<sup>171</sup>, Engilbert Sigurdsson<sup>172</sup>, Teimuraz Silagadze<sup>173</sup>, Jeremy M. Silverman<sup>36,174</sup>, Kang Sim<sup>47</sup>, Petr Slominsky<sup>108</sup>, Jordan W. Smoller<sup>2,4</sup>, Hon-Cheong So<sup>43</sup>, Chris C. A. Spencer<sup>175</sup>, Eli A. Stahl<sup>3,82</sup>, Hreinn Stefansson<sup>176</sup>, Stacy Steinberg<sup>176</sup>, Elisabeth Stogmann<sup>177</sup>, Richard E. Straub<sup>178</sup>, Eric Strengman<sup>179,34</sup>, Jana Strohmaier<sup>77</sup>, T. Scott Stroup<sup>119</sup>, Mythily Subramaniam<sup>47</sup>, Jaana Suvisaari<sup>122</sup>, Dragan M. Svrakic<sup>48</sup>, Jin P. Szatkiewicz<sup>51</sup>, Erik Söderman<sup>12</sup>, Srinivas Thirumalai<sup>180</sup>, Draga Toncheva<sup>103</sup>, Sarah Tosato<sup>181</sup>, Juha Veijola<sup>182,183</sup>, John Waddington<sup>184</sup>, Dermot Walsh<sup>185</sup>, Dai Wang<sup>86</sup>, Qiang Wang<sup>117</sup>, Bradley T. Webb<sup>22</sup>, Mark Weiser<sup>54</sup>, Dieter B. Wildenauer<sup>186</sup>, Nigel M. Williams<sup>6</sup>, Stephanie Williams<sup>51</sup>, Stephanie H. Witt<sup>77</sup>, Aaron R. Wolen<sup>164</sup>, Emily H. M. Wong<sup>43</sup>, Brandon K. Wormley<sup>22</sup>, Hualin Simon Xi<sup>187</sup>, Clement C. Zai<sup>105,106</sup>, Xuebin Zheng<sup>188</sup>, Fritz Zimprich<sup>177</sup>, Naomi R. Wray<sup>87</sup>, Kari Stefansson<sup>176</sup>, Peter M. Visscher<sup>87</sup>, Wellcome Trust Case-Control Consortium 2, Rolf Adolfsson<sup>150</sup>, Ole A. Andreassen<sup>14,133</sup>, Douglas H. R. Blackwood<sup>132</sup>, Elvira Bramon<sup>190</sup>, Joseph D. Buxbaum<sup>35,36,91,191</sup>, Anders D. Børglum<sup>17,58,59,138</sup>, Sven Cichon<sup>55,56,95,192</sup>, Ariel Darvasi<sup>193</sup>, Enrico Domenici<sup>194</sup>, Hannelore Ehrenreich<sup>23</sup>, Tõnu Esko<sup>3,11,96,135</sup>, Pablo V. Gejman<sup>64,65</sup>, Michael Gill<sup>5</sup>, Hugh Gurling<sup>53</sup>, Christina M. Hultman<sup>26</sup>, Nakao Iwata<sup>98</sup>, Assen V. Jablensky<sup>39,102,186,195</sup>, Erik G. Jönsson<sup>12,14</sup>, Kenneth S. Kendler<sup>196</sup>,

George Kirov<sup>6</sup>, Jo Knight<sup>105,106,107</sup>, Todd Lencz<sup>197,198,199</sup>, Douglas F. Levinson<sup>19</sup>, Qingqin S. Li<sup>86</sup>, Jianjun Liu<sup>188,200</sup>, Anil K. Malhotra<sup>197,198,199</sup>, Steven A. McCarrroll<sup>2,96</sup>, Andrew McQuillin<sup>53</sup>, Jennifer L. Moran<sup>2</sup>, Preben B. Mortensen<sup>15,16,17</sup>, Bryan J. Mowry<sup>87,201</sup>, Markus M. Nöthen<sup>55,56</sup>, Roel A. Ophoff<sup>38,80,34</sup>, Michael J. Owen<sup>6,7</sup>, Aarno Palotie<sup>2,4,161</sup>, Carlos N. Pato<sup>110</sup>, Tracey L. Petryshen<sup>2,128,202</sup>, Danielle Posthuma<sup>203,204,205</sup>, Marcella Rietschel<sup>77</sup>, Brien P. Riley<sup>196</sup>, Dan Rujescu<sup>81,83</sup>, Pak C. Sham<sup>43,44,116</sup>, Pamela Sklar<sup>82,91,165</sup>, David St Clair<sup>206</sup>, Daniel R. Weinberger<sup>178,207</sup>, Jens R. Wendland<sup>166</sup>, Thomas Werge<sup>17,90,208</sup>, Mark J. Daly<sup>1,2,3</sup>, Patrick F. Sullivan<sup>26,51,160</sup> & Michael C. O'Donovan<sup>6,7</sup>

<sup>1</sup>Analytic and Translational Genetics Unit, Massachusetts General Hospital, Boston, Massachusetts 02114, USA. <sup>2</sup>Stanley Center for Psychiatric Research, Broad Institute of MIT and Harvard, Cambridge, Massachusetts 02142, USA. <sup>3</sup>Medical and Population Genetics Program, Broad Institute of MIT and Harvard, Cambridge, Massachusetts 02142, USA. <sup>4</sup>Psychiatric and Neurodevelopmental Genetics Unit, Massachusetts General Hospital, Boston, Massachusetts 02114, USA. <sup>5</sup>Neuropsychiatric Genetics Research Group, Department of Psychiatry, Trinity College Dublin, Dublin 8, Ireland. <sup>6</sup>MRC Centre for Neuropsychiatric Genetics and Genomics, Institute of Psychological Medicine and Clinical Neurosciences, School of Medicine, Cardiff University, Cardiff CF24 4HQ, UK. <sup>7</sup>National Centre for Mental Health, Cardiff University, Cardiff CF24 4HQ, UK. <sup>8</sup>Eli Lilly and Company Limited, Erl Wood Manor, Sunninghill Road, Windlesham, Surrey GU20 6PH, UK. <sup>9</sup>Social, Genetic and Developmental Psychiatry Centre, Institute of Psychiatry, King's College London, London SE5 8AF, UK. <sup>10</sup>Center for Biological Sequence Analysis, Department of Systems Biology, Technical University of Denmark, DK-2800, Denmark. <sup>11</sup>Division of Endocrinology and Center for Basic and Translational Obesity Research, Boston Children's Hospital, Boston, Massachusetts 02115, USA. <sup>12</sup>Department of Clinical Neuroscience, Psychiatry Section, Karolinska Institutet, SE-17176 Stockholm, Sweden. <sup>13</sup>Department of Psychiatry, Diakonhjemmet Hospital, 0319 Oslo, Norway. <sup>14</sup>NORMENT, KG Jebsen Centre for Psychosis Research, Institute of Clinical Medicine, University of Oslo, 0424 Oslo, Norway. <sup>15</sup>Centre for Integrative Register-based Research, CIRRAU, Aarhus University, DK-8210 Aarhus, Denmark. <sup>16</sup>National Centre for Register-based Research, Aarhus University, DK-8210 Aarhus, Denmark. <sup>17</sup>The Lundbeck Foundation Initiative for Integrative Psychiatric Research, iPSYCH, Denmark. <sup>18</sup>State Mental Hospital, 85540 Haar, Germany. <sup>19</sup>Department of Psychiatry and Behavioral Sciences, Stanford University, Stanford, California 94305, USA. <sup>20</sup>Department of Psychiatry and Behavioral Sciences, Atlanta Veterans Affairs Medical Center, Atlanta, Georgia 30033, USA. <sup>21</sup>Department of Psychiatry and Behavioral Sciences, Emory University, Atlanta, Georgia 30322, USA. <sup>22</sup>Virginia Institute for Psychiatric and Behavioral Genetics, Department of Psychiatry, Virginia Commonwealth University, Richmond, Virginia 23298, USA. <sup>23</sup>Clinical Neuroscience, Max Planck Institute of Experimental Medicine, Göttingen 37075, Germany. <sup>24</sup>Department of Medical Genetics, University of Pécs, Pécs H-7624, Hungary. <sup>25</sup>Szentagothai Research Center, University of Pécs, Pécs H-7624, Hungary. <sup>26</sup>Department of Medical Epidemiology and Biostatistics, Karolinska Institutet, Stockholm SE-17177, Sweden. <sup>27</sup>Department of Psychiatry, University of Iowa Carver College of Medicine, Iowa City, Iowa 52242, USA. <sup>28</sup>University Medical Center Groningen, Department of Psychiatry, University of Groningen NL-9700 RB, The Netherlands. <sup>29</sup>School of Nursing, Louisiana State University Health Sciences Center, New Orleans, Louisiana 70112, USA. <sup>30</sup>Athinoula A. Martinos Center, Massachusetts General Hospital, Boston, Massachusetts 02129, USA. <sup>31</sup>Center for Brain Science, Harvard University, Cambridge, Massachusetts 02138, USA. <sup>32</sup>Department of Psychiatry, Massachusetts General Hospital, Boston, Massachusetts 02114, USA. <sup>33</sup>Department of Psychiatry, University of California at San Francisco, San Francisco, California 94143, USA. <sup>34</sup>University Medical Center Utrecht, Department of Psychiatry, Rudolf Magnus Institute of Neuroscience, 3584 Utrecht, The Netherlands. <sup>35</sup>Department of Human Genetics, Icahn School of Medicine at Mount Sinai, New York, New York 10029, USA. <sup>36</sup>Department of Psychiatry, Icahn School of Medicine at Mount Sinai, New York, New York 10029, USA. <sup>37</sup>Centre Hospitalier du Rouvray and INSERM U1079 Faculty of Medicine, 76301 Rouen, France. <sup>38</sup>Department of Human Genetics, David Geffen School of Medicine, University of California, Los Angeles, California 90095,

USA. <sup>39</sup>Schizophrenia Research Institute, Sydney NSW 2010, Australia. <sup>40</sup>School of Psychiatry, University of New South Wales, Sydney NSW 2031, Australia. <sup>41</sup>Royal Brisbane and Women's Hospital, University of Queensland, Brisbane, St Lucia QLD 4072, Australia. <sup>42</sup>Institute of Psychology, Chinese Academy of Science, Beijing 100101, China. <sup>43</sup>Department of Psychiatry, Li Ka Shing Faculty of Medicine, The University of Hong Kong, Hong Kong, China. <sup>44</sup>State Key Laboratory for Brain and Cognitive Sciences, Li Ka Shing Faculty of Medicine, The University of Hong Kong, Hong Kong, China. <sup>45</sup>Department of Computer Science, University of North Carolina, Chapel Hill, North Carolina 27514, USA. <sup>46</sup>Castle Peak Hospital, Hong Kong, China. <sup>47</sup>Institute of Mental Health, Singapore 539747, Singapore. <sup>48</sup>Department of Psychiatry, Washington University, St. Louis, Missouri 63110, USA. <sup>49</sup>Department of Child and Adolescent Psychiatry, Assistance Publique Hopitaux de Paris, Pierre and Marie Curie Faculty of Medicine and Institute for Intelligent Systems and Robotics, Paris 75013, France. <sup>50</sup>Blue Note Biosciences, Princeton, New Jersey 08540, USA. <sup>51</sup>Department of Genetics, University of North Carolina, Chapel Hill, North Carolina 27599-7264, USA. <sup>52</sup>Department of Psychological Medicine, Queen Mary University of London, London E1 1BB, UK. <sup>53</sup>Molecular Psychiatry Laboratory, Division of Psychiatry, University College London, London WC1E 6JJ, UK. <sup>54</sup>Sheba Medical Center, Tel Hashomer 52621, Israel. <sup>55</sup>Department of Genomics, Life and Brain Center, D-53127 Bonn, Germany. <sup>56</sup>Institute of Human Genetics, University of Bonn, D-53127 Bonn, Germany. <sup>57</sup>Applied Molecular Genomics Unit, VIB Department of Molecular Genetics, University of Antwerp, B-2610 Antwerp, Belgium. <sup>58</sup>Centre for Integrative Sequencing, iSEQ, Aarhus University, DK-8000 Aarhus C, Denmark. <sup>59</sup>Department of Biomedicine, Aarhus University, DK-8000 Aarhus C, Denmark. <sup>60</sup>First Department of Psychiatry, University of Athens Medical School, Athens 11528, Greece. <sup>61</sup>Department of Psychiatry, University College Cork, Co. Cork, Ireland. <sup>62</sup>Department of Medical Genetics, Oslo University Hospital, 0424 Oslo, Norway. <sup>63</sup>Cognitive Genetics and Therapy Group, School of Psychology and Discipline of Biochemistry, National University of Ireland Galway, Co. Galway, Ireland. <sup>64</sup>Department of Psychiatry and Behavioral Neuroscience, University of Chicago, Chicago, Illinois 60637, USA. <sup>65</sup>Department of Psychiatry and Behavioral Sciences, NorthShore University HealthSystem, Evanston, Illinois 60201, USA. <sup>66</sup>Department of Non-Communicable Disease Epidemiology, London School of Hygiene and Tropical Medicine, London WC1E 7HT, UK. <sup>67</sup>Department of Child and Adolescent Psychiatry, University Clinic of Psychiatry, Skopje 1000, Republic of Macedonia. <sup>68</sup>Department of Psychiatry, University of Regensburg, 93053 Regensburg, Germany. <sup>69</sup>Department of General Practice, Helsinki University Central Hospital, University of Helsinki P.O. Box 20, Tukholmankatu 8 B, FI-00014, Helsinki, Finland. <sup>70</sup>Folkhälsan Research Center, Helsinki, Finland, Biomedicum Helsinki 1, Haartmaninkatu 8, FI-00290, Helsinki, Finland. <sup>71</sup>National Institute for Health and Welfare, P.O. Box 30, FI-00271 Helsinki, Finland. <sup>72</sup>Translational Technologies and Bioinformatics, Pharma Research and Early Development, F. Hoffman-La Roche, CH-4070 Basel, Switzerland. <sup>73</sup>Department of Psychiatry, Georgetown University School of Medicine, Washington DC 20057, USA. <sup>74</sup>Department of Psychiatry, Keck School of Medicine of the University of Southern California, Los Angeles, California 90033, USA. <sup>75</sup>Department of Psychiatry, Virginia Commonwealth University School of Medicine, Richmond, Virginia 23298, USA. <sup>76</sup>Mental Health Service Line, Washington VA Medical Center, Washington DC 20422, USA. <sup>77</sup>Department of Genetic Epidemiology in Psychiatry, Central Institute of Mental Health, Medical Faculty Mannheim, University of Heidelberg, Heidelberg, D-68159 Mannheim, Germany. <sup>78</sup>Department of Genetics, University of Groningen, University Medical Centre Groningen, 9700 RB Groningen, The Netherlands. <sup>79</sup>Department of Psychiatry, University of Colorado Denver, Aurora, Colorado 80045, USA. <sup>80</sup>Center for Neurobehavioral Genetics, Semel Institute for Neuroscience and Human Behavior, University of California, Los Angeles, California 90095, USA. <sup>81</sup>Department of Psychiatry, University of Halle, 06112 Halle, Germany. <sup>82</sup>Division of Psychiatric Genomics, Department of Psychiatry, Icahn School of Medicine at Mount Sinai, New York, New York, New York 10029, USA. <sup>83</sup>Department of Psychiatry, University of Munich, 80336, Munich, Germany. <sup>84</sup>Departments of Psychiatry and Human and Molecular Genetics, INSERM, Institut de Myologie, Ho<sup>^</sup>pital de la Pitie`-Salpe<sup>^</sup>trie`re, Paris 75013, France. <sup>85</sup>Mental Health Research Centre, Russian

Academy of Medical Sciences, 115522 Moscow, Russia. <sup>86</sup>Neuroscience Therapeutic Area, Janssen Research and Development, Raritan, New Jersey 08869, USA. <sup>87</sup>Queensland Brain Institute, The University of Queensland, Brisbane, Queensland, QLD 4072, Australia. <sup>88</sup>Academic Medical Centre University of Amsterdam, Department of Psychiatry, 1105 AZ Amsterdam, The Netherlands. <sup>89</sup>llumina, La Jolla, California, California 92122, USA. <sup>90</sup>Institute of Biological Psychiatry, Mental Health Centre Sct. Hans, Mental Health Services Copenhagen, DK-4000, Denmark. <sup>91</sup>Friedman Brain Institute, Icahn School of Medicine at Mount Sinai, New York, New York 10029, USA. <sup>92</sup>J. J. Peters VA Medical Center, Bronx, New York, New York 10468, USA. <sup>93</sup>Priority Research Centre for Health Behaviour, University of Newcastle, Newcastle NSW 2308, Australia. <sup>94</sup>School of Electrical Engineering and Computer Science, University of Newcastle, Newcastle NSW 2308, Australia. <sup>95</sup>Division of Medical Genetics, Department of Biomedicine, University of Basel, Basel CH-4058, Switzerland. <sup>96</sup>Department of Genetics, Harvard Medical School, Boston, Massachusetts, Massachusetts 02115, USA. <sup>97</sup>Section of Neonatal Screening and Hormones, Department of Clinical Biochemistry, Immunology and Genetics, Statens Serum Institut, Copenhagen DK-2300, Denmark. <sup>98</sup>Department of Psychiatry, Fujita Health University School of Medicine, Toyoake, Aichi, 470-1192, Japan. <sup>99</sup>Regional Centre for Clinical Research in Psychosis, Department of Psychiatry, Stavanger University Hospital, 4011 Stavanger, Norway. <sup>100</sup>Rheumatology Research Group, Vall d'Hebron Research Institute, Barcelona 08035, Spain. <sup>101</sup>Centre for Medical Research, The University of Western Australia, Perth WA6009, Australia. <sup>102</sup>The Perkins Institute for Medical Research, The University of Western Australia, Perth WA6009, Australia. <sup>103</sup>Department of Medical Genetics, Medical University, Sofia 1431, Bulgaria. <sup>104</sup>Department of Psychology, University of Colorado Boulder, Boulder, Colorado 80309, USA. <sup>105</sup>Campbell Family Mental Health Research Institute, Centre for Addiction and Mental Health, Toronto, Ontario M5T 1R8, Canada. <sup>106</sup>Department of Psychiatry, University of Toronto, Toronto, Ontario M5T 1R8, Canada. <sup>107</sup>Institute of Medical Science, University of Toronto, Toronto, Ontario M5S 1A8, Canada. <sup>108</sup>Institute of Molecular Genetics, Russian Academy of Sciences, Moscow 123182, Russia. <sup>109</sup>Latvian Biomedical Research and Study Centre, Riga, LV-1067, Latvia. <sup>110</sup>Department of Psychiatry and Zilkha Neurogenetics Institute, Keck School of Medicine at University of Southern California, Los Angeles, California 90089, USA. <sup>111</sup>Faculty of Medicine, Vilnius University, LT-01513 Vilnius, Lithuania. <sup>112</sup>Department of Biology and Medical Genetics, 2nd Faculty of Medicine and University Hospital Motol, 150 06 Prague, Czech Republic. <sup>113</sup>Department of Child and Adolescent Psychiatry, Pierre and Marie Curie Faculty of Medicine, Paris 75013, France. <sup>114</sup>Duke-NUS Graduate Medical School, Singapore 169857. <sup>115</sup>Department of Psychiatry, Hadassah-Hebrew University Medical Center, Jerusalem 91120, Israel. <sup>116</sup>Centre for Genomic Sciences, The University of Hong Kong, Hong Kong, China. <sup>117</sup>Mental Health Centre and Psychiatric Laboratory, West China Hospital, Sichuan University, Chengdu, 610041 Sichuan, China. <sup>118</sup>Department of Biostatistics, Johns Hopkins University Bloomberg School of Public Health, Baltimore, Maryland 21205, USA. <sup>119</sup>Department of Psychiatry, Columbia University, New York, New York 10032, USA. <sup>120</sup>Priority Centre for Translational Neuroscience and Mental Health, University of Newcastle, Newcastle NSW 2300, Australia. <sup>121</sup>Department of Genetics and Pathology, International Hereditary Cancer Center, Pomeranian Medical University in Szczecin, 70-453 Szczecin, Poland. <sup>122</sup>Department of Mental Health and Substance Abuse Services; National Institute for Health and Welfare, P.O. BOX 30, FI-00271 Helsinki, Finland. <sup>123</sup>Department of Mental Health, Bloomberg School of Public Health, Johns Hopkins University, Baltimore, Maryland 21205, USA. <sup>124</sup>Department of Psychiatry, University of Bonn, D-53127 Bonn, Germany. <sup>125</sup>Centre National de la Recherche Scientifique, Laboratoire de Génétique Moléculaire de la Neurotransmission et des Processus Neurodéveloppementaux, Hôpital de la Pitié Salpêtrière, 75013 Paris, France. <sup>126</sup>Department of Genomics Mathematics, University of Bonn, D-53127 Bonn, Germany. <sup>127</sup>Research Unit, Sørlandet Hospital, 4604 Kristiansand, Norway. <sup>128</sup>Department of Psychiatry, Harvard Medical School, Boston, Massachusetts 02115, USA. <sup>129</sup>VA Boston Health Care System, Brockton, Massachusetts 02301, USA. <sup>130</sup>Department of Psychiatry, National University of Ireland Galway, Co. Galway,

Ireland. <sup>131</sup>Centre for Cognitive Ageing and Cognitive Epidemiology, University of Edinburgh, Edinburgh EH16 4SB, UK. <sup>132</sup>Division of Psychiatry, University of Edinburgh, Edinburgh, EH16 4SB, UK. <sup>133</sup>Division of Mental Health and Addiction, Oslo University Hospital, 0424 Oslo, Norway. <sup>134</sup>Massachusetts Mental Health Center Public Psychiatry Division of the Beth Israel Deaconess Medical Center, Boston, Massachusetts 02114, USA. <sup>135</sup>Estonian Genome Center, University of Tartu, Tartu 50090, Estonia. <sup>136</sup>School of Psychology, University of Newcastle, Newcastle NSW 2308, Australia. <sup>137</sup>First Psychiatric Clinic, Medical University, Sofia 1431, Bulgaria. <sup>138</sup>Department P, Aarhus University Hospital, DK-8240 Risskov, Denmark. <sup>139</sup>Department of Psychiatry, Royal College of Surgeons in Ireland, Dublin 2, Ireland. <sup>140</sup>King's College London, London SE5 8AF, UK. <sup>141</sup>Maastricht University Medical Centre, South Limburg Mental Health Research and Teaching Network, EURON, 6229 HX Maastricht, The Netherlands. <sup>142</sup>Institute of Translational Medicine, University of Liverpool, Liverpool L69 3BX, UK. <sup>143</sup>Max Planck Institute of Psychiatry, 80336 Munich, Germany. <sup>144</sup>Munich Cluster for Systems Neurology (SyNergy), 80336 Munich, Germany. <sup>145</sup>Department of Psychiatry and Psychotherapy, Jena University Hospital, 07743 Jena, Germany. <sup>146</sup>Department of Psychiatry, Queensland Brain Institute and Queensland Centre for Mental Health Research, University of Queensland, Brisbane, Queensland, St Lucia QLD 4072, Australia. <sup>147</sup>Department of Psychiatry and Behavioral Sciences, Johns Hopkins University School of Medicine, Baltimore, Maryland 21205, USA. <sup>148</sup>Department of Psychiatry, Trinity College Dublin, Dublin 2, Ireland. <sup>149</sup>Eli Lilly and Company, Lilly Corporate Center, Indianapolis, 46285 Indiana, USA. <sup>150</sup>Department of Clinical Sciences, Psychiatry, Umeå University, SE-901 87 Umeå, Sweden. <sup>151</sup>DETECT Early Intervention Service for Psychosis, Blackrock, Co. Dublin, Ireland. <sup>152</sup>Centre for Public Health, Institute of Clinical Sciences, Queen's University Belfast, Belfast BT12 6AB, UK. <sup>153</sup>Lawrence Berkeley National Laboratory, University of California at Berkeley, Berkeley, California 94720, USA. <sup>154</sup>Institute of Psychiatry, King's College London, London SE5 8AF, UK. <sup>155</sup>A list of authors and affiliations appear in the Supplementary Information. <sup>156</sup>Melbourne Neuropsychiatry Centre, University of Melbourne & Melbourne Health, Melbourne, Vic 3053, Australia. <sup>157</sup>Department of Psychiatry, University of Helsinki, P.O. Box 590, FI-00029 HUS, Helsinki, Finland. <sup>158</sup>Public Health Genomics Unit, National Institute for Health and Welfare, P.O. BOX 30, FI-00271 Helsinki, Finland. <sup>159</sup>Medical Faculty, University of Belgrade, 11000 Belgrade, Serbia. <sup>160</sup>Department of Psychiatry, University of North Carolina, Chapel Hill, North Carolina 27599-7160, USA. <sup>161</sup>Institute for Molecular Medicine Finland, FIMM, University of Helsinki, P.O. Box 20FI-00014, Helsinki, Finland. <sup>162</sup>Department of Epidemiology, Harvard School of Public Health, Boston, Massachusetts 02115, USA. <sup>163</sup>Department of Psychiatry, University of Oxford, Oxford, OX3 7JX, UK. <sup>164</sup>Virginia Institute for Psychiatric and Behavioral Genetics, Virginia Commonwealth University, Richmond, Virginia 23298, USA. <sup>165</sup>Institute for Multiscale Biology, Icahn School of Medicine at Mount Sinai, New York, New York 10029, USA. <sup>166</sup>PharmaTherapeutics Clinical Research, Pfizer Worldwide Research and Development, Cambridge, Massachusetts 02139, USA. <sup>167</sup>Department of Psychiatry and Psychotherapy, University of Gottingen, 37073 Gottingen, Germany. <sup>168</sup>Psychiatry and Psychotherapy Clinic, University of Erlangen, 91054 Erlangen, Germany. <sup>169</sup>Hunter New England Health Service, Newcastle NSW 2308, Australia. <sup>170</sup>School of Biomedical Sciences, University of Newcastle, Newcastle NSW 2308, Australia. <sup>171</sup>Division of Cancer Epidemiology and Genetics, National Cancer Institute, Bethesda, Maryland 20892, USA. <sup>172</sup>University of Iceland, Landspítali, National University Hospital, 101 Reykjavik, Iceland. <sup>173</sup>Department of Psychiatry and Drug Addiction, Tbilisi State Medical University (TSMU), N33, 0177 Tbilisi, Georgia. <sup>174</sup>Research and Development, Bronx Veterans Affairs Medical Center, New York, New York 10468, USA. <sup>175</sup>Wellcome Trust Centre for Human Genetics, Oxford OX3 7BN, UK. <sup>176</sup>deCODE Genetics, 101 Reykjavik, Iceland. <sup>177</sup>Department of Clinical Neurology, Medical University of Vienna, 1090 Wien, Austria. <sup>178</sup>Lieber Institute for Brain Development, Baltimore, Maryland 21205, USA. <sup>179</sup>Department of Medical Genetics, University Medical Centre Utrecht, Universiteitsweg 100, 3584 CG, Utrecht, The Netherlands. <sup>180</sup>Berkshire Healthcare NHS Foundation Trust, Bracknell RG12 1BQ, UK. <sup>181</sup>Section of Psychiatry, University of Verona, 37134 Verona, Italy. <sup>182</sup>Department of Psychiatry, University of Oulu, P.O. Box 5000, 90014,

Finland. <sup>183</sup>University Hospital of Oulu, P.O. Box 20, 90029 OYS, Finland. <sup>184</sup>Molecular and Cellular Therapeutics, Royal College of Surgeons in Ireland, Dublin 2, Ireland. <sup>185</sup>Health Research Board, Dublin 2, Ireland. <sup>186</sup>School of Psychiatry and Clinical Neurosciences, The University of Western Australia, Perth WA6009, Australia. <sup>187</sup>Computational Sciences CoE, Pfizer Worldwide Research and Development, Cambridge, Massachusetts, 02139, USA. <sup>188</sup>Human Genetics, Genome Institute of Singapore, A\*STAR, Singapore 138672. <sup>190</sup>University College London, London WC1E 6BT, UK. <sup>191</sup>Department of Neuroscience, Icahn School of Medicine at Mount Sinai, New York, New York 10029, USA. <sup>192</sup>Institute of Neuroscience and Medicine (INM-1), Research Center Juelich, 52428 Juelich, Germany. <sup>193</sup>Department of Genetics, The Hebrew University of Jerusalem, 91905 Jerusalem, Israel. <sup>194</sup>Neuroscience Discovery and Translational Area, Pharma Research and Early Development, F. Hoffman-La Roche, CH-4070 Basel, Switzerland. <sup>195</sup>Centre for Clinical Research in Neuropsychiatry, School of Psychiatry and Clinical Neurosciences, The University of Western Australia, Medical Research Foundation Building, Perth WA6000, Australia. <sup>196</sup>Virginia Institute for Psychiatric and Behavioral Genetics, Departments of Psychiatry and Human and Molecular Genetics, Virginia Commonwealth University, Richmond, Virginia 23298, USA. <sup>197</sup>The Feinstein Institute for Medical Research, Manhasset, New York 11030, USA. <sup>198</sup>The Hofstra NS-LIJ School of Medicine, Hempstead, New York 11549, USA. <sup>199</sup>The Zucker Hillside Hospital, Glen Oaks, New York 11004, USA. <sup>200</sup>Saw Swee Hock School of Public Health, National University of Singapore, Singapore 117597, Singapore. <sup>201</sup>Queensland Centre for Mental Health Research, University of Queensland, Brisbane 4076, Queensland, Australia. <sup>202</sup>Center for Human Genetic Research and Department of Psychiatry, Massachusetts General Hospital, Boston, Massachusetts 02114, USA. <sup>203</sup>Department of Child and Adolescent Psychiatry, Erasmus University Medical Centre, Rotterdam 3000, The Netherlands. <sup>204</sup>Department of Complex Trait Genetics, Neuroscience Campus Amsterdam, VU University Medical Center Amsterdam, Amsterdam 1081, The Netherlands. <sup>205</sup>Department of Functional Genomics, Center for Neurogenomics and Cognitive Research, Neuroscience Campus Amsterdam, VU University, Amsterdam 1081, The Netherlands. <sup>206</sup>University of Aberdeen, Institute of Medical Sciences, Aberdeen AB25 2ZD, UK. <sup>207</sup>Departments of Psychiatry, Neurology, Neuroscience and Institute of Genetic Medicine, Johns Hopkins School of Medicine, Baltimore, Maryland 21205, USA. <sup>208</sup>Department of Clinical Medicine, University of Copenhagen, Copenhagen 2200, Denmark.
